# Supplementary material
Source: PubMed Central journal article supplement (PMC6335999)

## Supporting Information

### Synthesis of D-(+)-camphor based N-acylhydrazones and their antiviral activity

Kseniya S. Kovaleva<sup>\*abc</sup>, Fedor I. Zubkov<sup>\*c</sup>, Nikolay I. Bormotov<sup>d</sup>, Roman A. Novikov<sup>e</sup>, Pavel V. Dorovatovskii<sup>f</sup>, Victor N. Khrustalev<sup>cf</sup>, Yuriy V. Gatilov<sup>ab</sup>, Vladimir V. Zarubaev<sup>g</sup>, Olga I. Yarovaya<sup>\*ab</sup>, Larisa N. Shishkina<sup>d</sup>, Nariman F. Salakhutdinov<sup>ab</sup>

- a) *Novosibirsk Institute of Organic Chemistry, Siberian Branch of the Russian Academy of Sciences, Lavrentjev Ave. 9, 630090 Novosibirsk, Russian Federation. e-mail: [ooo@nioch.nsc.ru](mailto:ooo@nioch.nsc.ru)*
- b) *Novosibirsk State University, Pirogova St. 2, 630090 Novosibirsk, Russian Federation. e-mail: [kseniya.kovaleva3103@yandex.ru](mailto:kseniya.kovaleva3103@yandex.ru)*
- c) *RUDN University, 6 Miklukho-Maklaya St., 117198 Moscow, Russian Federation; e-mail: [fzubkov@sci.pfu.edu.ru](mailto:fzubkov@sci.pfu.edu.ru)*
- d) *Department of prevention and treatment of especially dangerous infections, State Research Centre of Virology and Biotechnology VECTOR, Koltsovo, Novosibirsk Region, 630559, Russian Federation.*
- e) *Engelhardt Institute of Molecular Biology, Russian Academy of Sciences, 32 Vavilov St., 119991 Moscow, Russian Federation.*
- f) *National Research Center "Kurchatov Institute", 1 Acad. Kurchatov Sq., 123182 Moscow, Russian Federation.*
- g) *Pasteur Institute of Epidemiology and Microbiology, 14 Mira str., 197101 St. Petersburg, Russia*

## 1. Experimental Section

### 1.1. Chemistry

Commercially available reagent grade chemicals used as received. <sup>1</sup>H and <sup>13</sup>C NMR spectra were acquired on a Bruker DRX-500 spectrometer (500 and 125 MHz, respectively) in CDCl<sub>3</sub>, with residual solvent signals used as internal standards (7.24 ppm for <sup>1</sup>H nuclei, 76.9 ppm for <sup>13</sup>C nuclei). High-resolution mass spectra were recorded on a Thermo Scientific DFS instrument in full scan mode over the *m/z* range of 0–500, ionization by electron impact at 70 eV, and direct introduction of samples. The reaction products were separated by column chromatography (60-200 μm silica gel, Masherey-Nagel). GC-MS analysis was performed on an Agilent 7890 A gas chromatograph with an Agilent 5975C quadrupole mass spectrometer as detector, HP-5MS 30000×0.25 mm fused silica column, carrier gas – helium. The identification of compounds was performed by comparing the retention times with a series of authentic samples and comparing the complete experimentally obtained mass spectra with mass spectral database. The structures of the obtained compounds were established from <sup>1</sup>H and <sup>13</sup>C NMR spectra, two-dimensional homonuclear <sup>1</sup>H–<sup>1</sup>H COSY and NOESY experiments, as well as two-dimensional heteronuclear <sup>1</sup>H–<sup>13</sup>C HSQC and HMBC experiments. The atom numbering in the compounds is intended for the assignment of NMR signals and does not match the IUPAC nomenclature.

### 1.2. X-ray diffraction studies.

The single-crystal X-ray diffraction data for **13** and **16** were collected at the 'Belok' beamline of the Kurchatov Synchrotron Radiation Source (National Research Center 'Kurchatov Institute', Moscow, Russian Federation) using a Rayonix SX165 CCD detector at λ = 0.80246 Å. A total of 720 images for two different

orientations in the case of each crystal were collected using an oscillation range of  $1.0^\circ$  and  $\varphi$  scanning mode. The data were indexed and integrated using the utility iMOSFLM from the CCP4 program suite [1] and then scaled and corrected for absorption using the Scala program [2]. For details, see Table S1. The structures were determined by direct methods and refined by full-matrix least square technique on  $F^2$  in anisotropic approximation for non-hydrogen atoms. The independent parts of the unit cells of **13** and **16** contained two ethyl acetate solvate molecules. The hydrogen atoms of the amino groups were objectively localized in the difference-Fourier maps and refined isotropically with fixed displacement parameters [ $U_{\text{iso}}(\text{H}) = 1.2U_{\text{eq}}(\text{N})$ ]. The other hydrogen atoms in **13** and **16** were placed in calculated positions and refined within the riding model with fixed isotropic displacement parameters [ $U_{\text{iso}}(\text{H}) = 1.5U_{\text{eq}}(\text{C})$  for the methyl groups and  $1.2U_{\text{eq}}(\text{C})$  for the other groups]. All calculations were carried out using the SHELXTL program suite [3].

The X-ray diffraction data of **11** (Figure S1) were collected with a Bruker KAPPA APEX II CCD diffractometer with graphite monochromated Mo- $K\alpha$  radiation ( $0.71073 \text{ \AA}$ ) at the Collective Chemical Service Center of SB RAS. Absorption corrections were applied with SADABS [4]. The structure was solved by the direct method. The positions and temperature factors for the non-hydrogen atoms were refined anisotropically by the full-matrix least-squares technique. The hydrogen atoms of the amine groups were localized in a difference Fourier map and refined isotropically; the other hydrogen atoms were refined in a riding model. All computations were done with the SHELX-97 program suite [3].

Crystallographic data for **11**, **13**• $\frac{1}{2}$ CH<sub>3</sub>COOC<sub>2</sub>H<sub>5</sub> and **16**• $\frac{1}{2}$ CH<sub>3</sub>COOC<sub>2</sub>H<sub>5</sub> have been deposited with the Cambridge Crystallographic Data Center, CCDC 1873457 (**11**), CCDC 1860266 (**13**) and CCDC 1860267 (**16**).

- [1] Batty, T. G. G.; Kontogiannis, L.; Johnson, O.; Powell, H. R.; Leslie, A. G. W. *Acta Cryst.* **2011**, *D67*, 271-281.
- [2] Evans, P. R. *Acta Cryst.* **2006**, *D62*, 72-82.
- [3] Sheldrick, G. M. *Acta Cryst.* **2015**, *C71*, 3-8.
- [4] G. M. Sheldrick, *SADABS, Program for Area Detector Adsorption Correction*, University of Gottingen, Germany, **1996**.

**Table S1.** Crystal data and structure refinements for compounds **11**, **13** and **16**.

| Compound                                                     | <b>11</b>                                                         | <b>13</b> •½CH <sub>3</sub> CO <sub>2</sub> C <sub>2</sub> H <sub>5</sub> | <b>16</b> •½CH <sub>3</sub> CO <sub>2</sub> C <sub>2</sub> H <sub>5</sub> |
|--------------------------------------------------------------|-------------------------------------------------------------------|---------------------------------------------------------------------------|---------------------------------------------------------------------------|
| Empirical formula                                            | C <sub>15</sub> H <sub>20</sub> N <sub>2</sub> O <sub>2</sub>     | C <sub>48</sub> H <sub>70</sub> N <sub>6</sub> O <sub>10</sub>            | C <sub>58</sub> H <sub>74</sub> N <sub>6</sub> O <sub>8</sub>             |
| Formula weight                                               | 260.33                                                            | 891.10                                                                    | 983.23                                                                    |
| Temperature, K                                               | 296(2)                                                            | 100.0(2)                                                                  | 100.0(2)                                                                  |
| Crystal system                                               | Monoclinic                                                        | Monoclinic                                                                | Monoclinic                                                                |
| Space group                                                  | <i>P2</i> <sub>1</sub>                                            | <i>P2</i> <sub>1</sub>                                                    | <i>P2</i> <sub>1</sub>                                                    |
| <i>a</i> , Å                                                 | 10.6401(9)                                                        | 10.819(2)                                                                 | 10.949(2)                                                                 |
| <i>b</i> , Å                                                 | 13.1077(13)                                                       | 14.713(3)                                                                 | 15.752(3)                                                                 |
| <i>c</i> , Å                                                 | 11.0890(11)                                                       | 30.167(6)                                                                 | 31.273(6)                                                                 |
| $\alpha$ , deg.                                              | 90                                                                | 90                                                                        | 90                                                                        |
| $\beta$ , deg.                                               | 111.310(4)                                                        | 96.24(3)                                                                  | 98.92(3)                                                                  |
| $\gamma$ , deg.                                              | 90                                                                | 90                                                                        | 90                                                                        |
| <i>V</i> , Å <sup>3</sup>                                    | 1440.8(2)                                                         | 4773.5(16)                                                                | 5328.4(18)                                                                |
| <i>Z</i>                                                     | 4                                                                 | 4                                                                         | 4                                                                         |
| <i>D</i> <sub>calc</sub> , g·cm <sup>-3</sup>                | 1.200                                                             | 1.240                                                                     | 1.226                                                                     |
| Absorption coefficient, $\mu$                                | 0.080                                                             | 0.113                                                                     | 0.106                                                                     |
| <i>F</i> (000)                                               | 560                                                               | 1920                                                                      | 2112                                                                      |
| Crystal size, mm                                             | 0.025×0.21×0.28                                                   | 0.20×0.25×0.30                                                            | 0.15×0.40×0.40                                                            |
| Theta range for data collection                              | 1.97 - 25.73                                                      | 3.22 – 30.97                                                              | 1.64 – 31.02                                                              |
| Index ranges                                                 | -12 < <i>h</i> < 12<br>-15 < <i>k</i> < 15<br>-13 < <i>l</i> < 13 | -13 < <i>h</i> < 13<br>-18 < <i>k</i> < 18<br>-38 < <i>l</i> < 38         | -13 < <i>h</i> < 13<br>-20 < <i>k</i> < 20<br>-40 < <i>l</i> < 40         |
| Reflections collected                                        | 27666                                                             | 51592                                                                     | 59231                                                                     |
| Independent reflections, <i>R</i> <sub>int</sub>             | 5454, 0.064                                                       | 20491, 0.064                                                              | 21802, 0.081                                                              |
| Reflections observed with <i>I</i> > 2 $\sigma$ ( <i>I</i> ) | 3608                                                              | 18394                                                                     | 16961                                                                     |
| Absorption correction                                        | semi-empirical                                                    | semi-empirical                                                            | semi-empirical                                                            |
| Data / restraints/ parameters                                | 5454 / 1 / 349                                                    | 20491 / 1 / 1186                                                          | 21802 / 1/ 1314                                                           |
| Goodness-of-fit on <i>F</i> <sup>2</sup>                     | 1.008                                                             | 1.042                                                                     | 1.012                                                                     |
| <i>R</i> <sub>1</sub> [ <i>I</i> > 2 $\sigma$ ( <i>I</i> )]  | 0.047                                                             | 0.061                                                                     | 0.075                                                                     |
| <i>wR</i> <sub>2</sub> [all data]                            | 0.122                                                             | 0.157                                                                     | 0.178                                                                     |
| Extinction coefficient                                       | -                                                                 | 0.0219(13)                                                                | 0.0078(5)                                                                 |
| <i>T</i> <sub>min</sub> / <i>T</i> <sub>max</sub>            | 0.943 / 0.988                                                     | 0.960 / 0.970                                                             | 0.950 / 0.980                                                             |

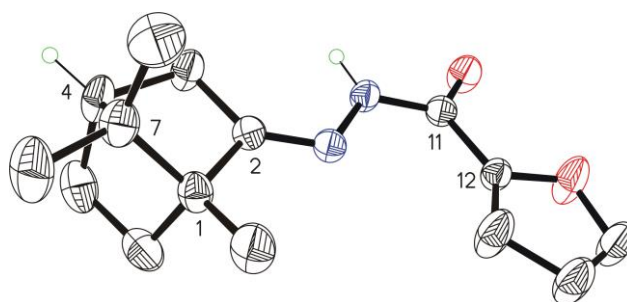**Figure S1.** Molecular structure of **11**. Displacement ellipsoids are depicted at the 30% probability level. Only hydrogen atoms at the asymmetric center and at the amine group are presented.

## 2. Copies of the NMR Spectra for compounds 6-19.

### 2.1. N'-[(1R,2E,4R)-1,7,7-trimethylbicyclo[2.2.1]hept-2-ylidene]acetohydrazide 6 (CDCl<sub>3</sub>, 400.0 MHz)

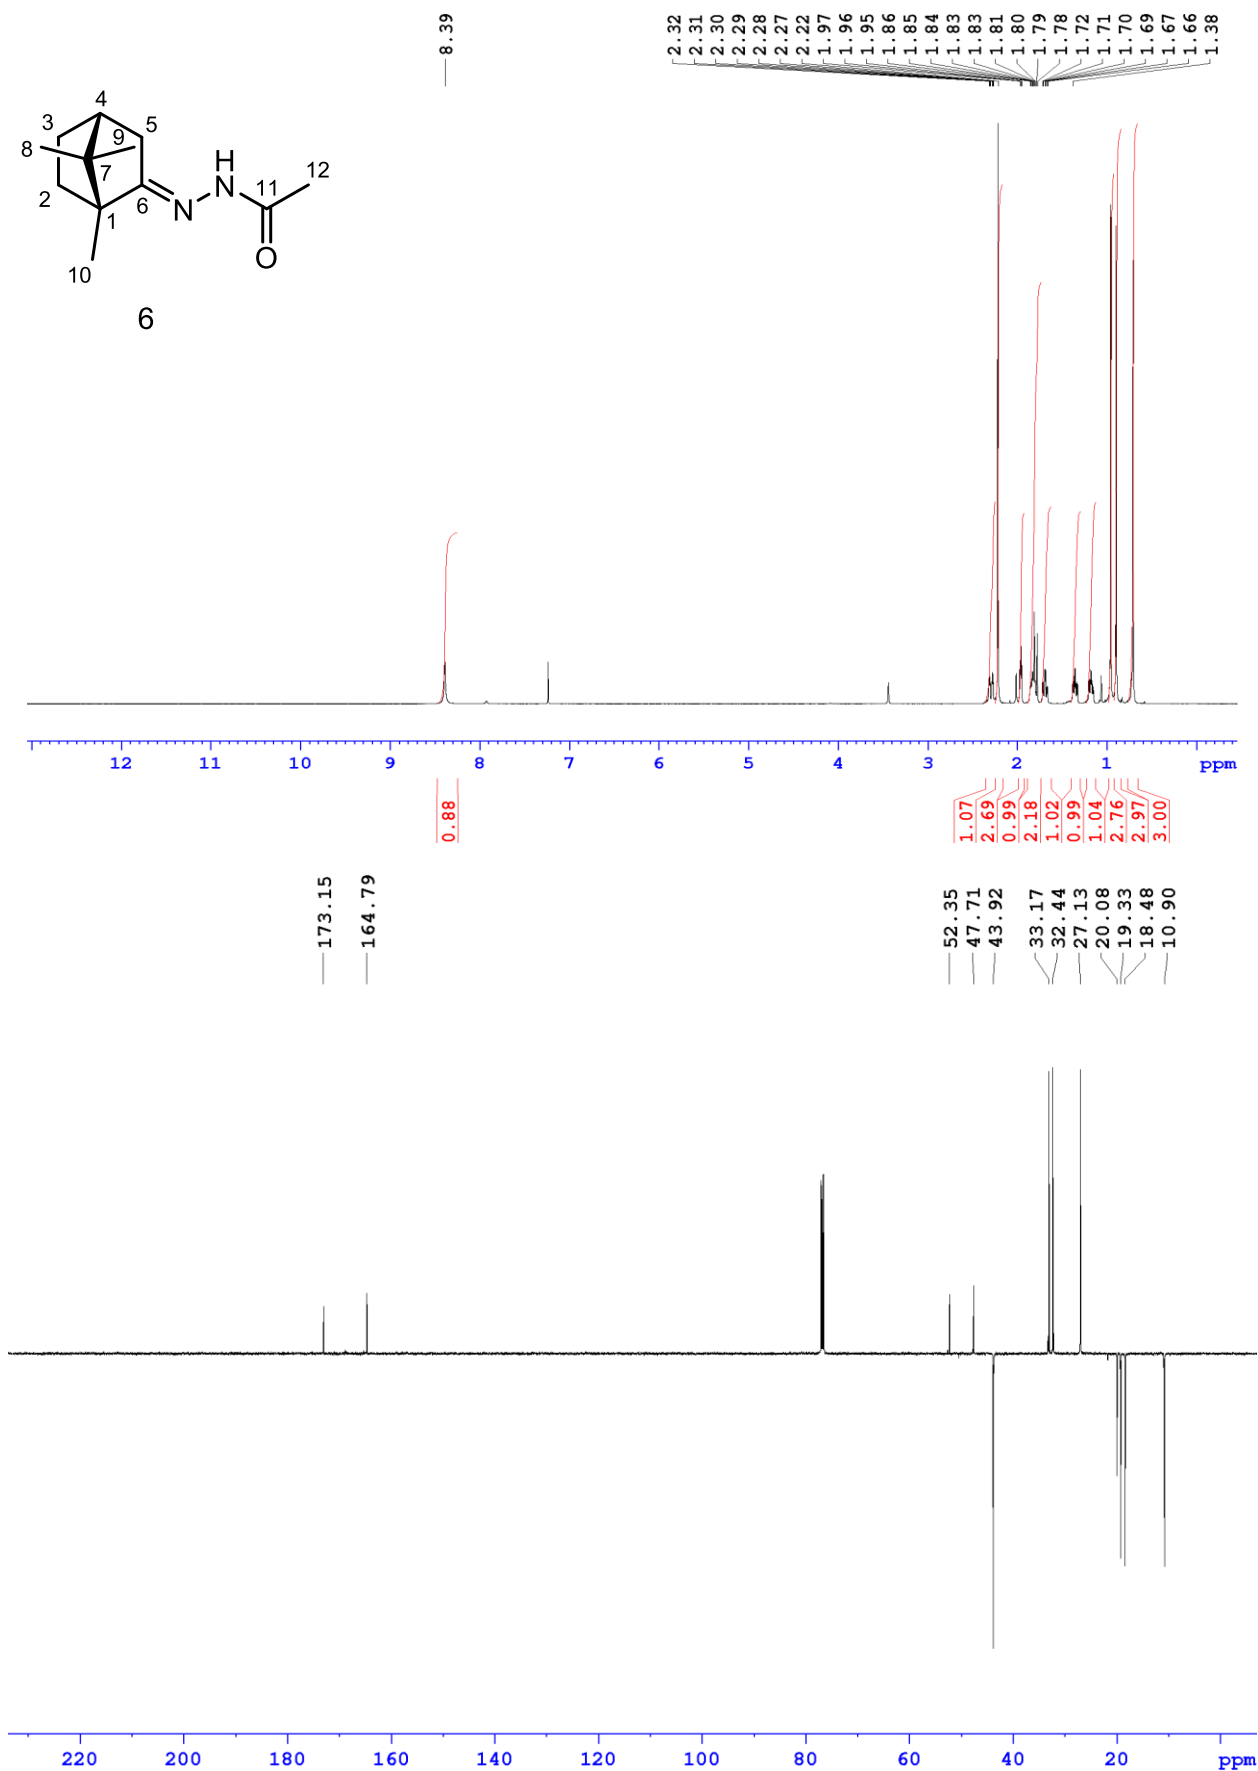

2.2. 2,2,2-trifluoro-N'-[(1R,2E,4R)-1,7,7-trimethylbicyclo[2.2.1]hept-2-ylidene]acetohydrazide 7 (CDCl<sub>3</sub>+DMSO-d<sub>6</sub>, 400.0 MHz)

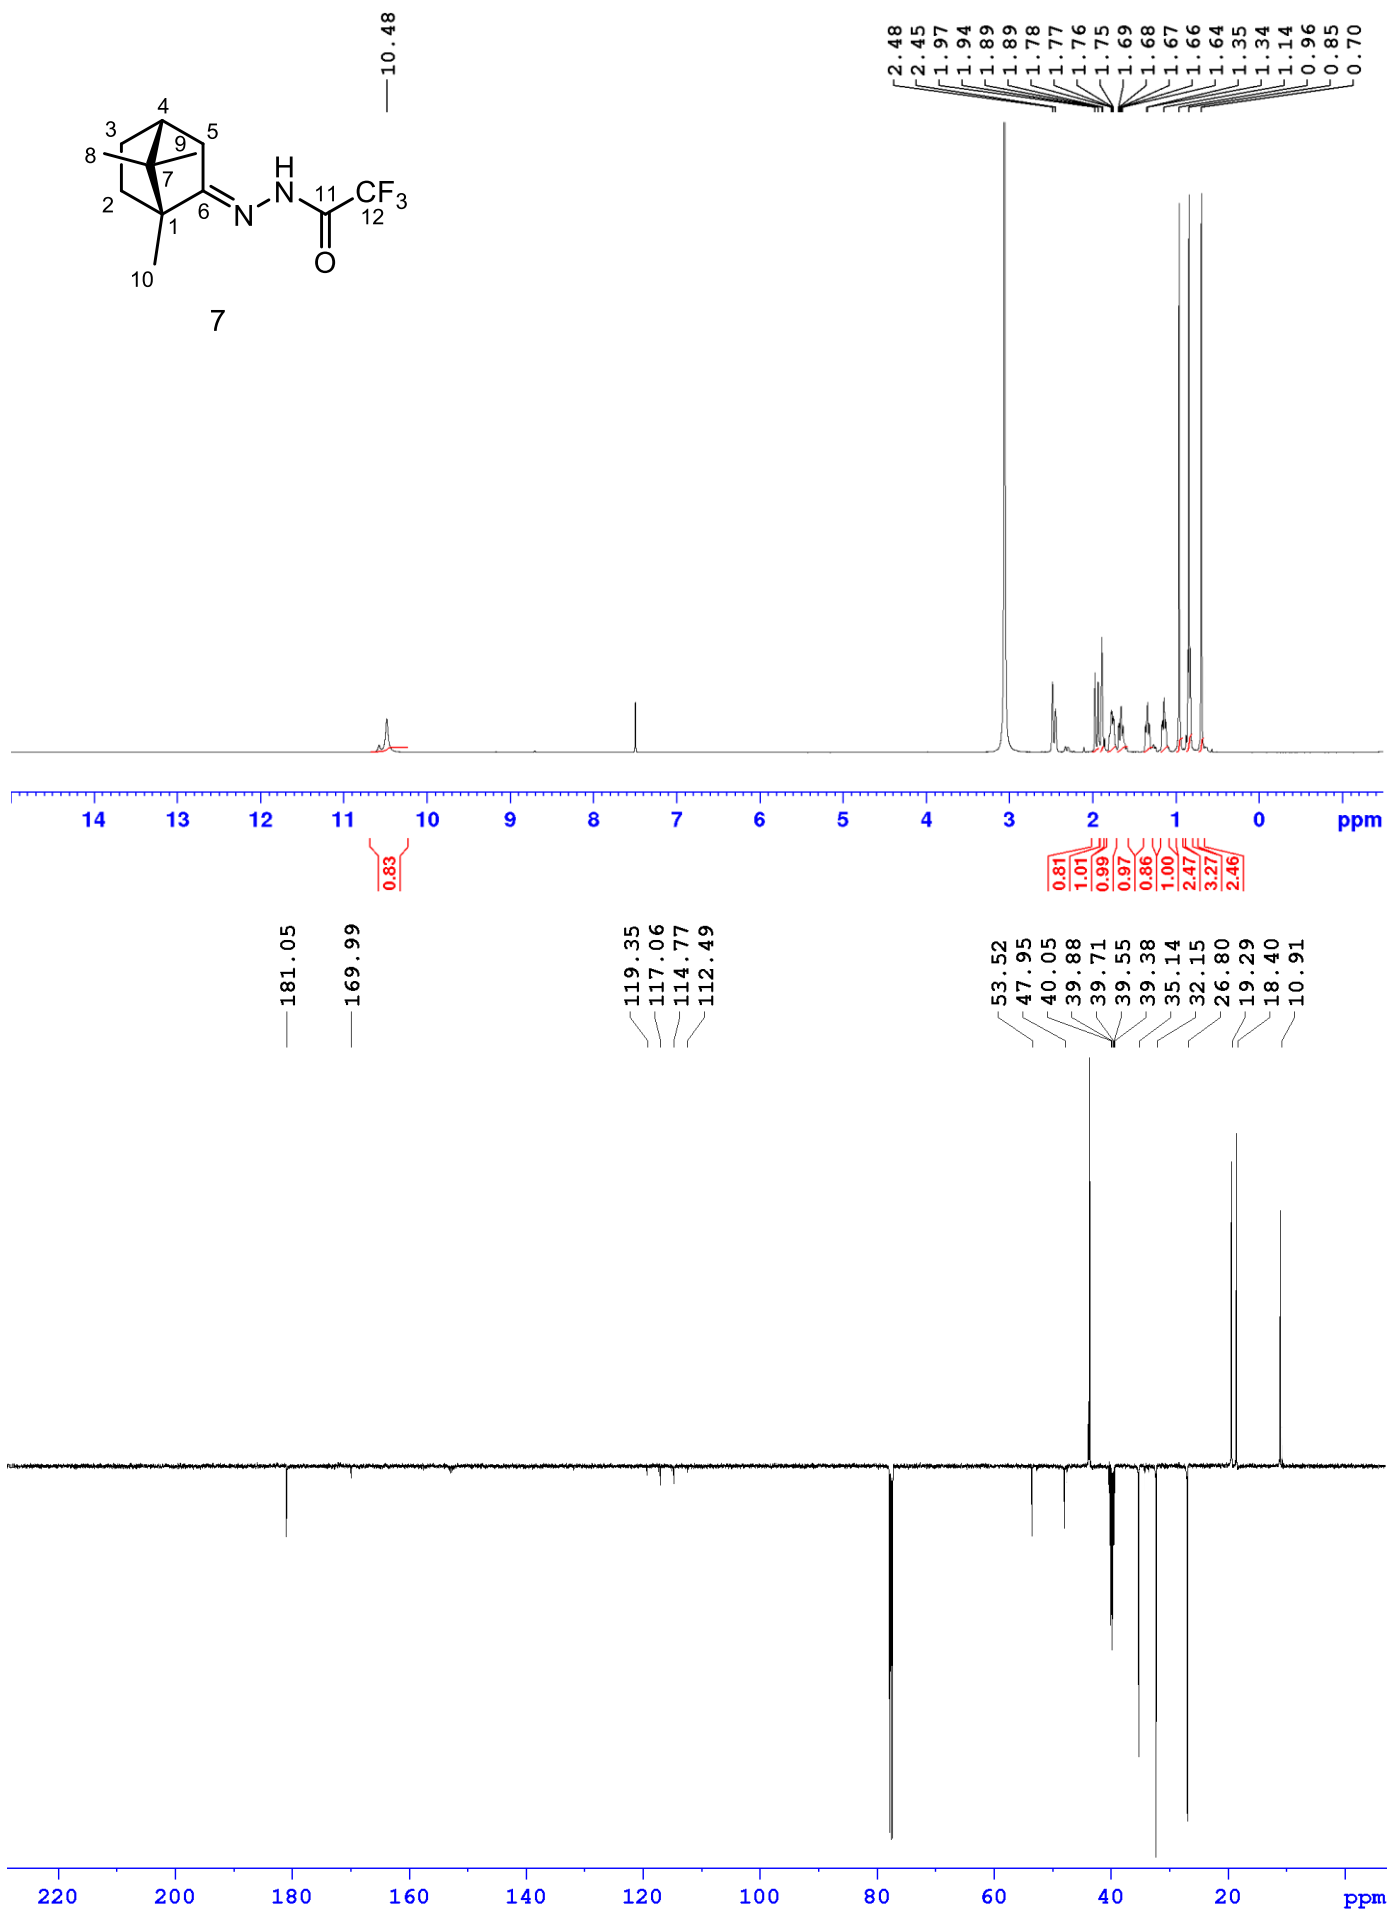

2.3. N'-[(1R,2E,4R)-1,7,7-trimethylbicyclo[2.2.1]hept-2-ylidene]butanohydrazide **8** (CDCl<sub>3</sub>, 400.0 MHz)

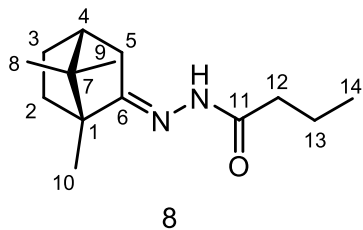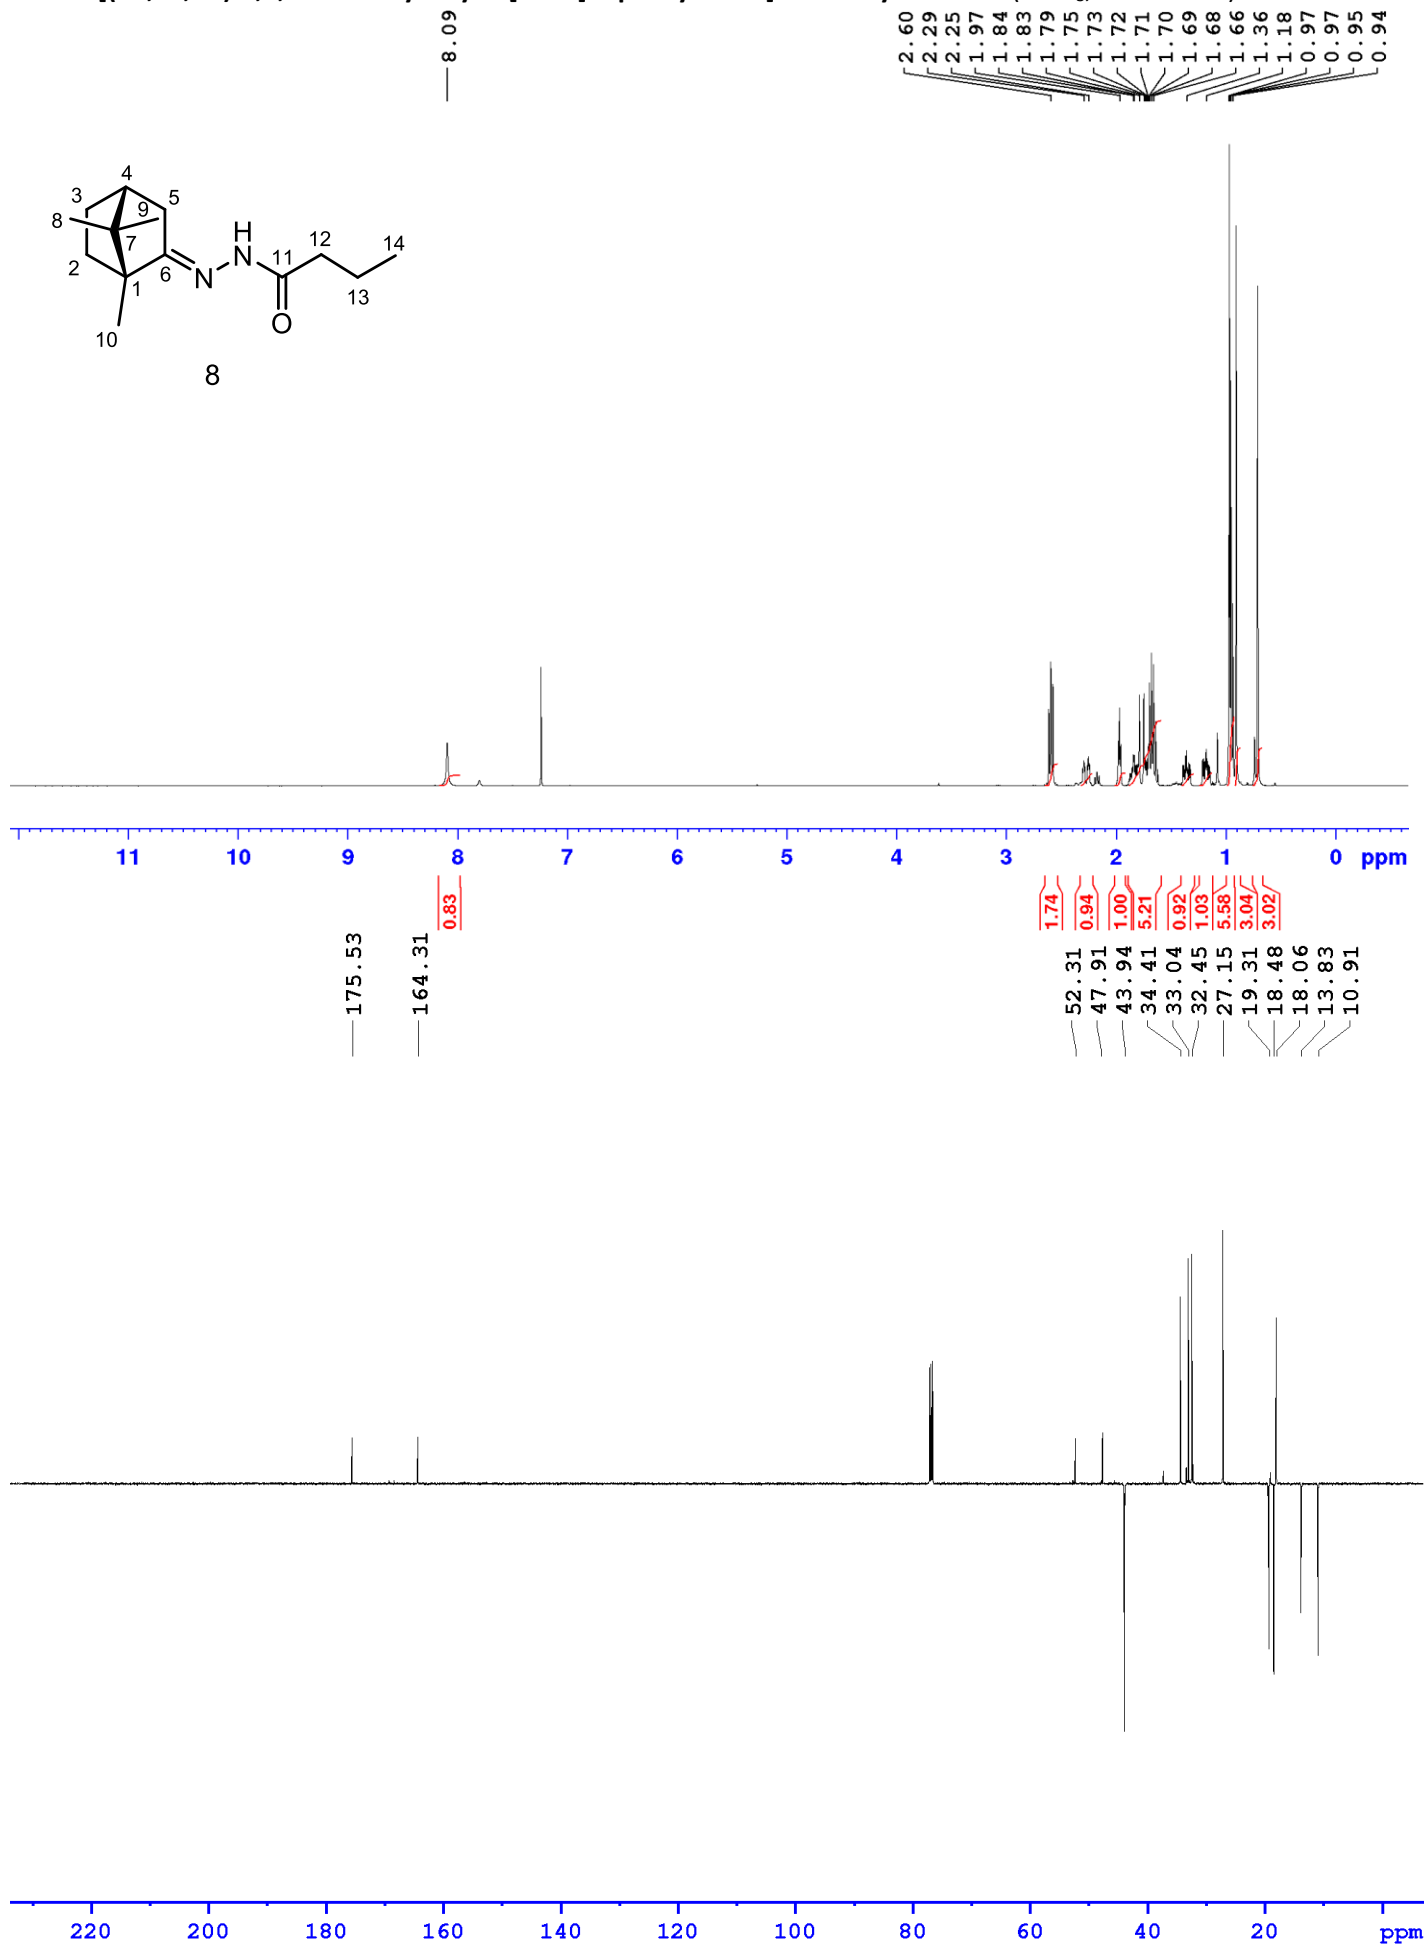

2.4. N'-[(1R,2E,4R)-1,7,7-trimethylbicyclo[2.2.1]hept-2-ylidene]benzohydrazide 9 (DMSO-d<sub>6</sub>, 400.0 MHz)

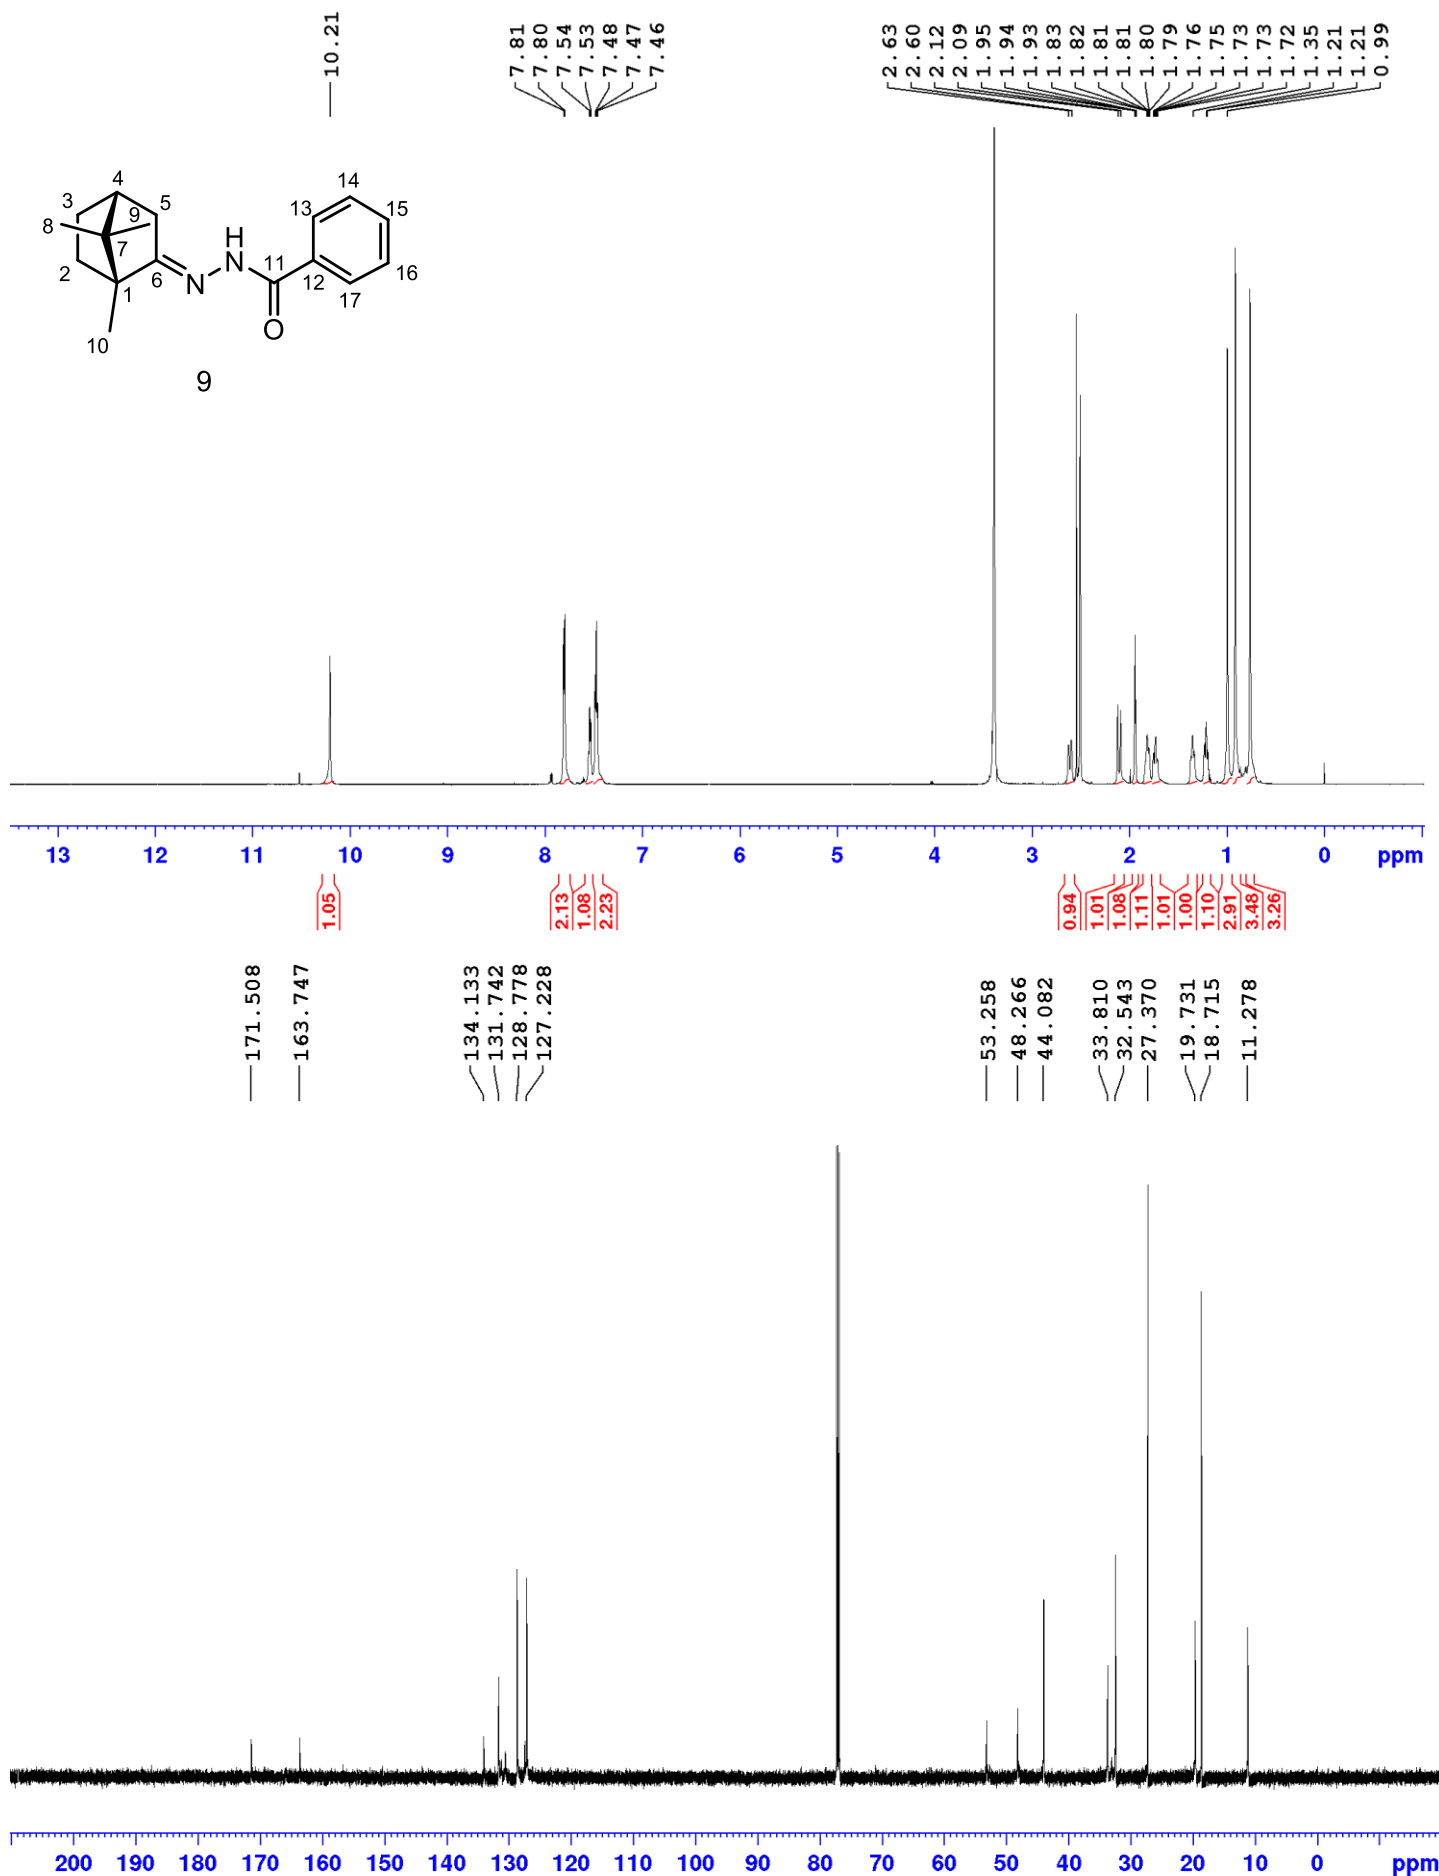

2.5. 4-bromo-N'-[(1R,2E,4R)-1,7,7-trimethylbicyclo[2.2.1]hept-2-ylidene]benzohydrazide **10** (DMSO-d<sub>6</sub>, 400.0 MHz)

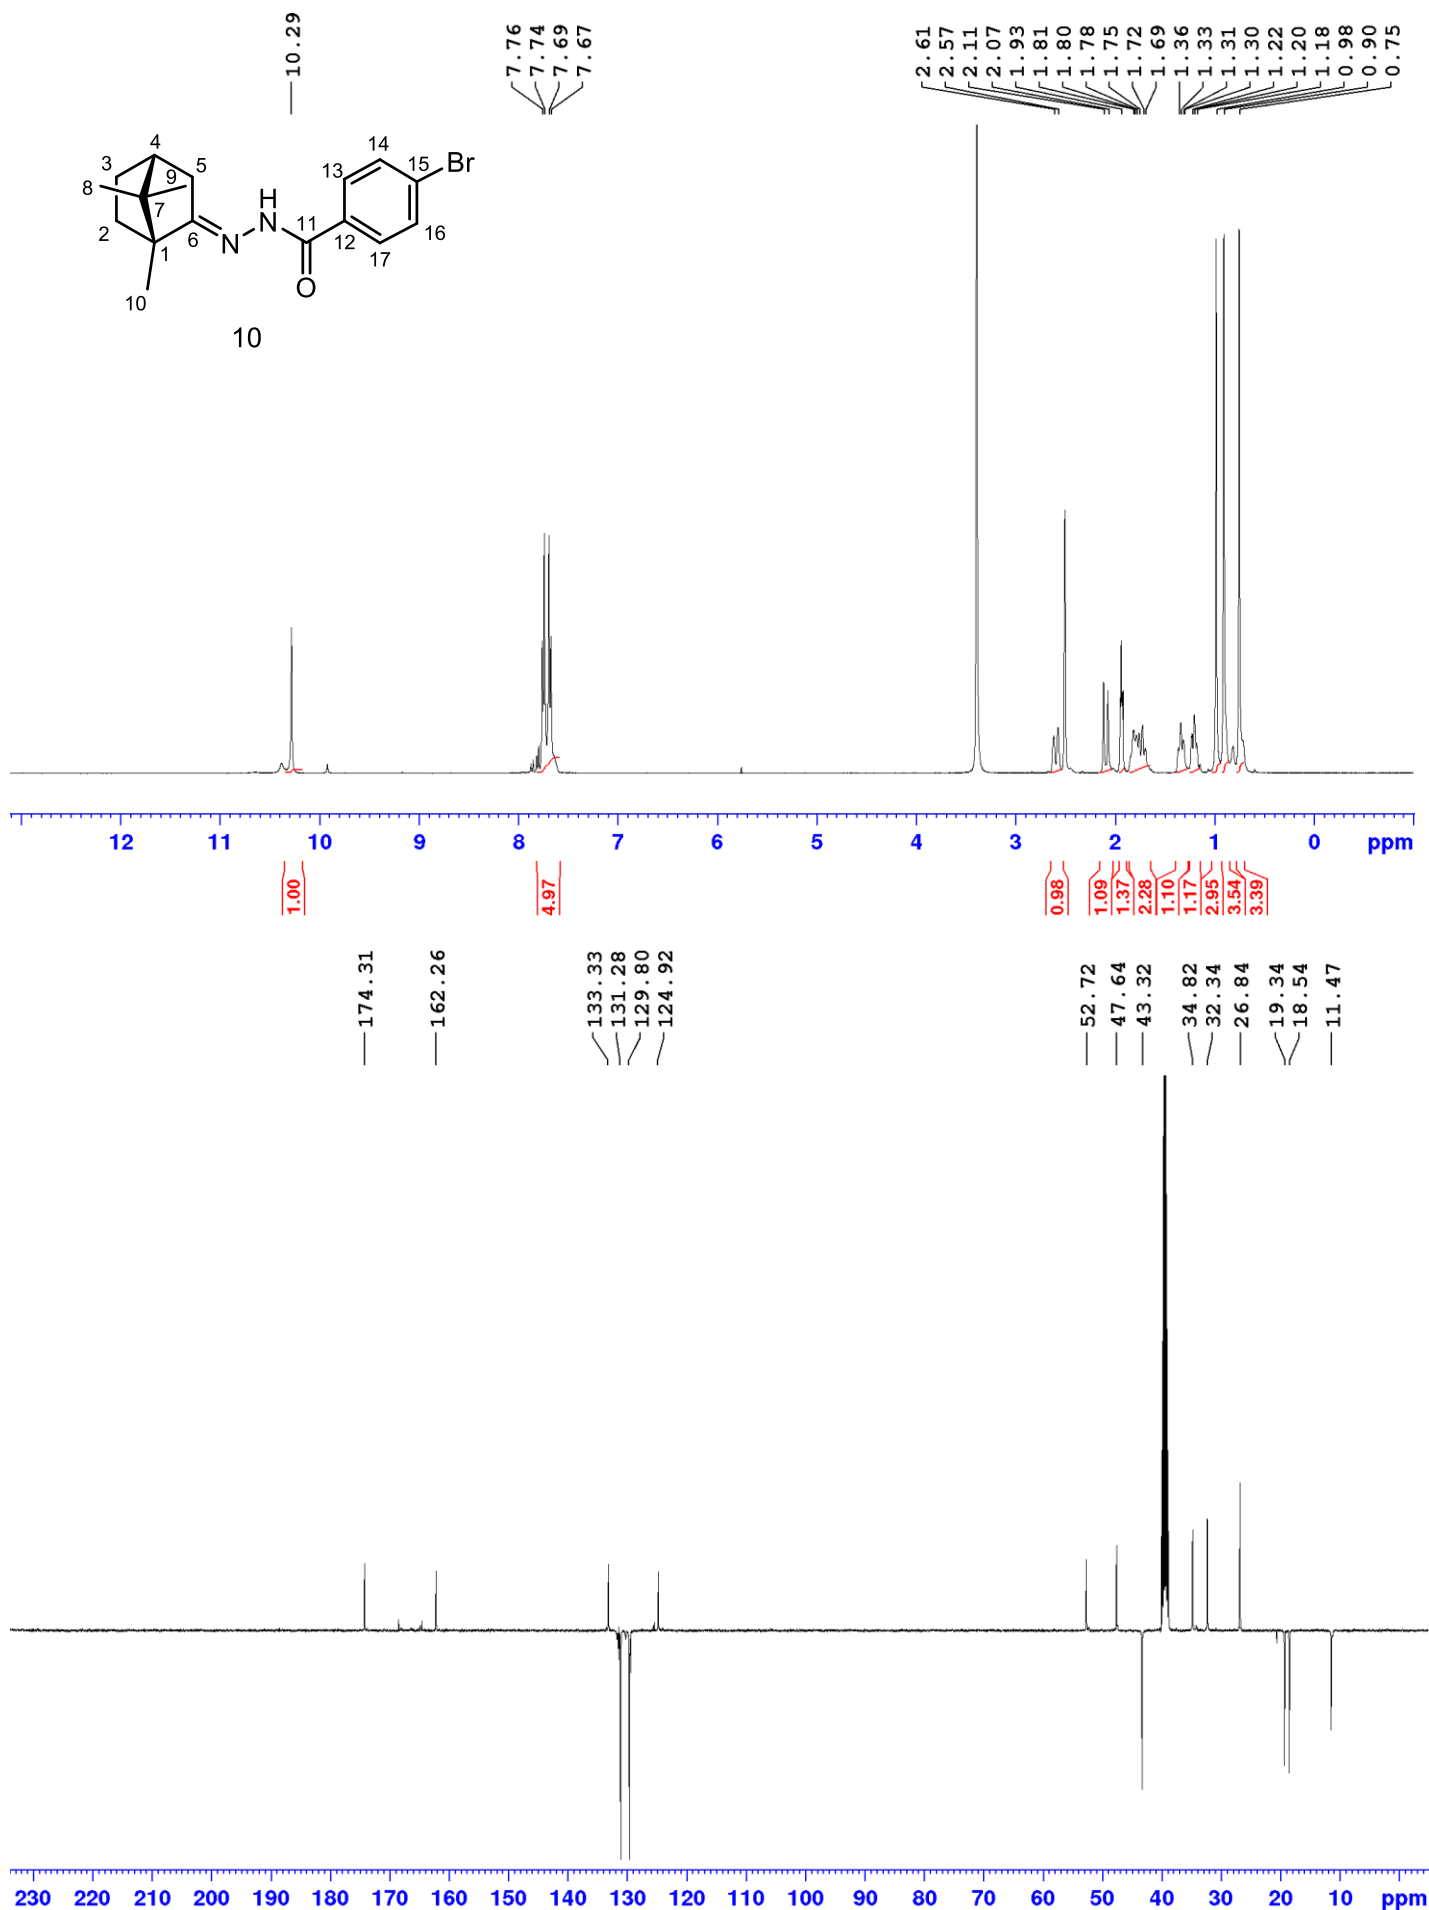



2.6. N'-[(1R,2E,4R)-1,7,7-trimethylbicyclo[2.2.1]hept-2-ylidene]-2-furohydrazide **11** (CDCl<sub>3</sub>, 400.0 MHz)

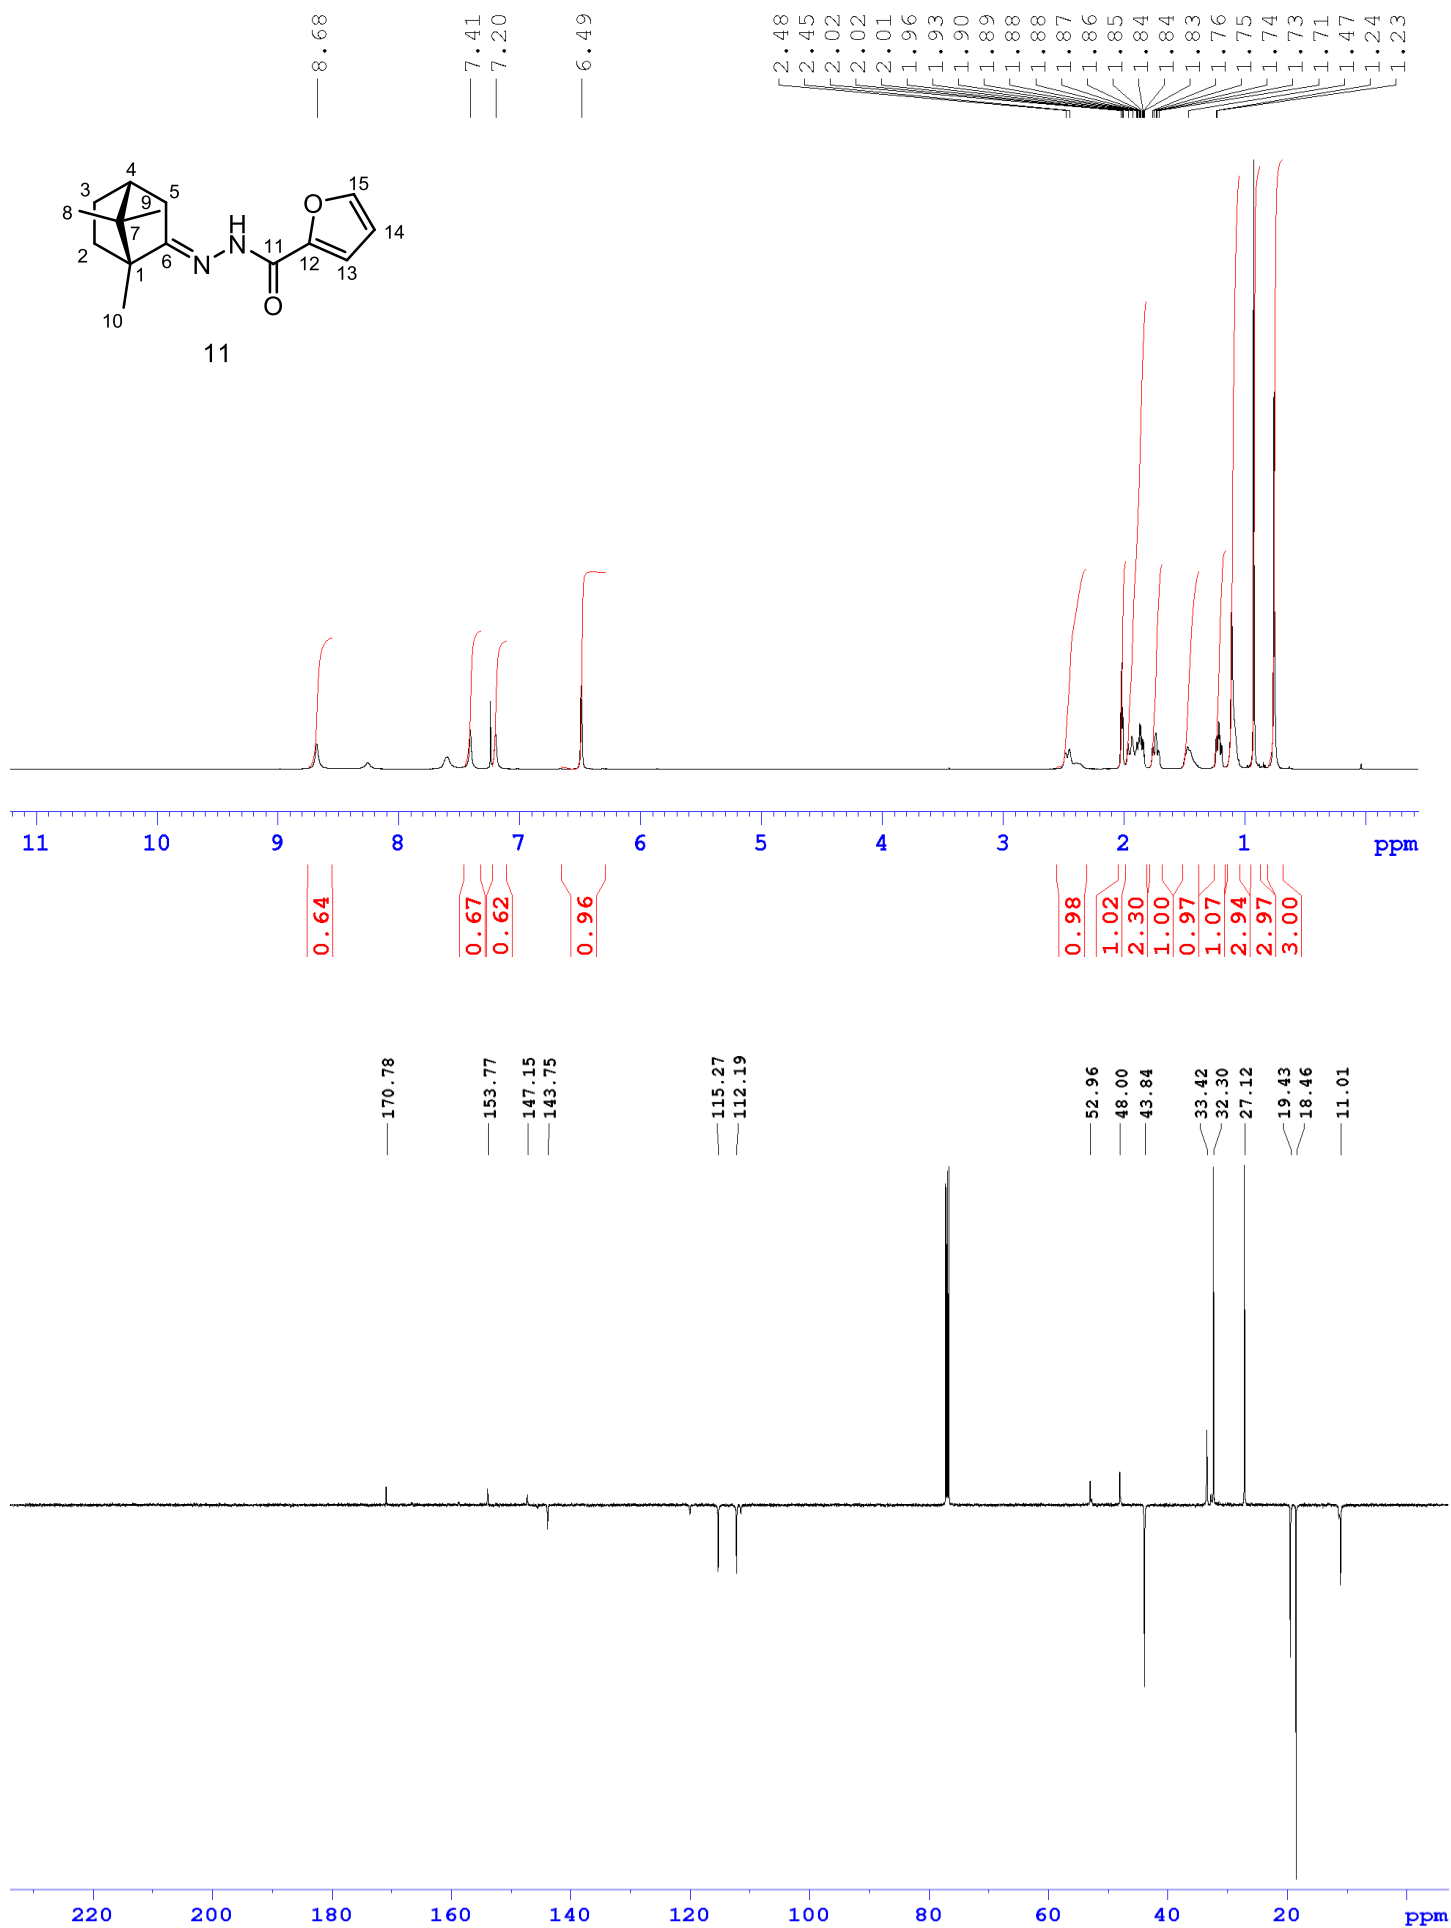

2.7. N'-[(1R,2E,4R)-1,7,7-trimethylbicyclo[2.2.1]hept-2-ylidene]thiophene-2-carbohydrazide **12** (CDCl<sub>3</sub>, 400.0 MHz)

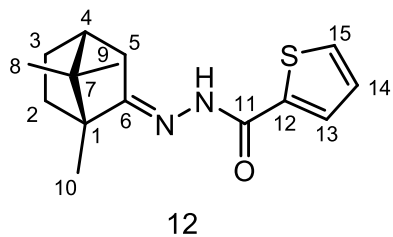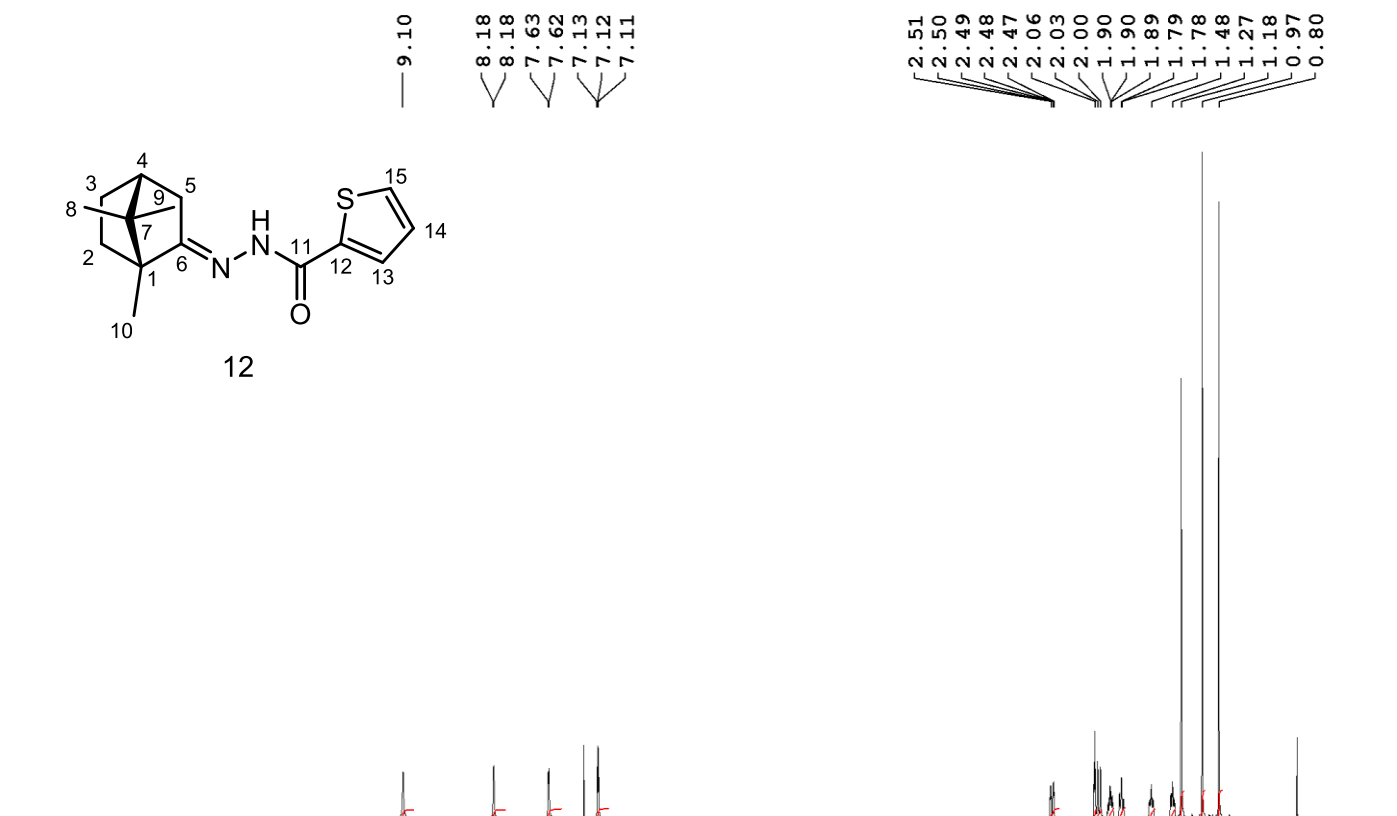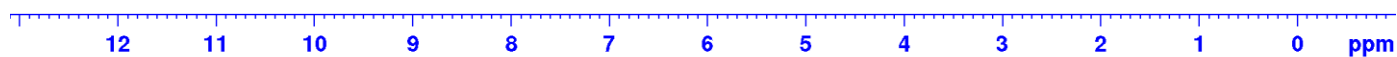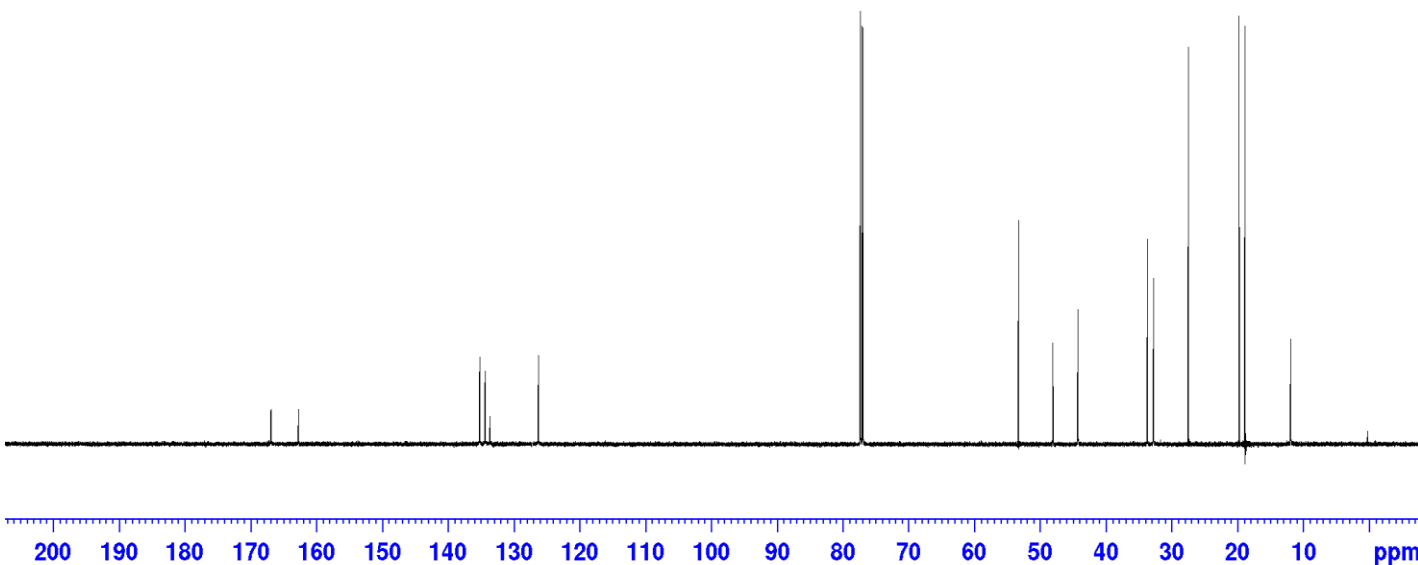

**2.8. A mixture of (3aR,6S,7R,7aS)-2-ethyl-1-oxo-N'-[(1R,2E,4R)-1,7,7-trimethylbicyclo[2.2.1]hept-2-ylidene]-1,2,3,6,7,7a-hexahydro-3a,6-epoxyisoindole-7-carbohydrazide (A) and (3aS,6R,7S,7aR)-2-ethyl-1-oxo-N'-[(1R,2E,4R)-1,7,7-trimethylbicyclo[2.2.1]hept-2-ylidene]-1,2,3,6,7,7a-hexahydro-3a,6-epoxyisoindole-7-carbohydrazide (B) 13 (CDCl<sub>3</sub>, 400.0 MHz)**

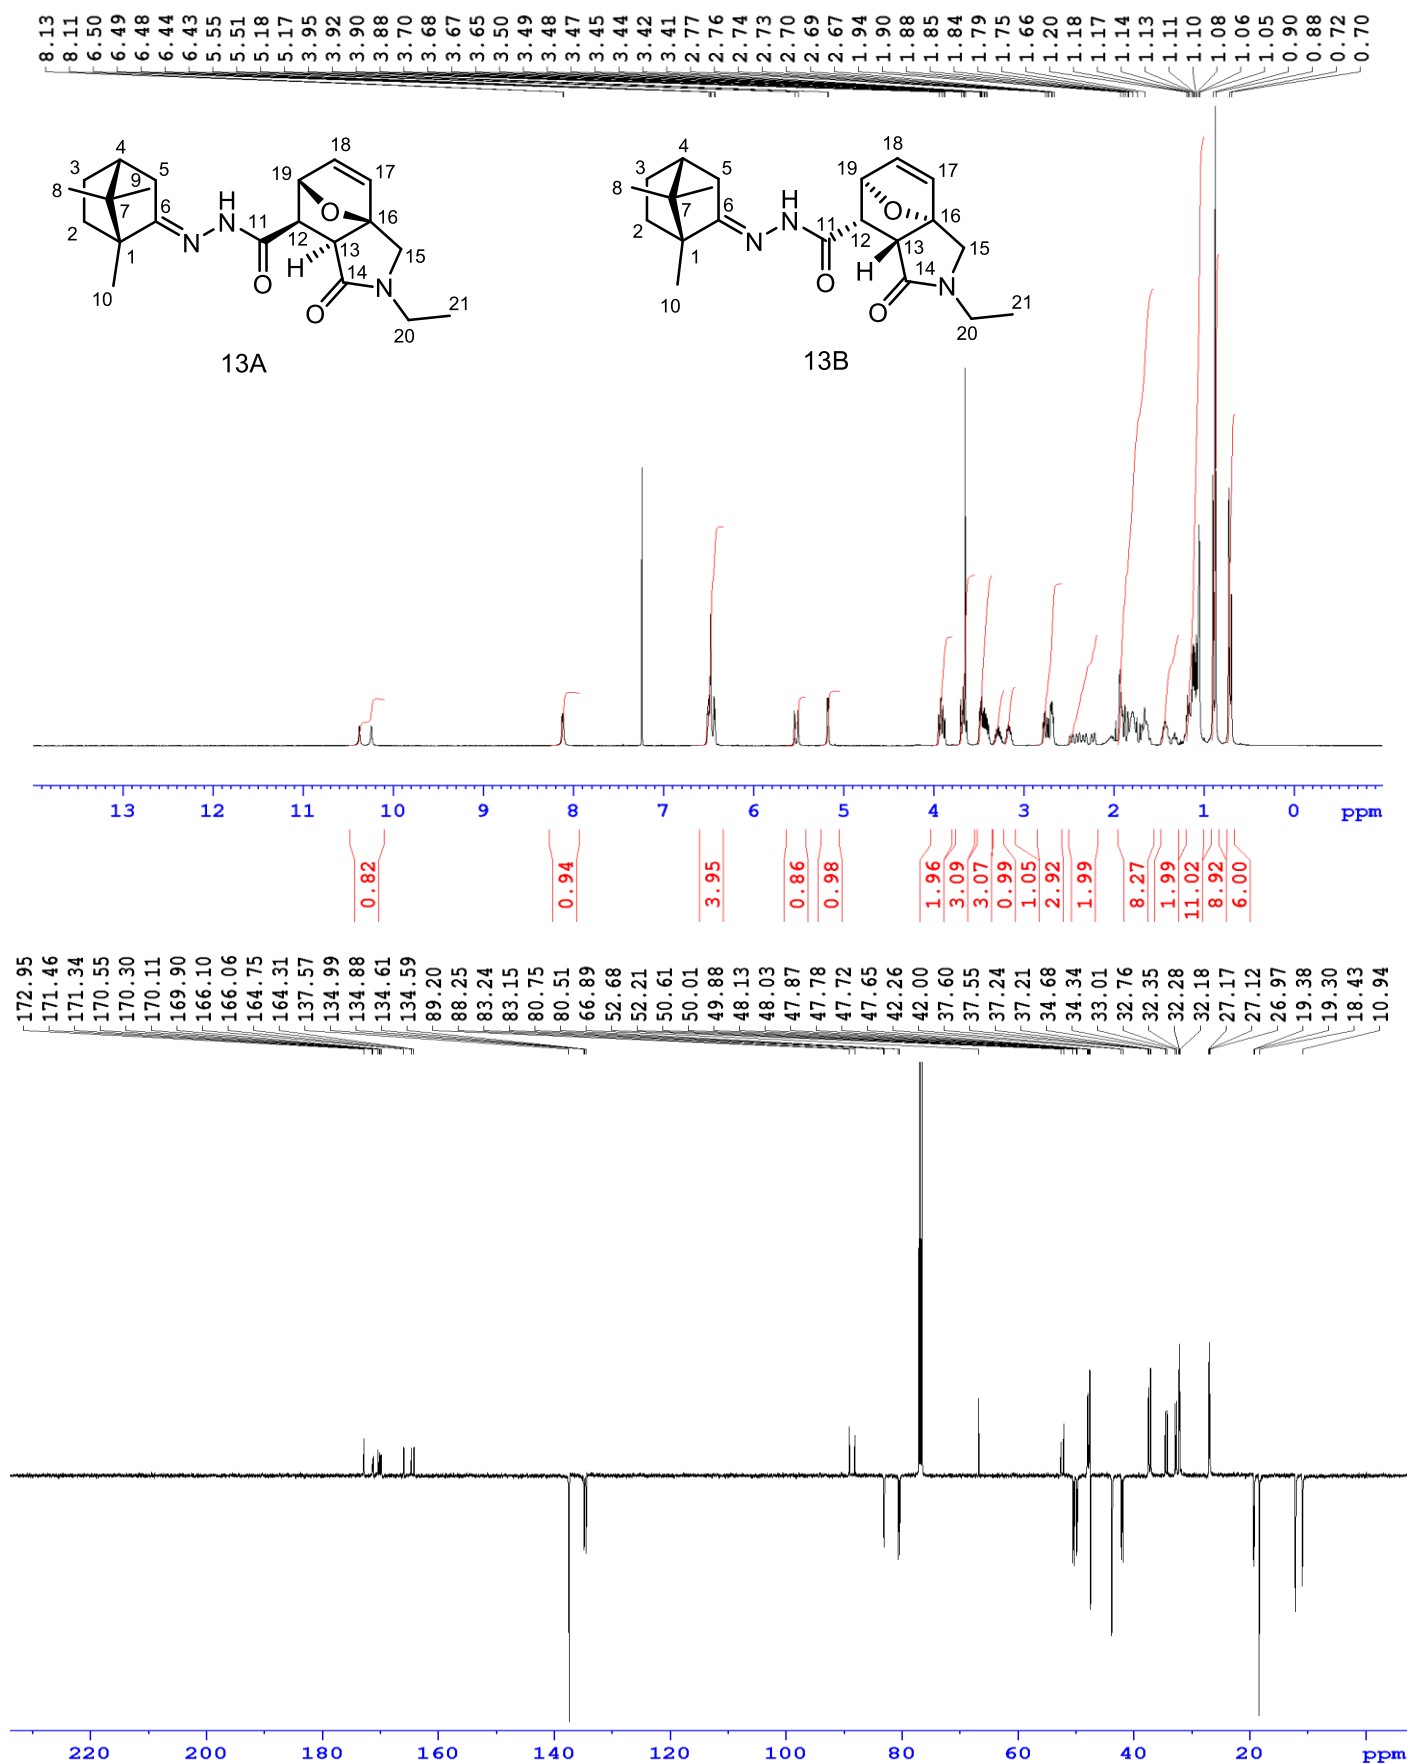

2.9. A mixture of (3aR,6S,7R,7aS)-2-(2-methoxyethyl)-1-oxo-N'-[(1R,2E,4R)-1,7,7-trimethylbicyclo[2.2.1]hept-2-ylidene]-1,2,3,6,7,7a-hexahydro-3a,6-epoxyisoindole-7-carbohydrazide (A) and (3aS,6R,7S,7aR)-2-(2-methoxyethyl)-1-oxo-N'-[(1R,2E,4R)-1,7,7-trimethylbicyclo[2.2.1]hept-2-ylidene]-1,2,3,6,7,7a-hexahydro-3a,6-epoxyisoindole-7-carbohydrazide (B) **14** (CDCl<sub>3</sub>, 400.0 MHz)

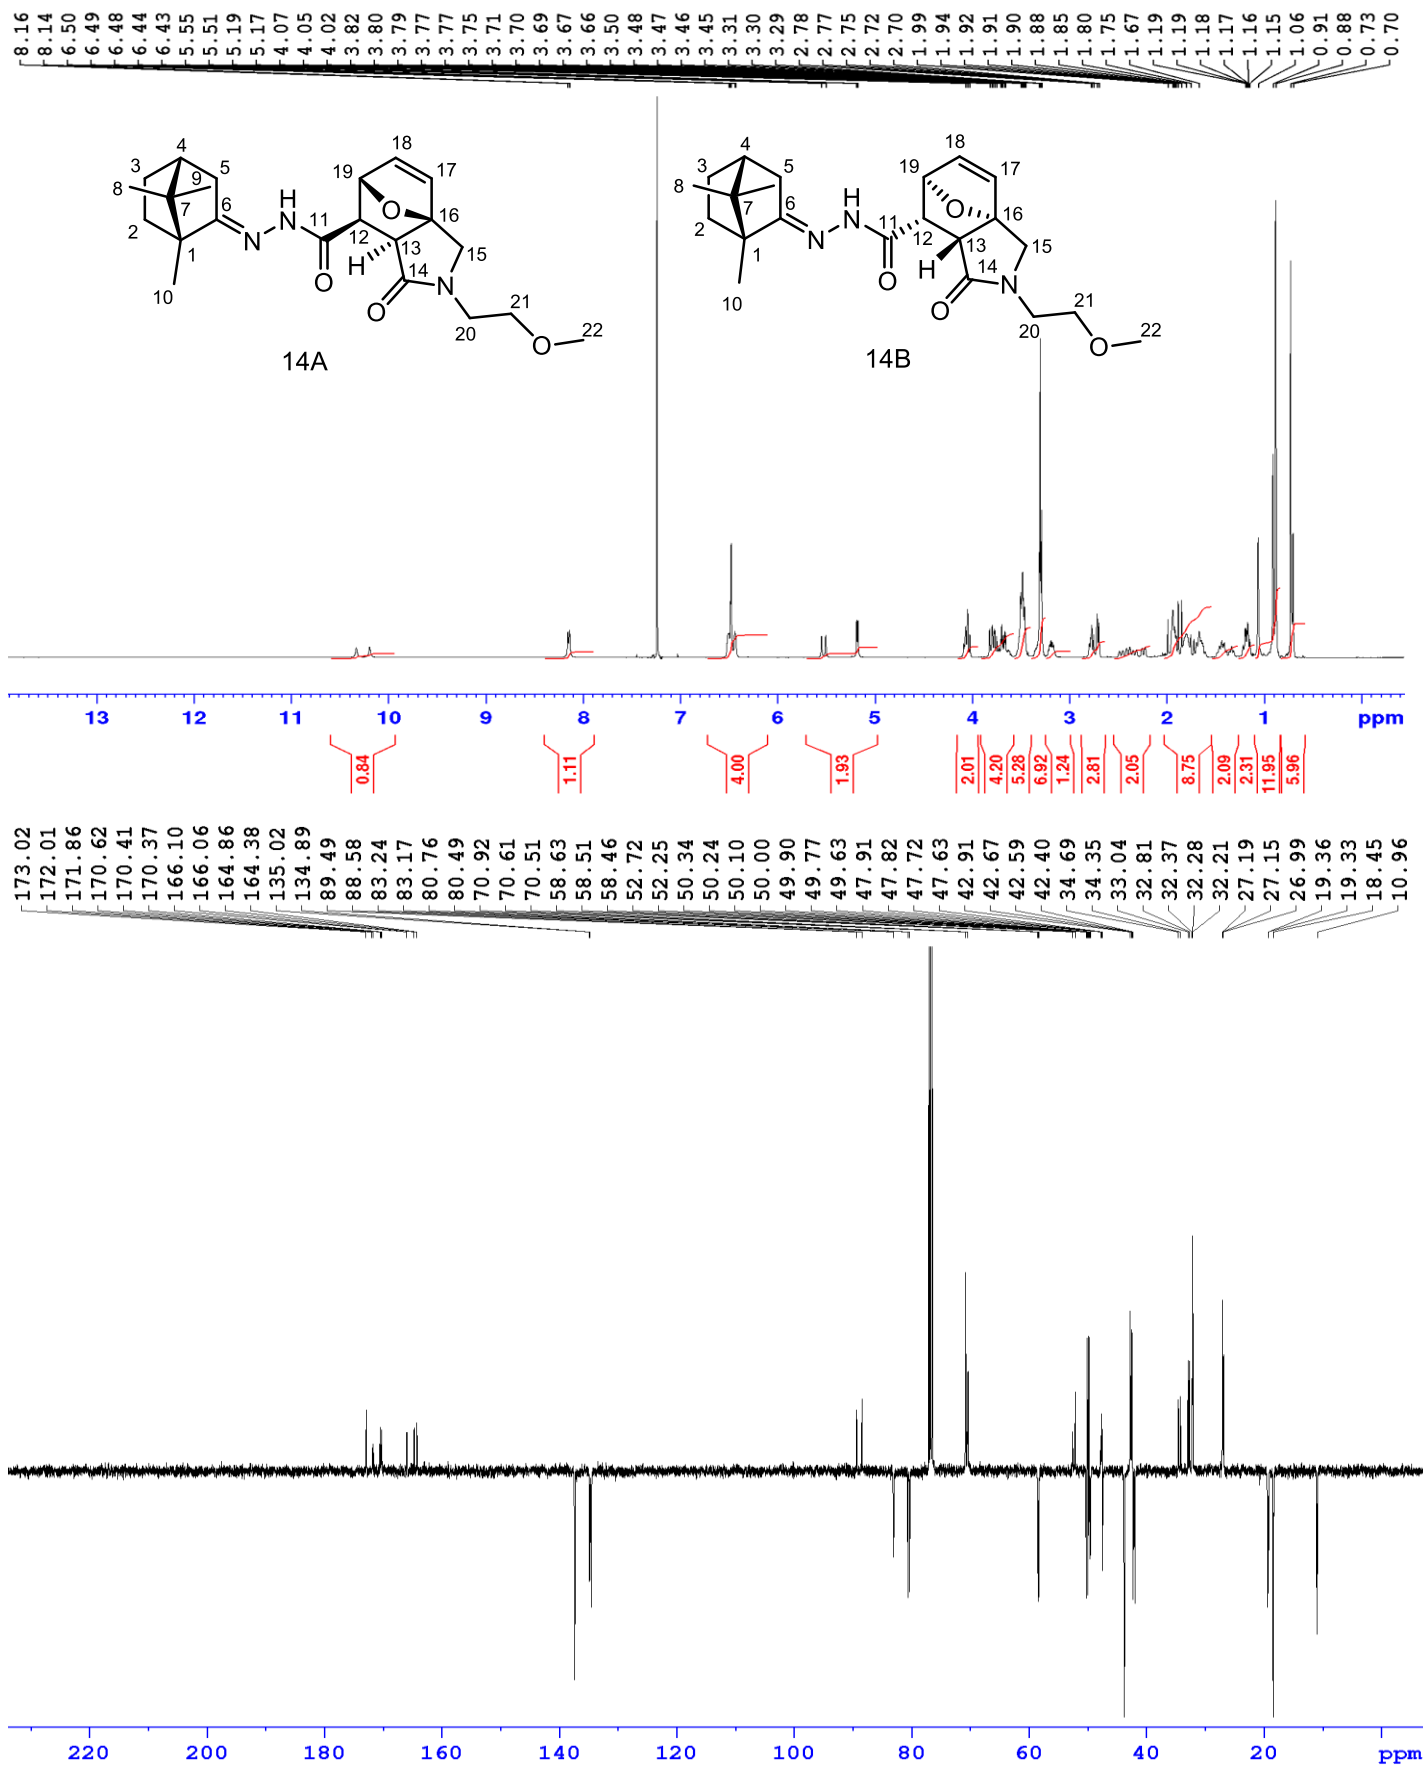

**2.10. A mixture of (3aR,6S,7R,7aS)-6-methyl-1-oxo-2-phenyl-N'-[(1R,2E,4R)-1,7,7-trimethylbicyclo[2.2.1]hept-2-ylidene]-1,2,3,6,7,7a-hexahydro-3a,6-epoxyisoindole-7-carbohydrazide (A) and (3aS,6R,7S,7aR)-6-methyl-1-oxo-2-phenyl-N'-[(1R,2E,4R)-1,7,7-trimethylbicyclo[2.2.1]hept-2-ylidene]-1,2,3,6,7,7a-hexahydro-3a,6-epoxyisoindole-7-carbohydrazide (B) 15 (CDCl<sub>3</sub>, 400.0 MHz)**

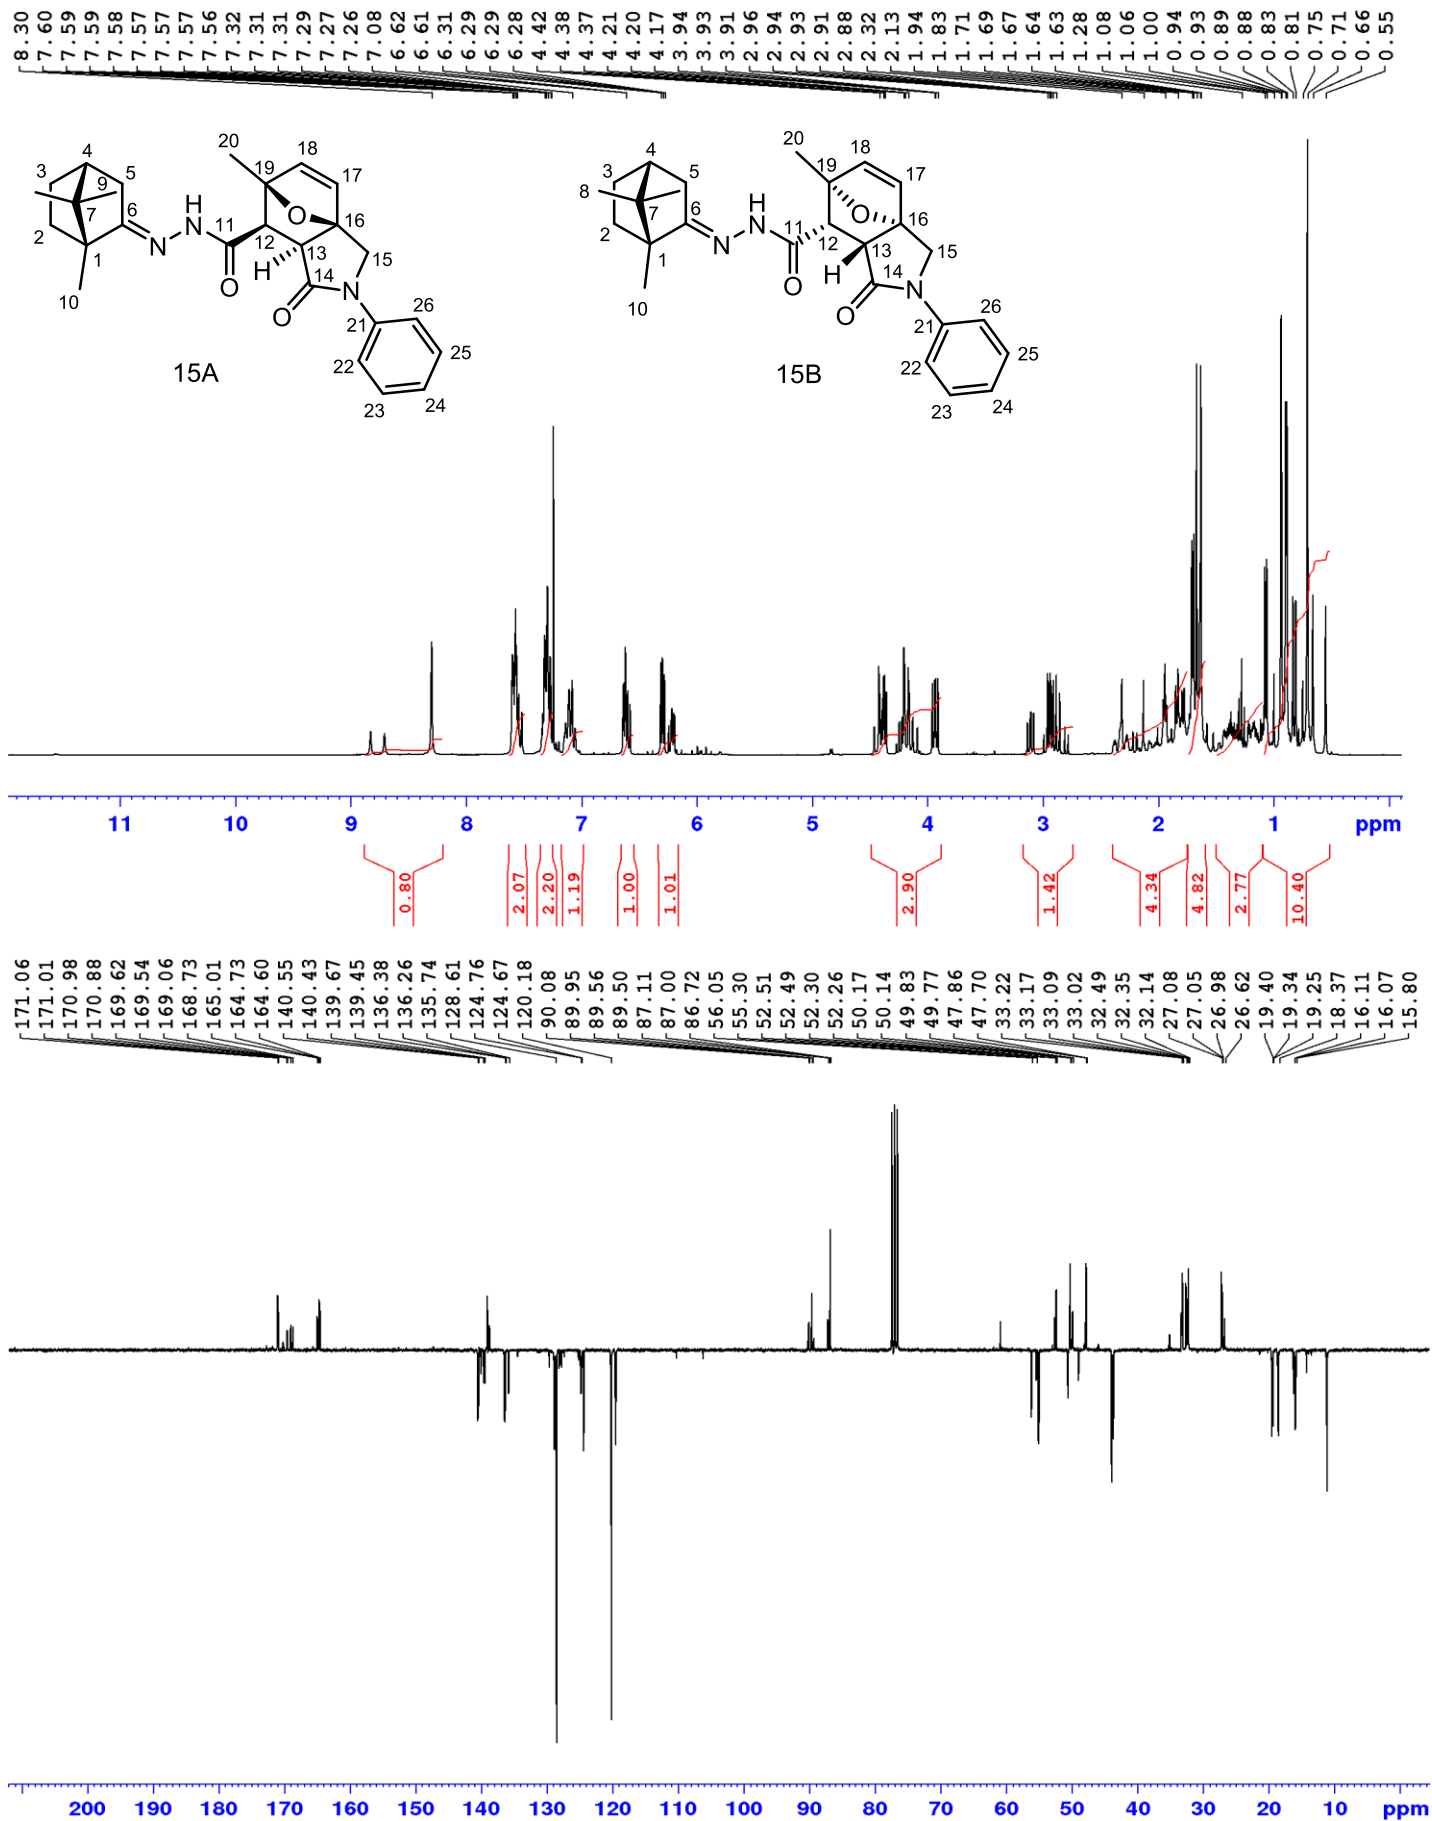

**2.11. A mixture of (3aR,6S,7R,7aS)-1-oxo-2-(2-phenylethyl)-N'-[(1R,2E,4R)-1,7,7-trimethylbicyclo[2.2.1]hept-2-ylidene]-1,2,3,6,7,7a-hexahydro-3a,6-epoxyisoindole-7-carbohydrazide (A) and (3aS,6R,7S,7aR)-1-oxo-2-(2-phenylethyl)-N'-[(1R,2E,4R)-1,7,7-trimethylbicyclo[2.2.1]hept-2-ylidene]-1,2,3,6,7,7a-hexahydro-3a,6-epoxyisoindole-7-carbohydrazide (B) 16 (DMSO-d<sub>6</sub>, 400.0 MHz)**

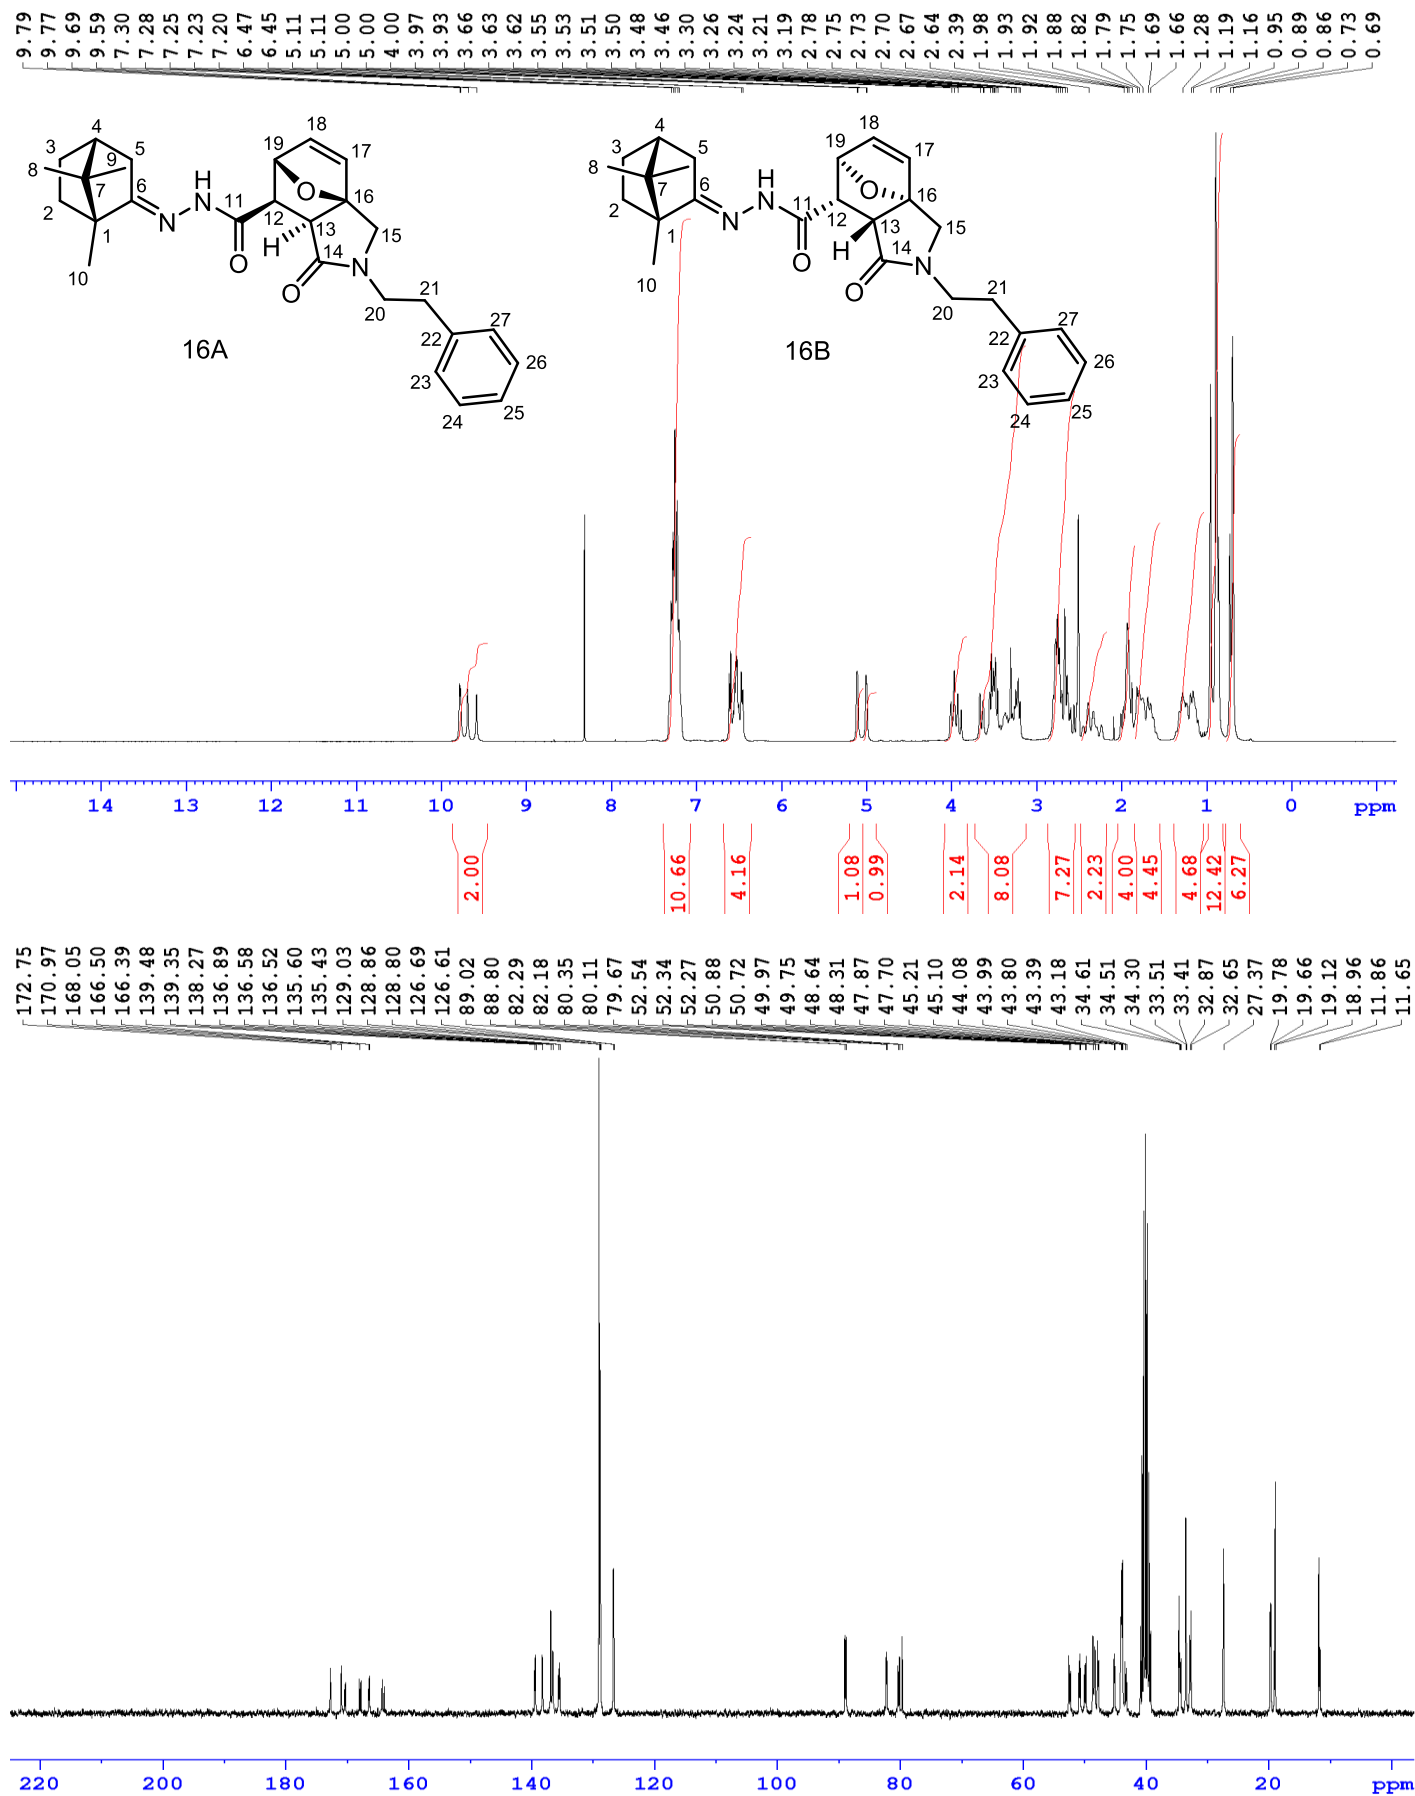

<sup>1</sup>H NMR (DMSO-d<sub>6</sub>, 300.1 MHz)

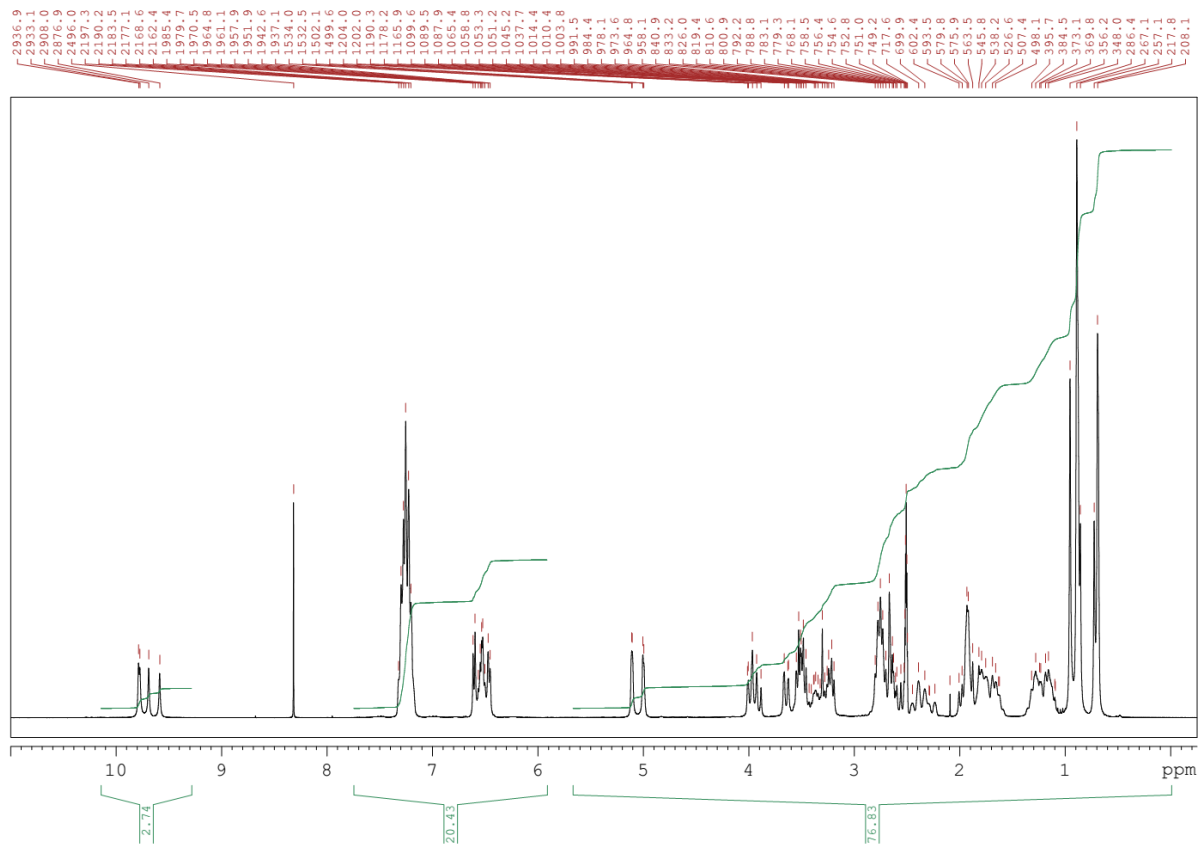

<sup>1</sup>H NMR (DMSO-d<sub>6</sub>, 300.1 MHz)

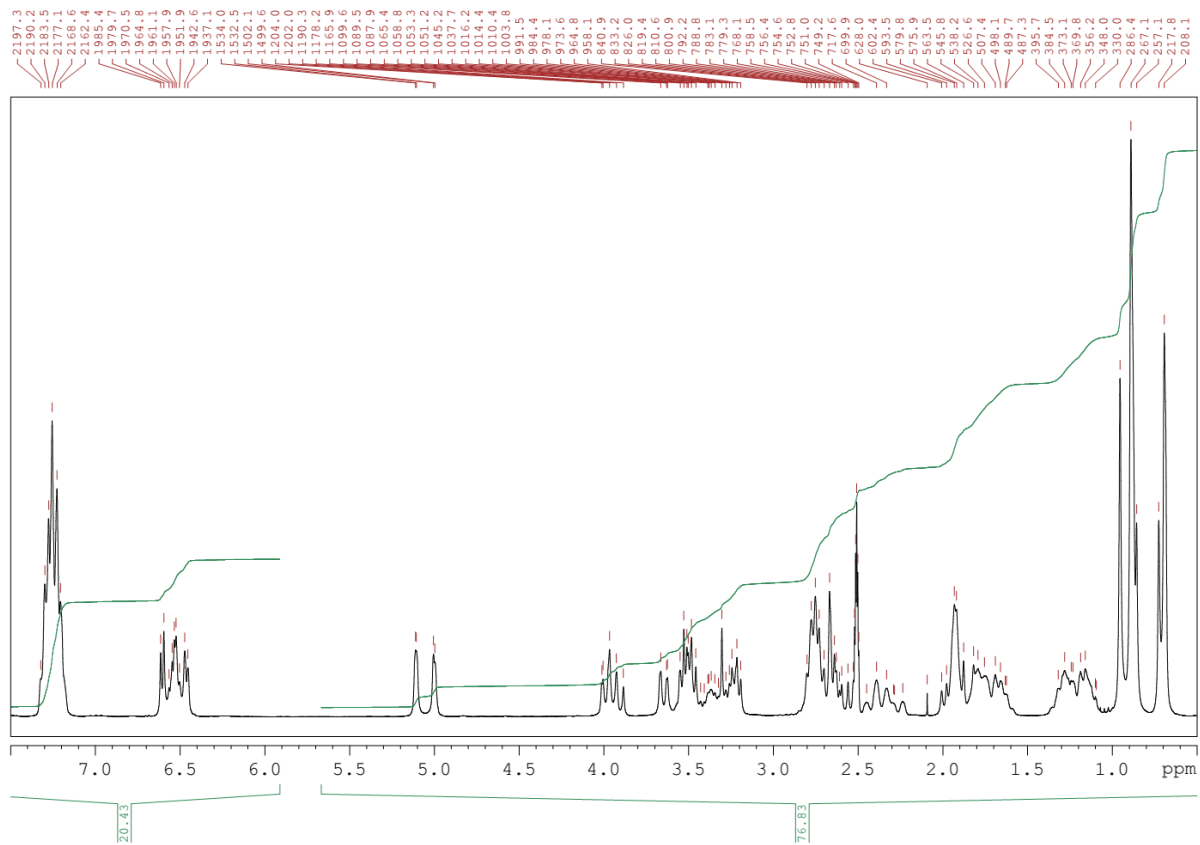

$^{13}\text{C}\{^1\text{H}\}$  NMR (DMSO- $d_6$ , 75.5 MHz)

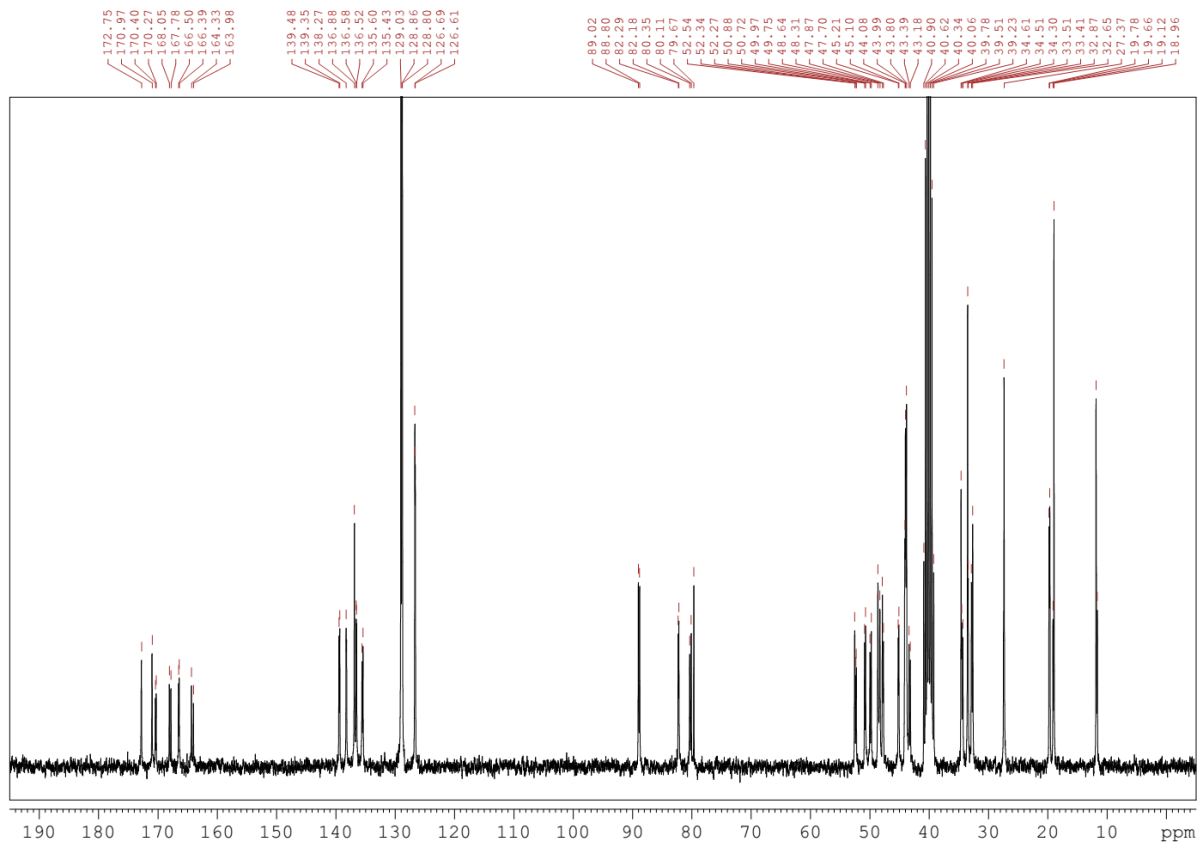

$^{13}\text{C}\{^1\text{H}\}$  NMR (DMSO- $d_6$ , 75.5 MHz)

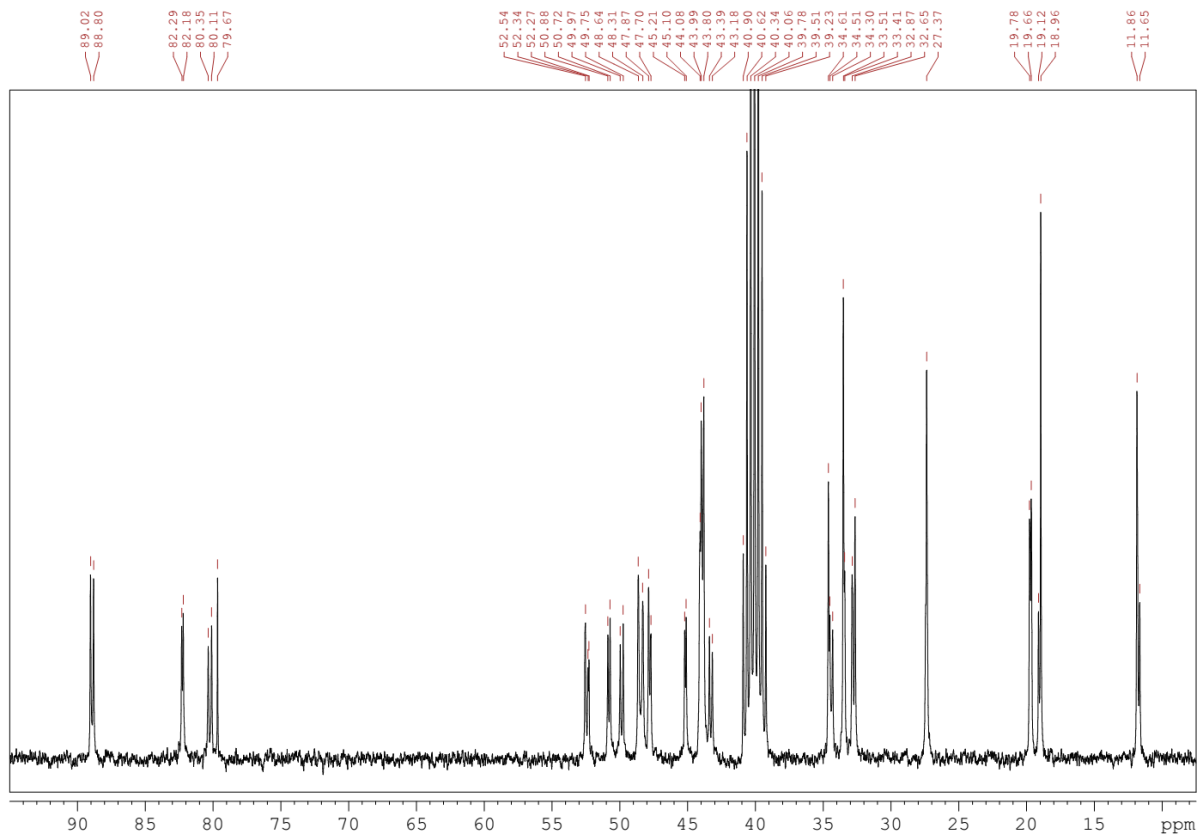



DEPT-135 NMR (DMSO-*d*<sub>6</sub>, 75.5 MHz)

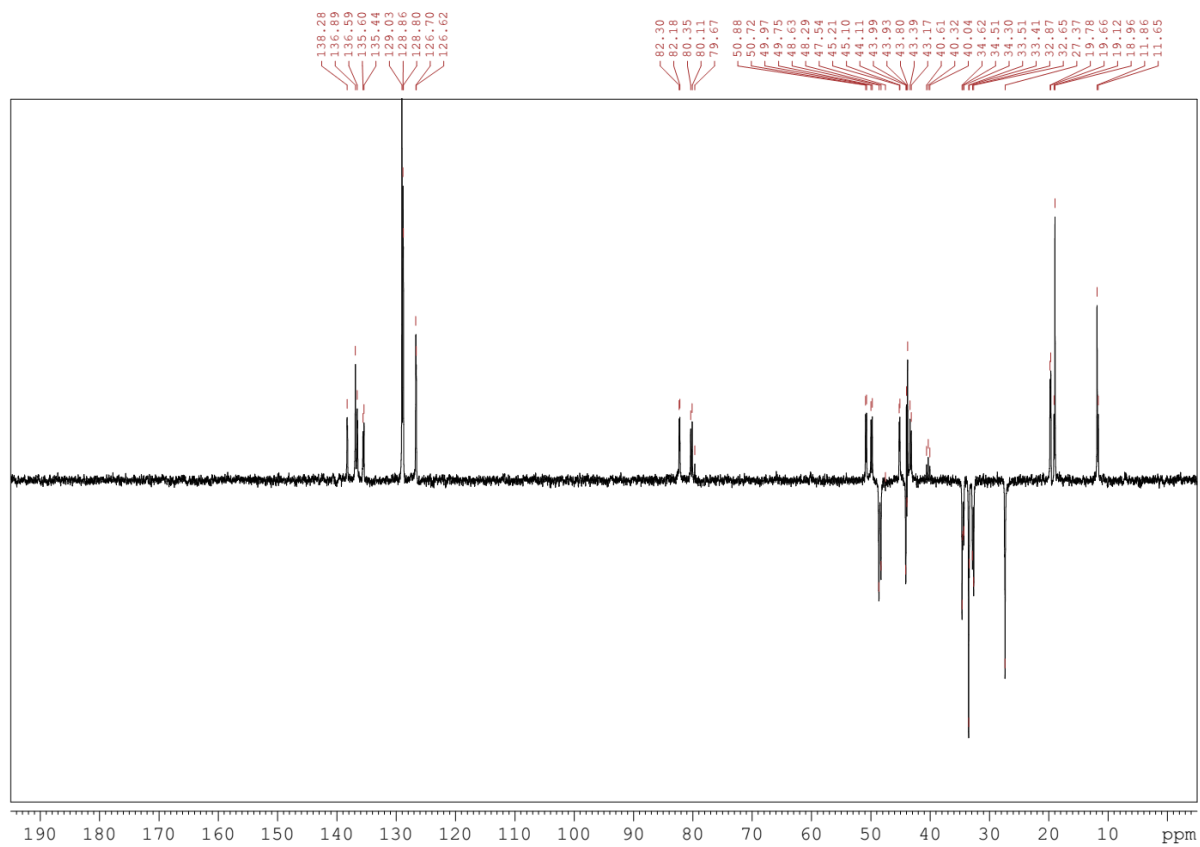

2D <sup>1</sup>H,<sup>1</sup>H-COSY (DMSO-*d*<sub>6</sub>, 300.1 MHz)

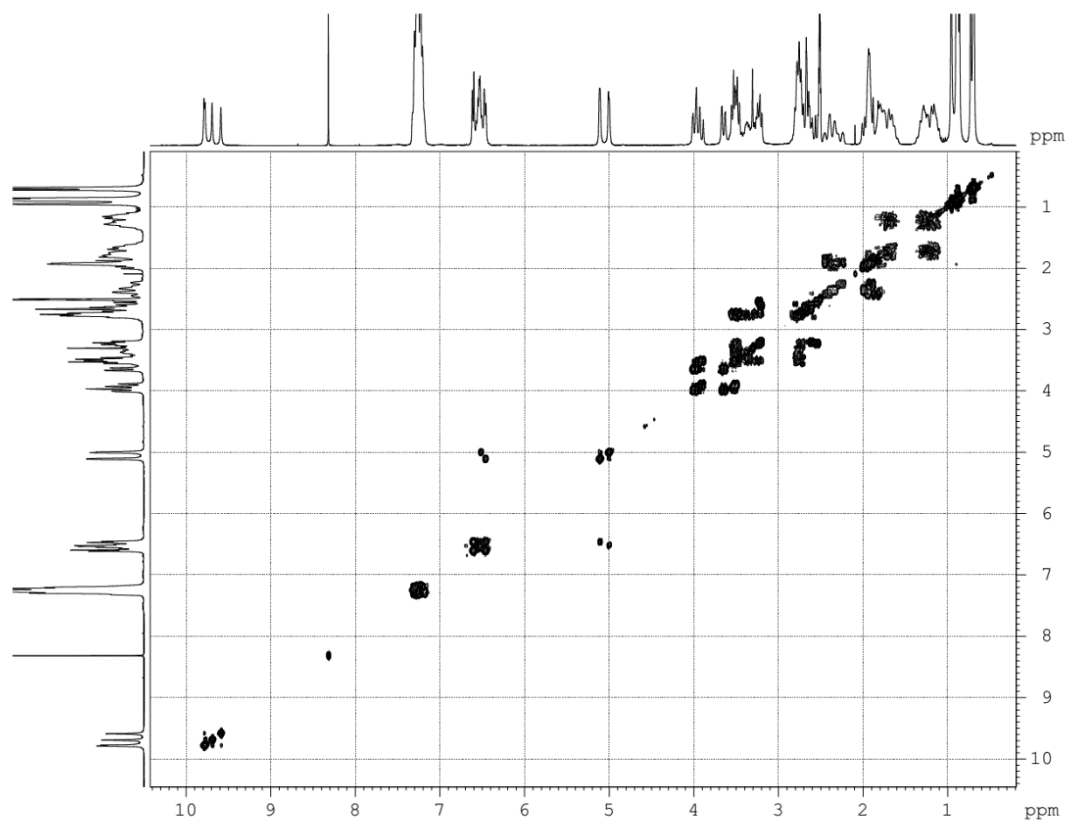

2D  $^1\text{H}$ ,  $^1\text{H}$ -COSY (DMSO- $d_6$ , 300.1 MHz)

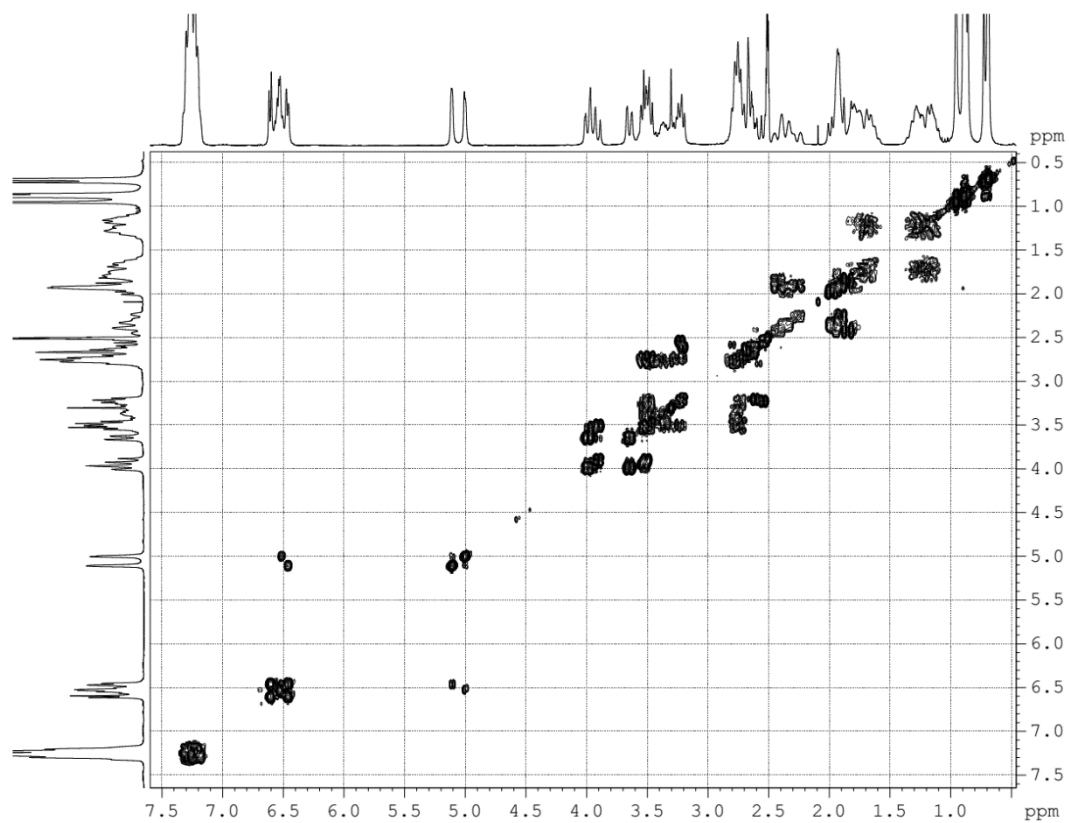

2D  $^1\text{H}$ ,  $^1\text{H}$ -TOCSY (DMSO- $d_6$ , 300.1 MHz)

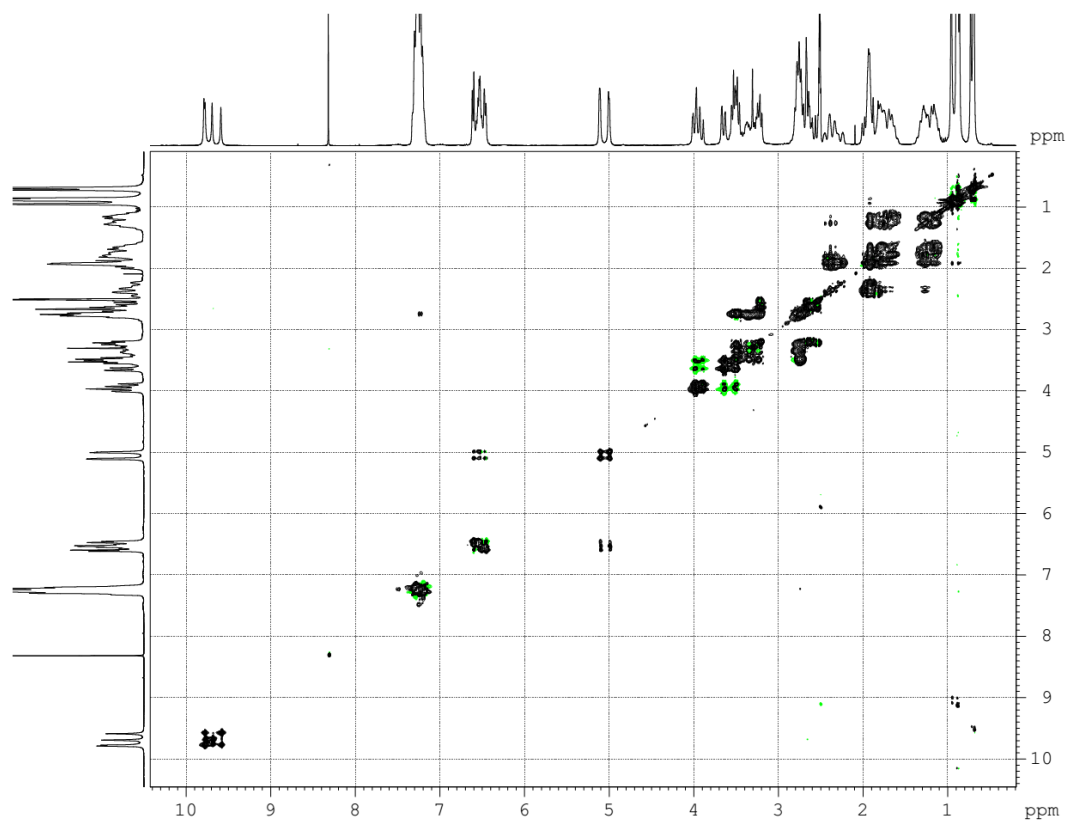

2D  $^1\text{H}$ ,  $^1\text{H}$ -NOESY (DMSO- $d_6$ , 300.1 MHz)

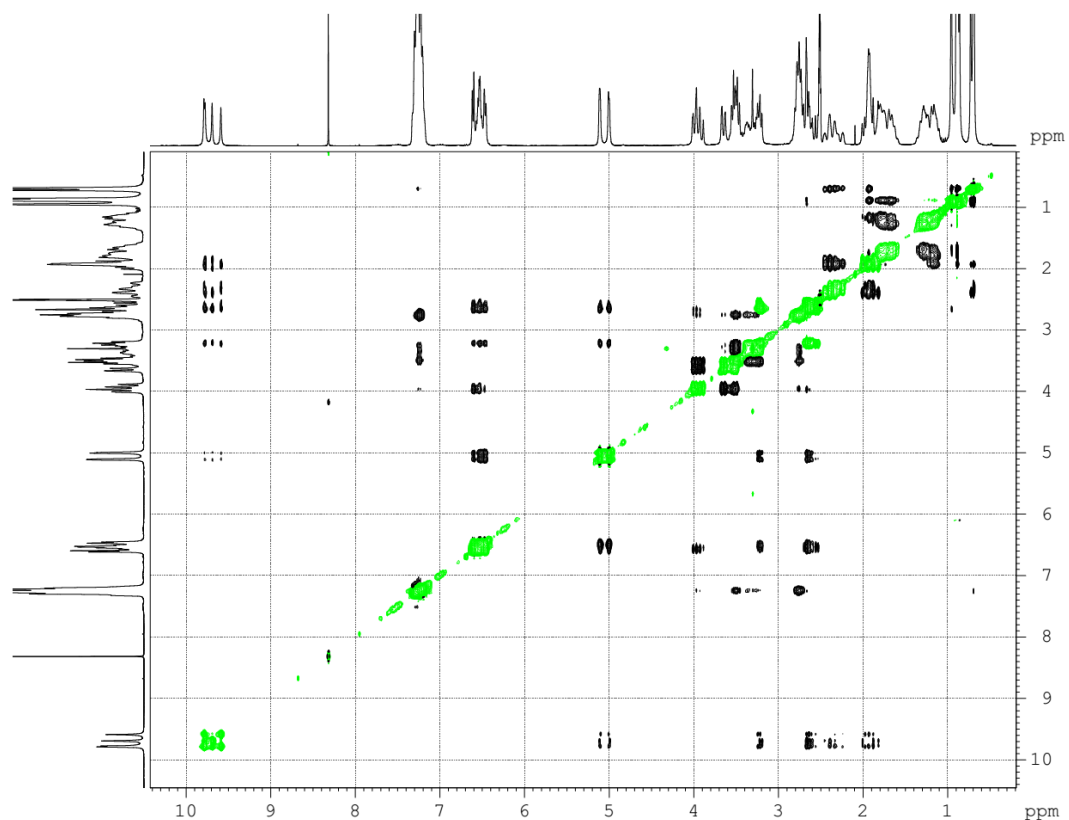

2D  $^1\text{H}$ ,  $^1\text{H}$ -NOESY (DMSO- $d_6$ , 300.1 MHz)

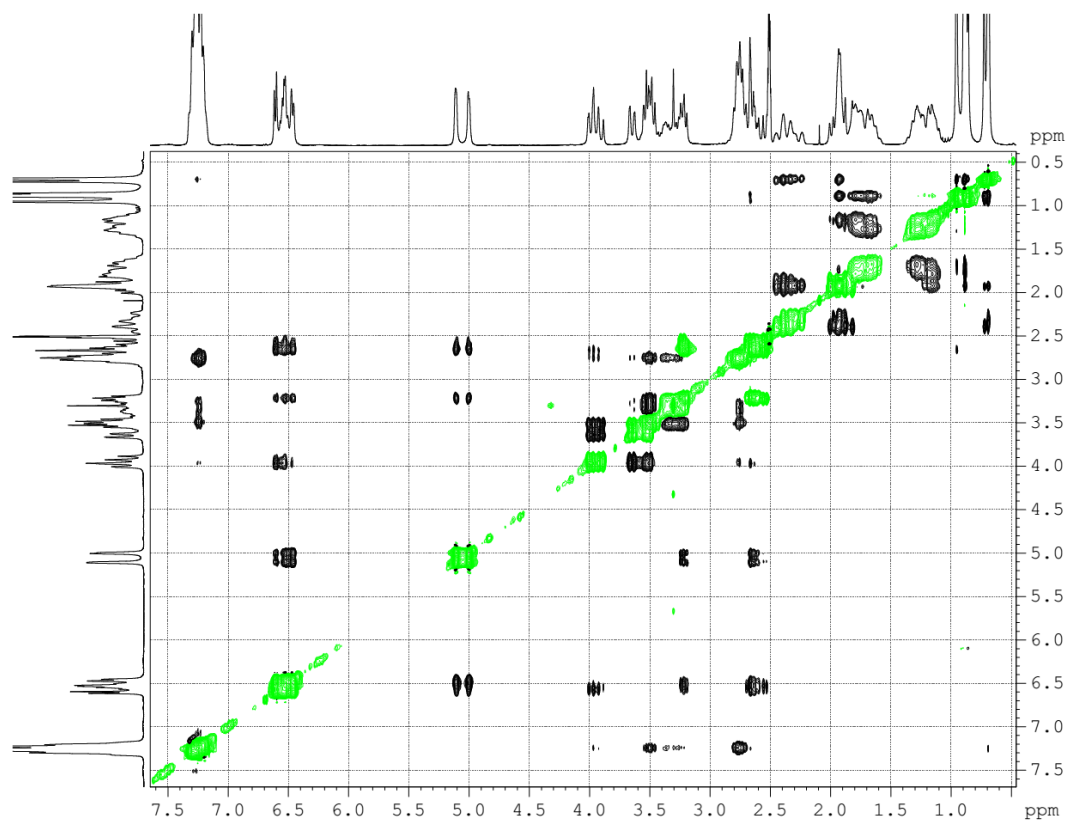

2D  $^1\text{H}$ ,  $^{13}\text{C}$ -edited-HSQC (DMSO- $d_6$ , 300.1 & 75.5 MHz)

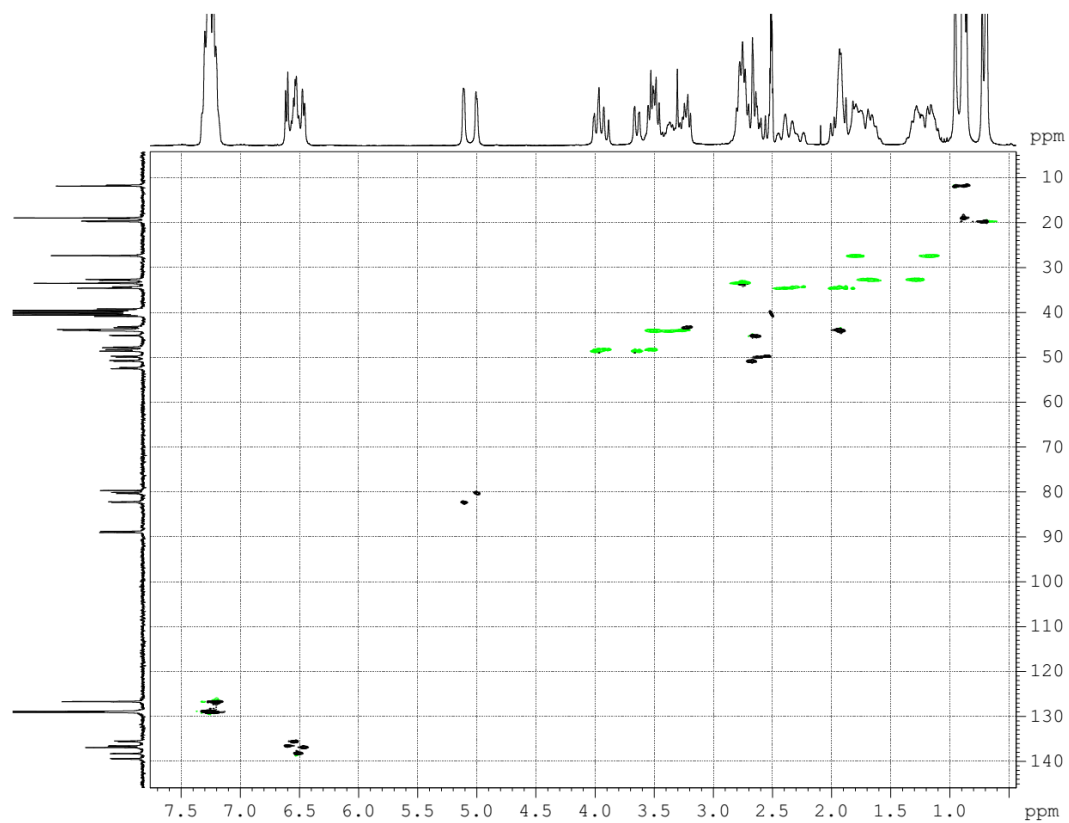

2D  $^1\text{H}$ ,  $^{13}\text{C}$ -edited-HSQC (DMSO- $d_6$ , 300.1 & 75.5 MHz)

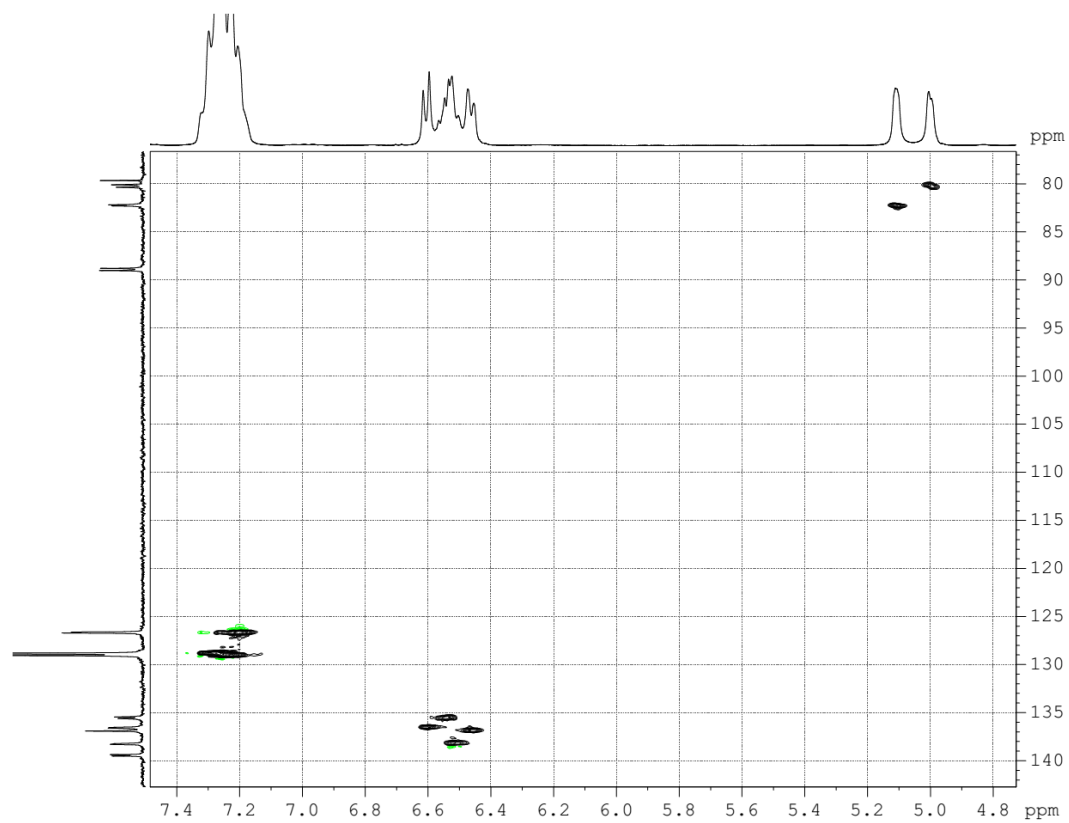

2D  $^1\text{H}$ ,  $^{13}\text{C}$ -edited-HSQC (DMSO- $d_6$ , 300.1 & 75.5 MHz)

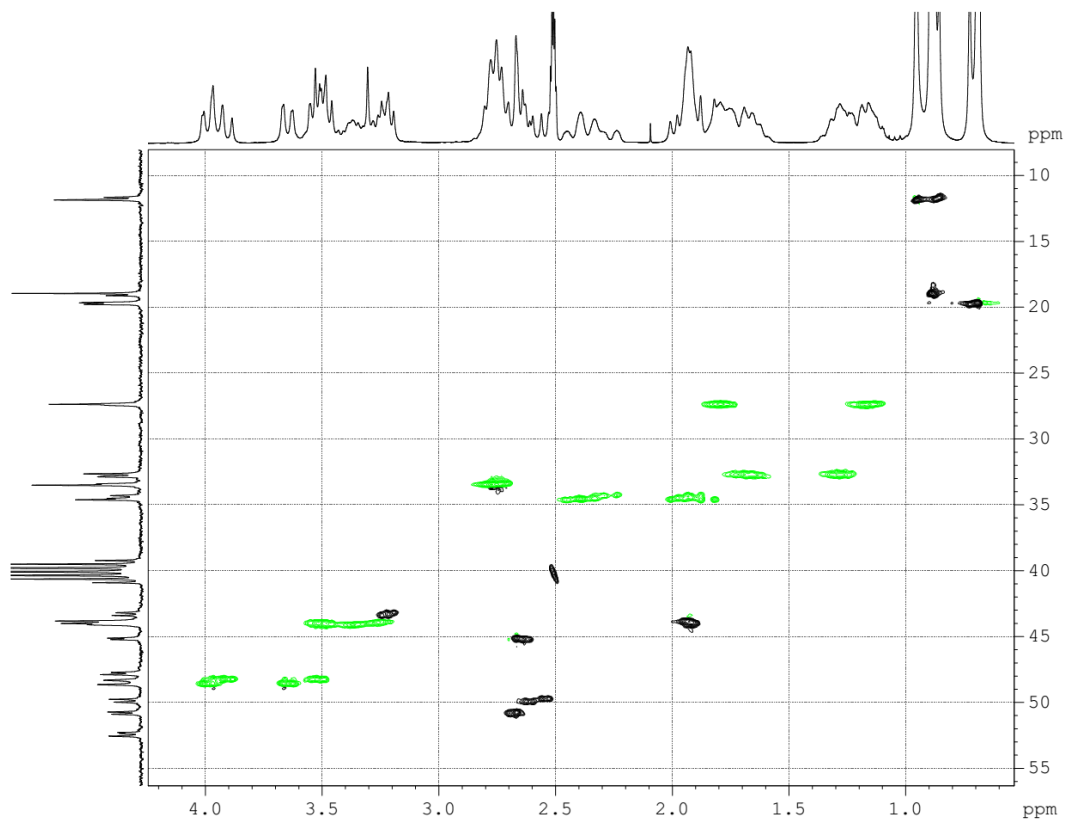

2D  $^1\text{H}$ ,  $^{13}\text{C}$ -HMBC (DMSO- $d_6$ , 300.1 & 75.5 MHz)

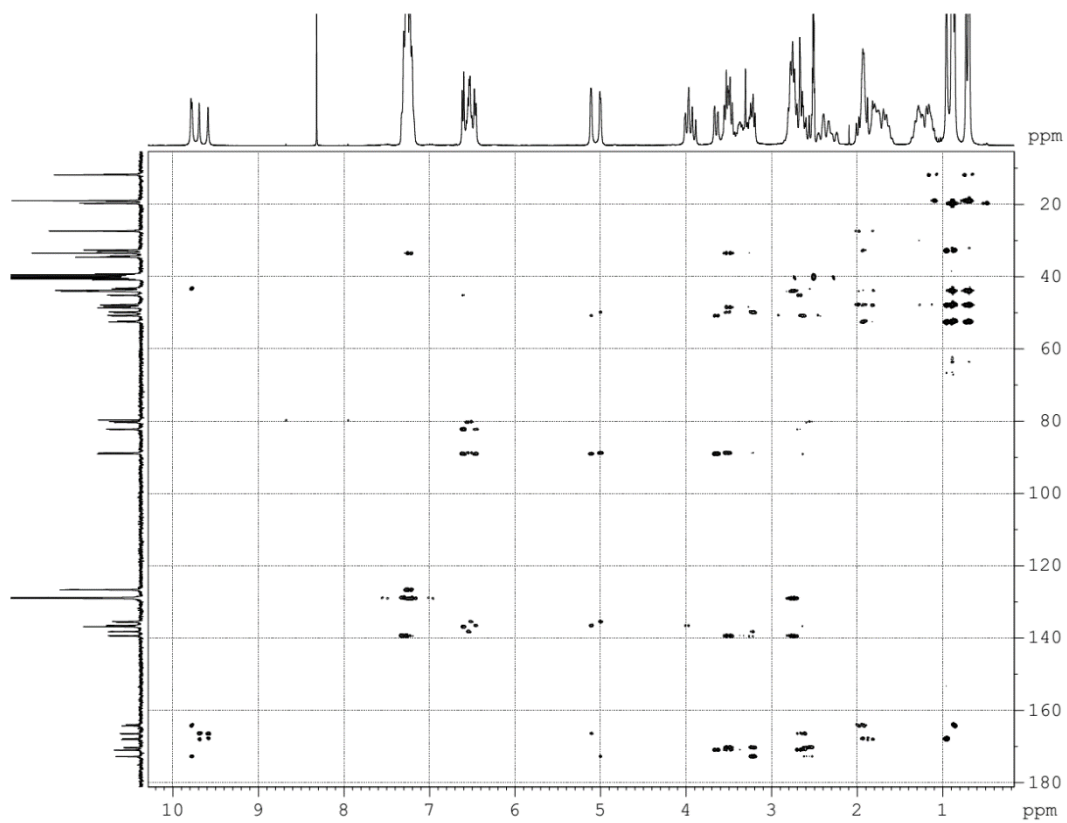

2D  $^1\text{H}$ ,  $^{13}\text{C}$ -HMBC (DMSO- $d_6$ , 300.1 & 75.5 MHz)

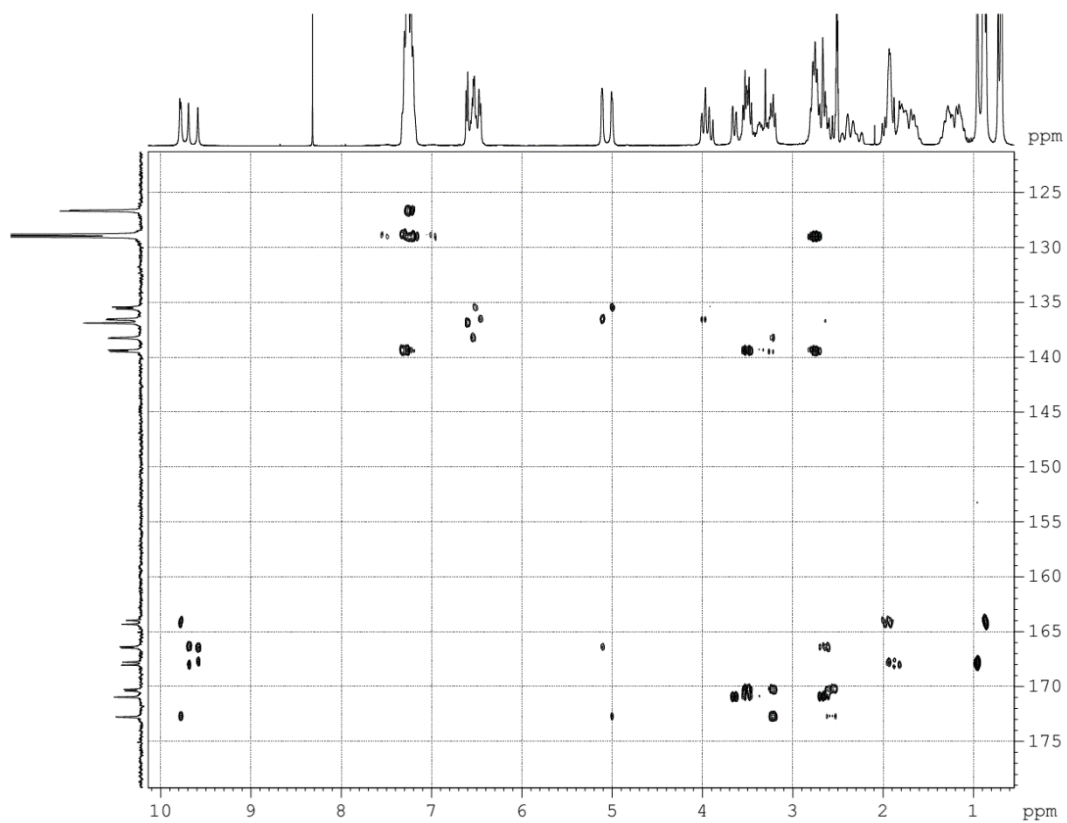

2D  $^1\text{H}$ ,  $^{13}\text{C}$ -HMBC (DMSO- $d_6$ , 300.1 & 75.5 MHz)

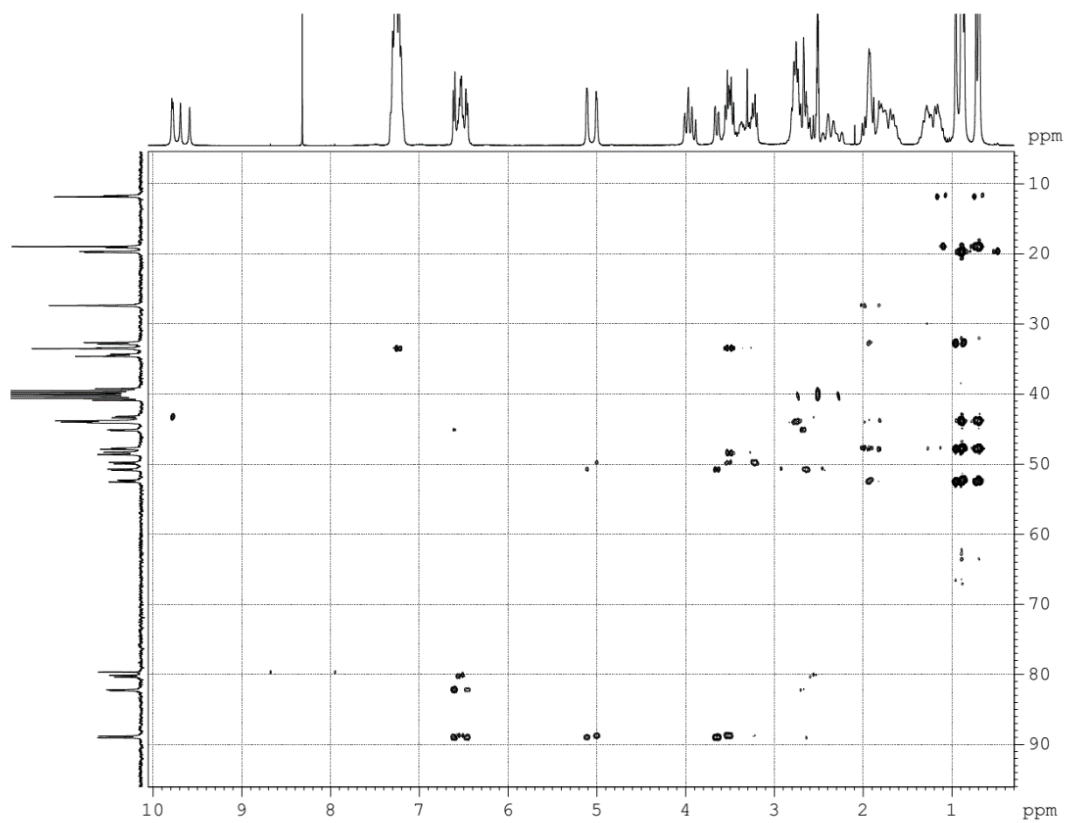

2D  $^1\text{H}$ ,  $^{13}\text{C}$ -HSQC-COSY (DMSO- $d_6$ , 300.1 & 75.5 MHz)

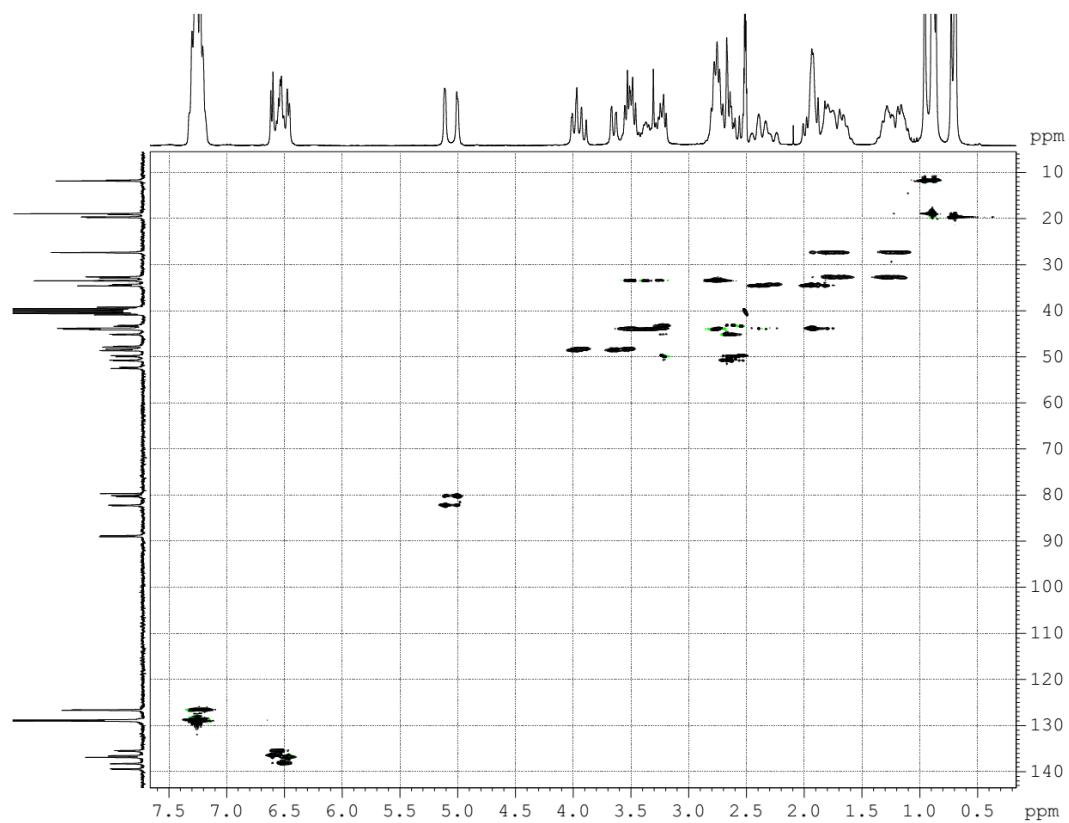

2D  $^1\text{H}$ ,  $^{13}\text{C}$ -HSQC-COSY (DMSO- $d_6$ , 300.1 & 75.5 MHz)

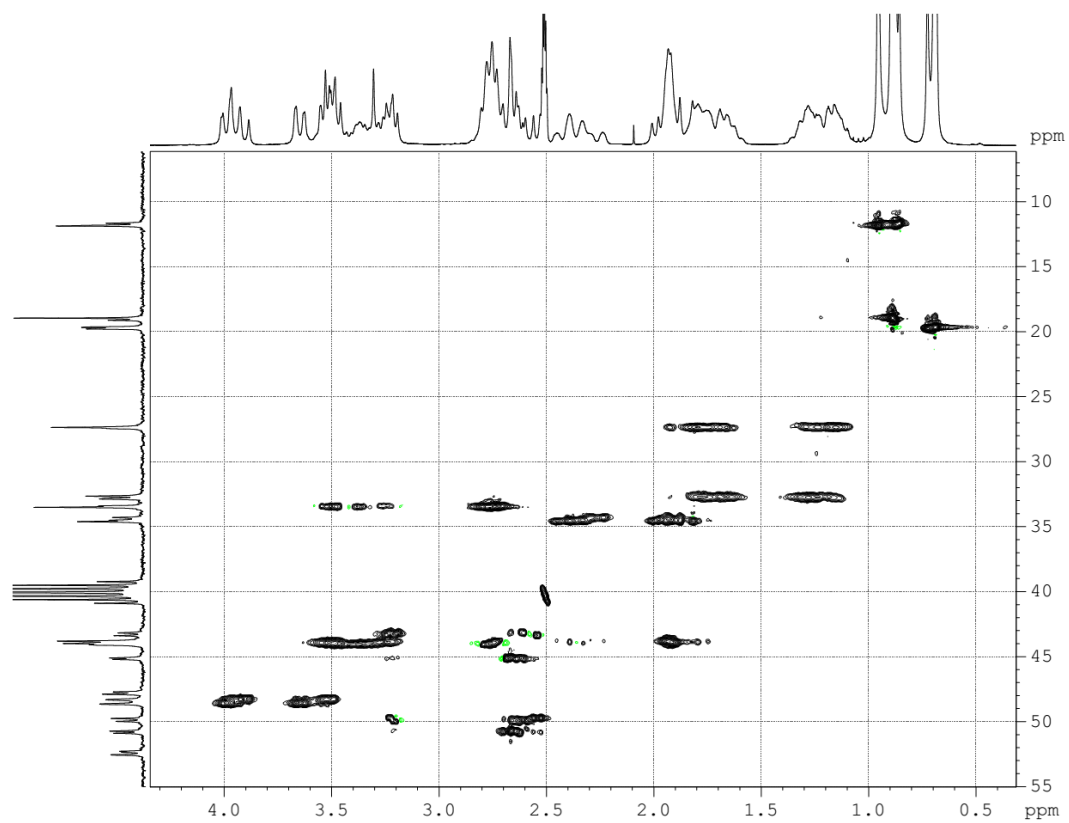

2D  $^1\text{H}$ ,  $^{15}\text{N}$ -HSQC (DMSO- $d_6$ , 300.1 & 30.4 MHz)

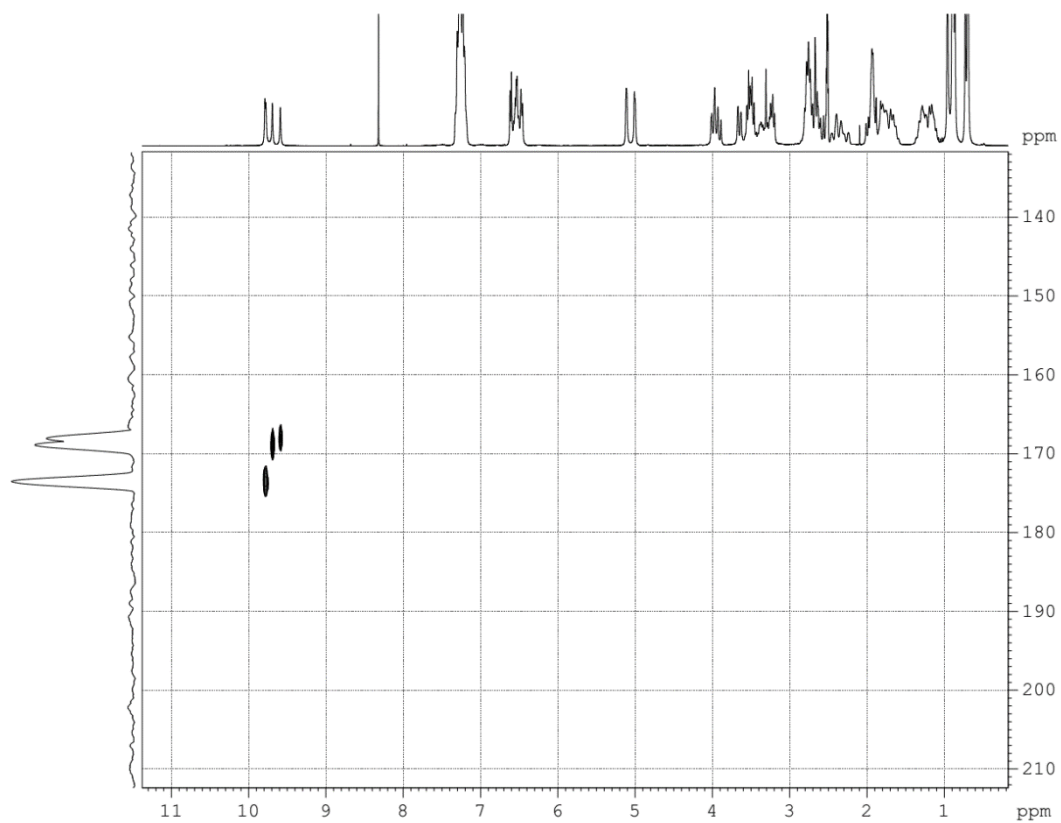

2D  $^1\text{H}$ ,  $^{15}\text{N}$ -HSQC (DMSO- $d_6$ , 300.1 & 30.4 MHz)

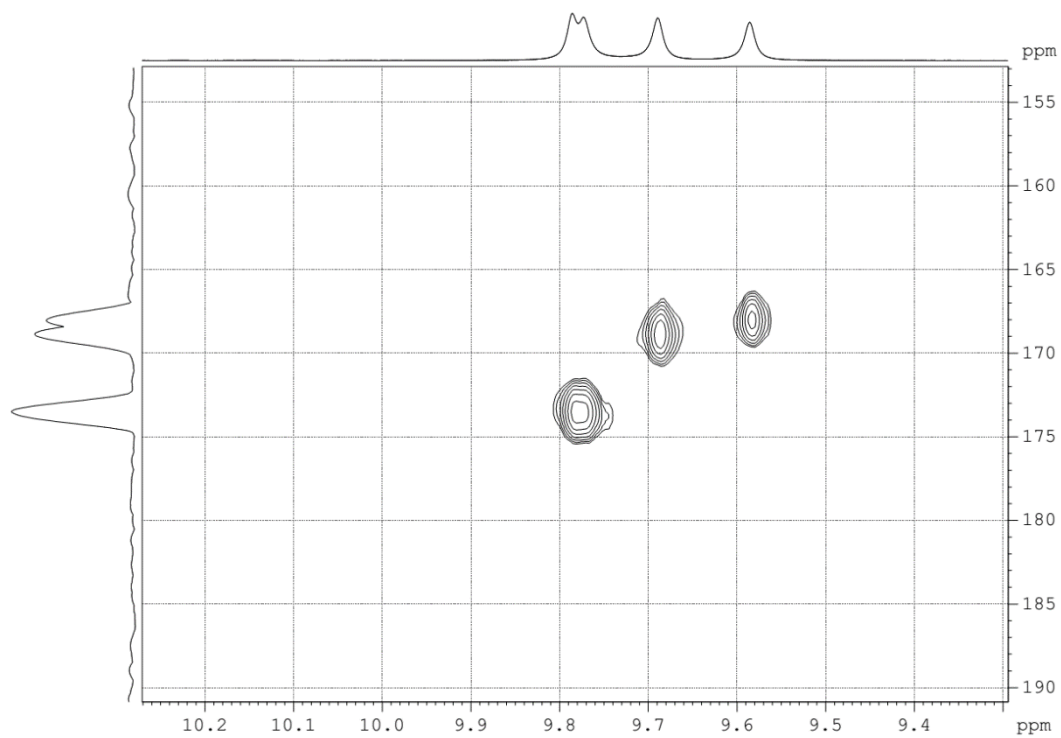



2D  $^1\text{H}, ^{15}\text{N}$ -HMBC (DMSO- $d_6$ , 300.1 & 30.4 MHz)

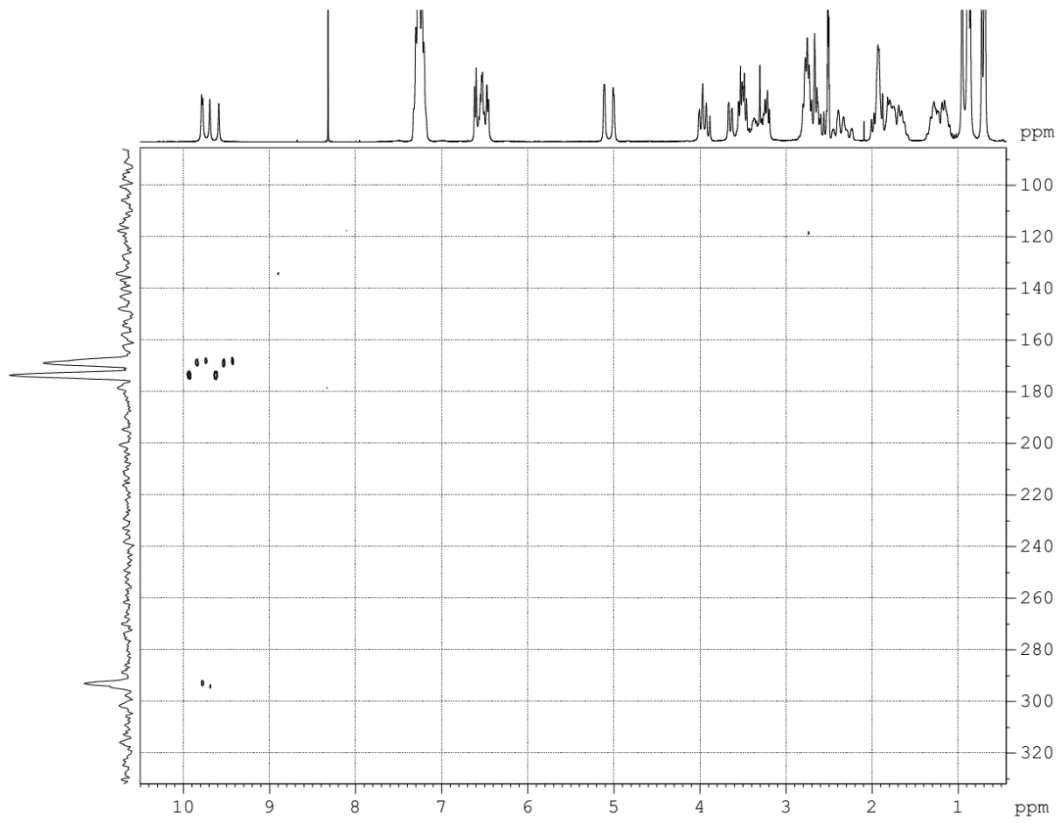

## Dynamic NMR study for compound 16.

$^1\text{H}$  NMR spectra were recorded on a 300 MHz spectrometer. Dynamic experiments were carried out in DMSO- $d_6$  solutions as a direct monitoring in an NMR tube with recording of spectra at different temperatures in the interval 30–110 °C with 10 °C step.

### $^1\text{H}$ NMR (DMSO- $d_6$ , 300.1 MHz), +30 °C for comp 16

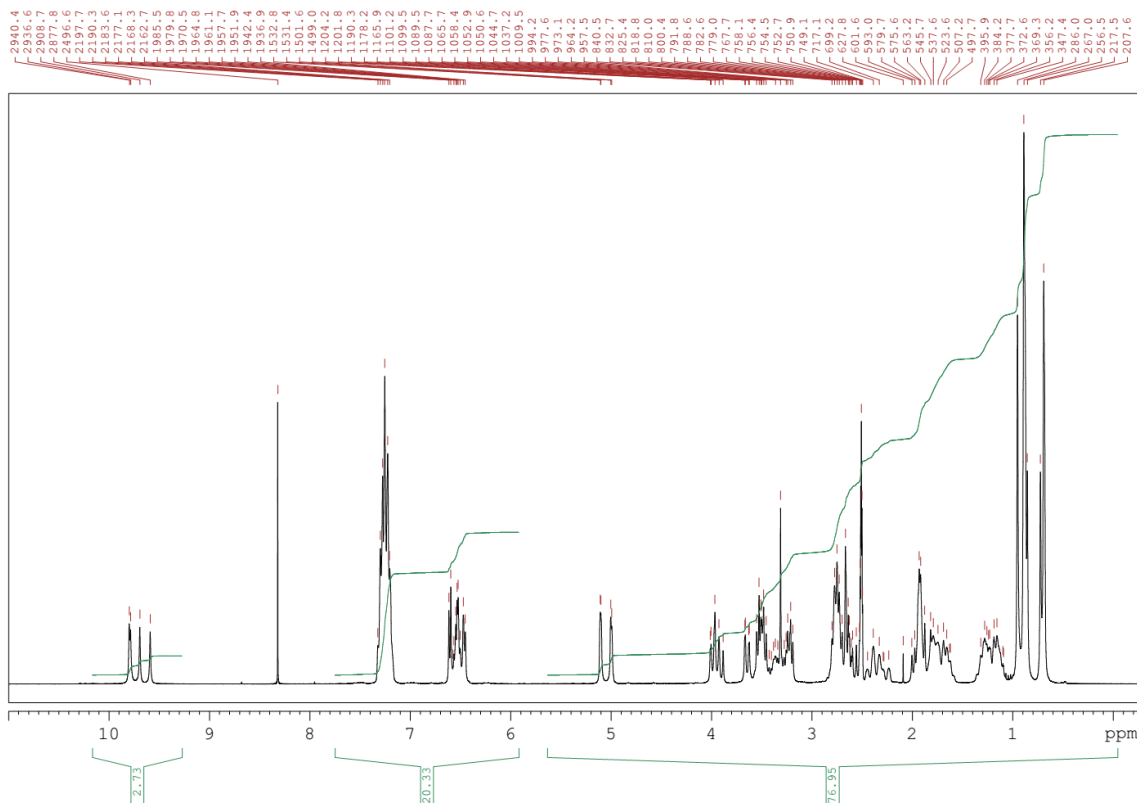

### $^1\text{H}$ NMR (DMSO- $d_6$ , 300.1 MHz), +40 °C

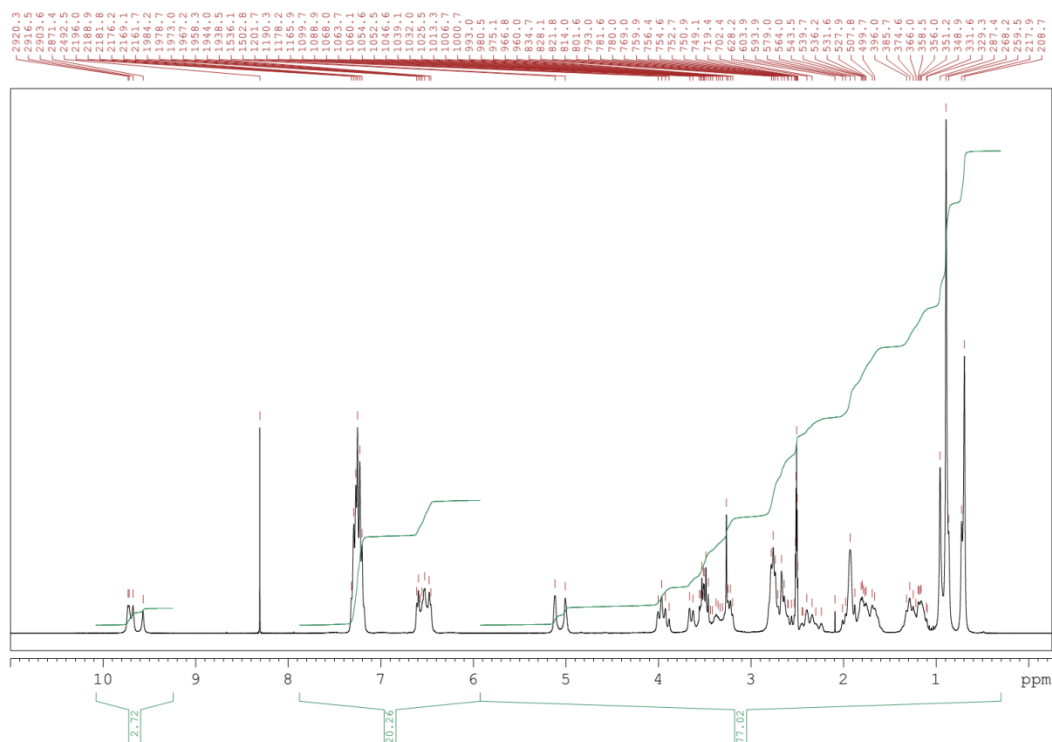

**<sup>1</sup>H NMR (DMSO-d<sub>6</sub>, 300.1 MHz), +50 °C**

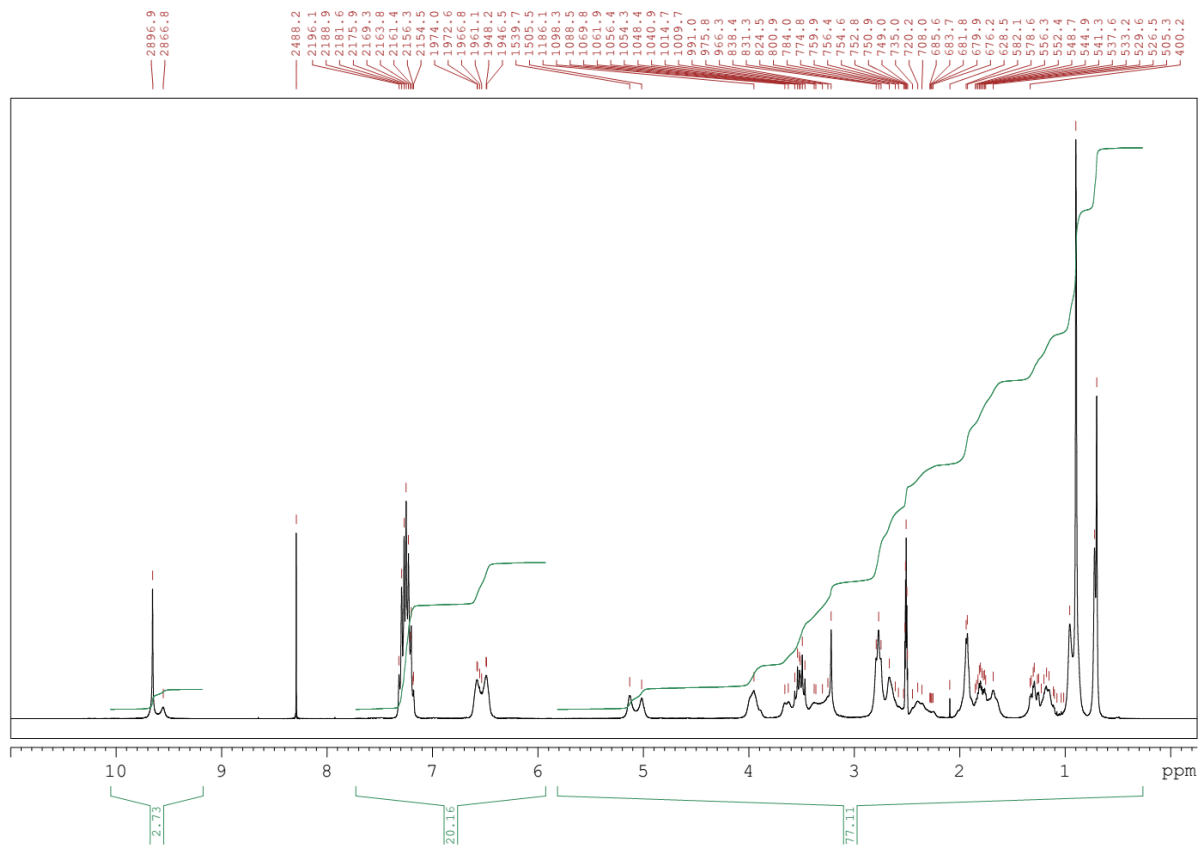

**<sup>1</sup>H NMR (DMSO-d<sub>6</sub>, 300.1 MHz), +60 °C**

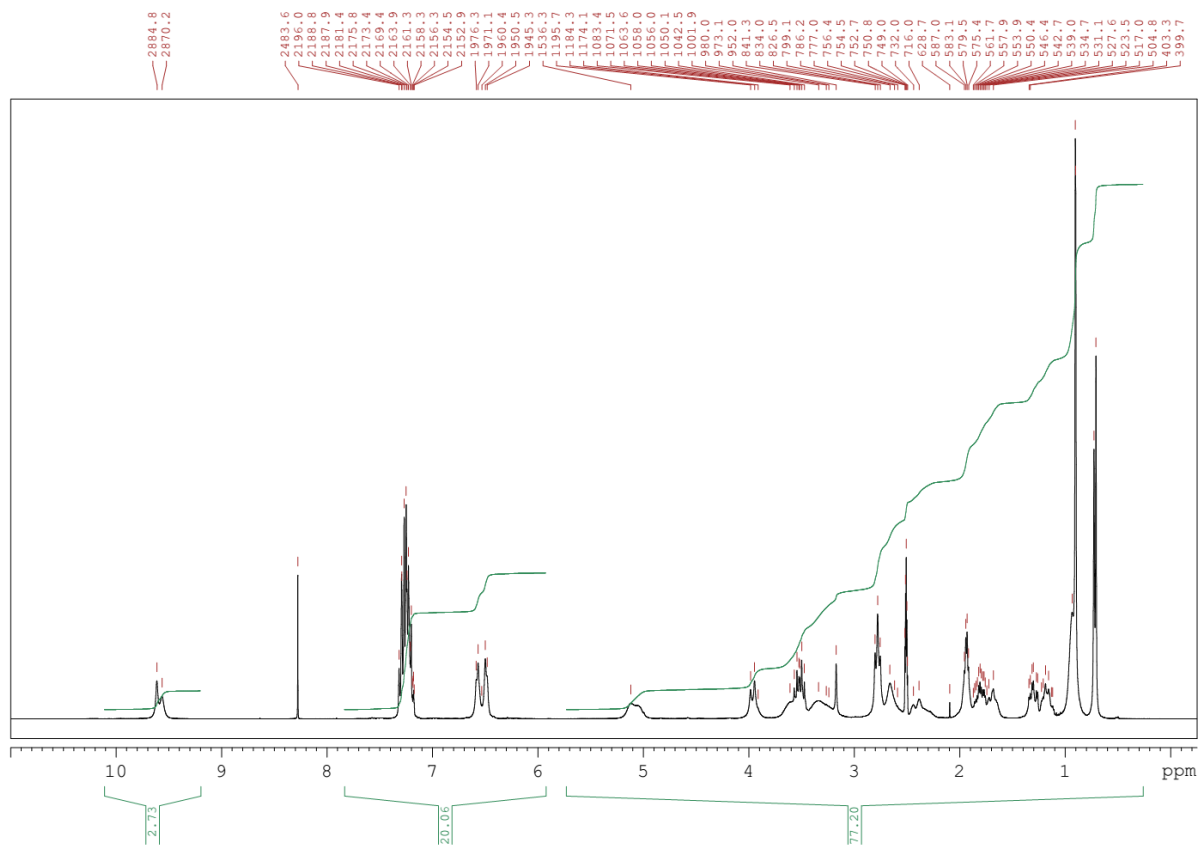

<sup>1</sup>H NMR (DMSO-d<sub>6</sub>, 300.1 MHz), +70 °C

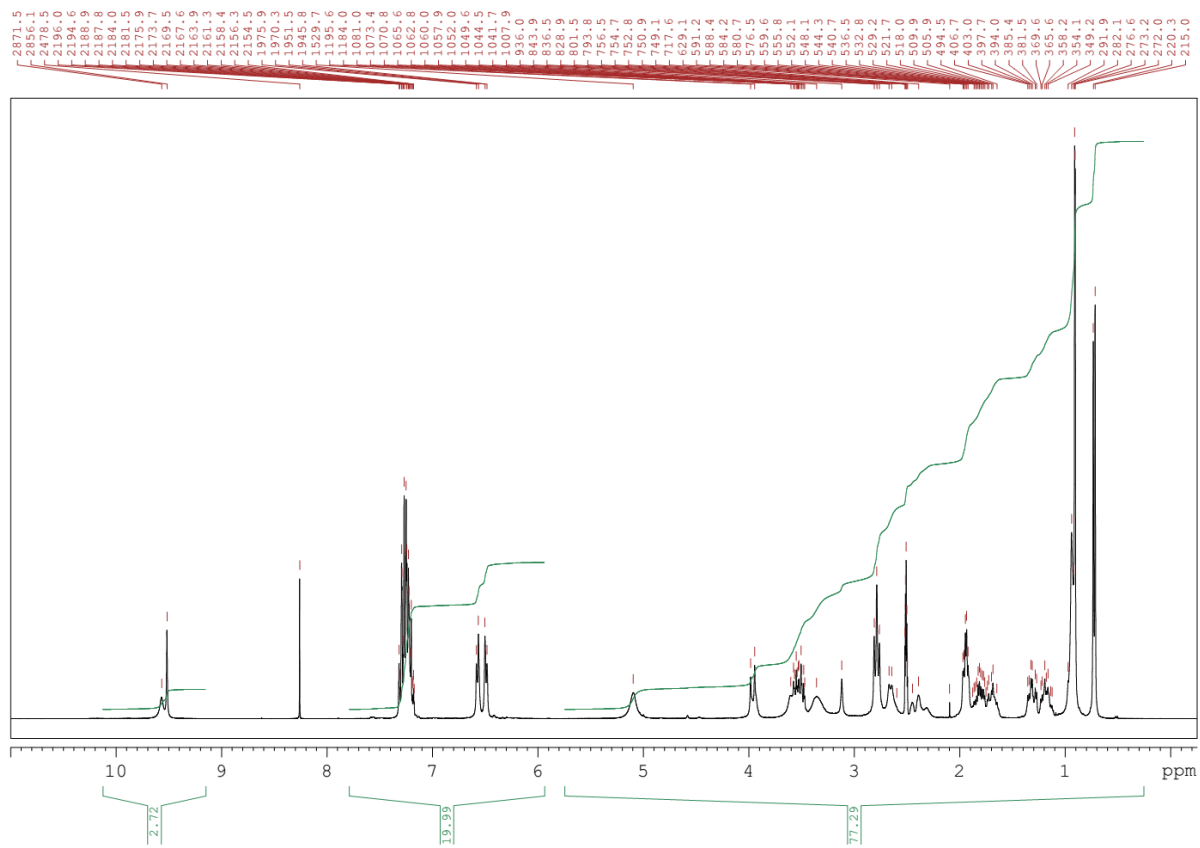

<sup>1</sup>H NMR (DMSO-d<sub>6</sub>, 300.1 MHz), +80 °C

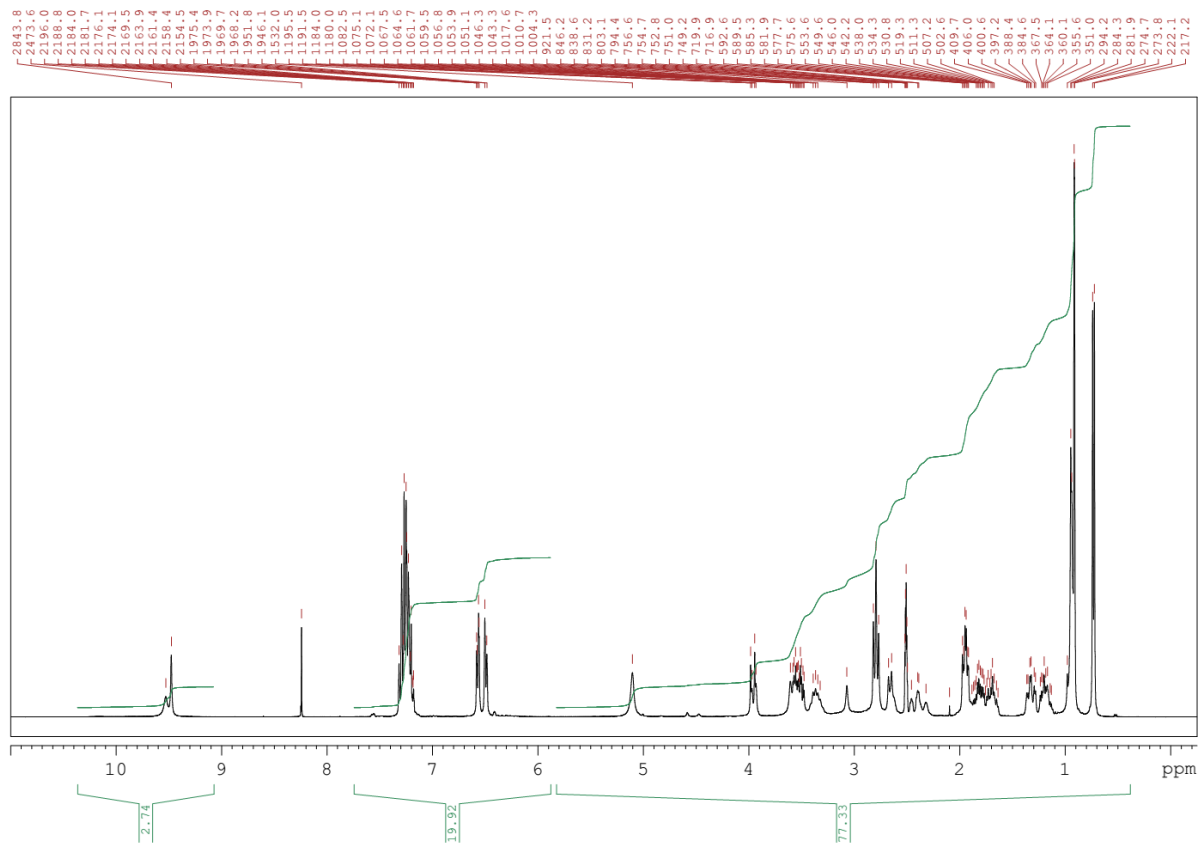

<sup>1</sup>H NMR (DMSO-d<sub>6</sub>, 300.1 MHz), +90 °C

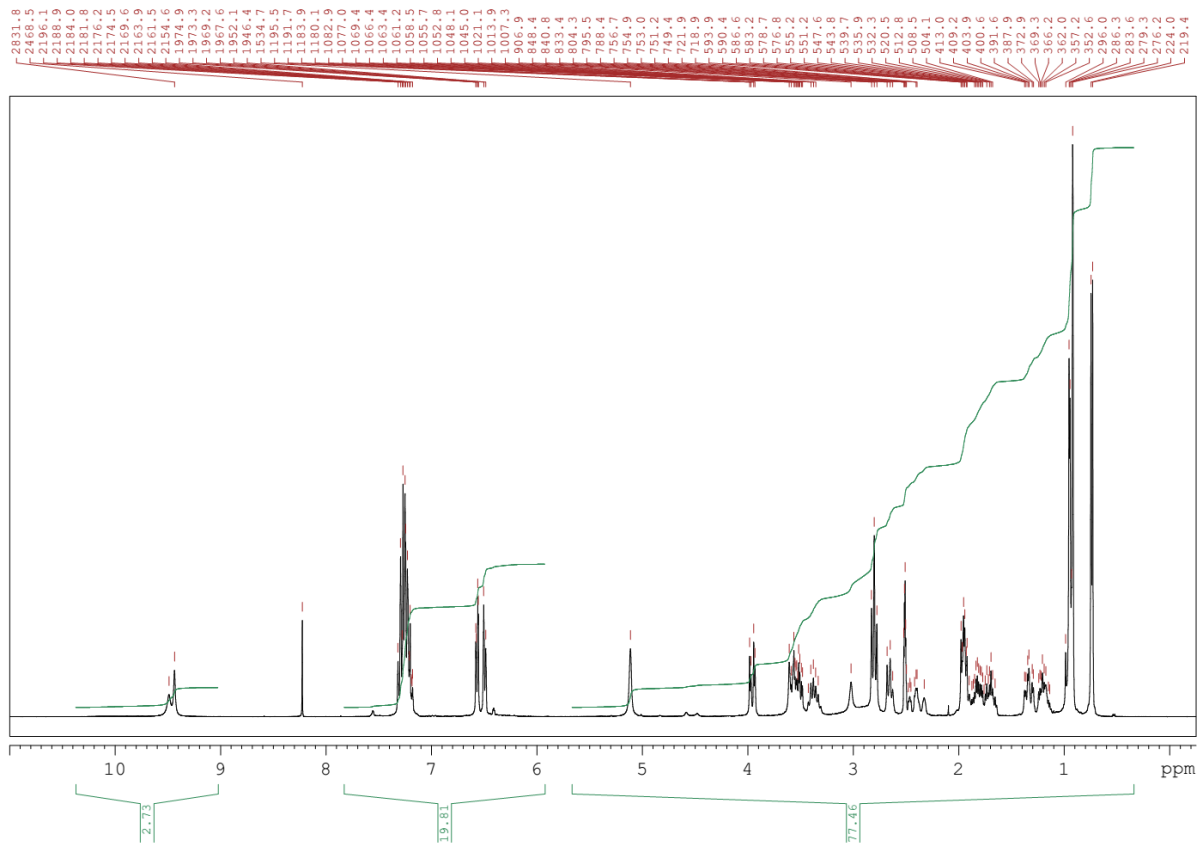

<sup>1</sup>H NMR (DMSO-d<sub>6</sub>, 300.1 MHz), +100 °C

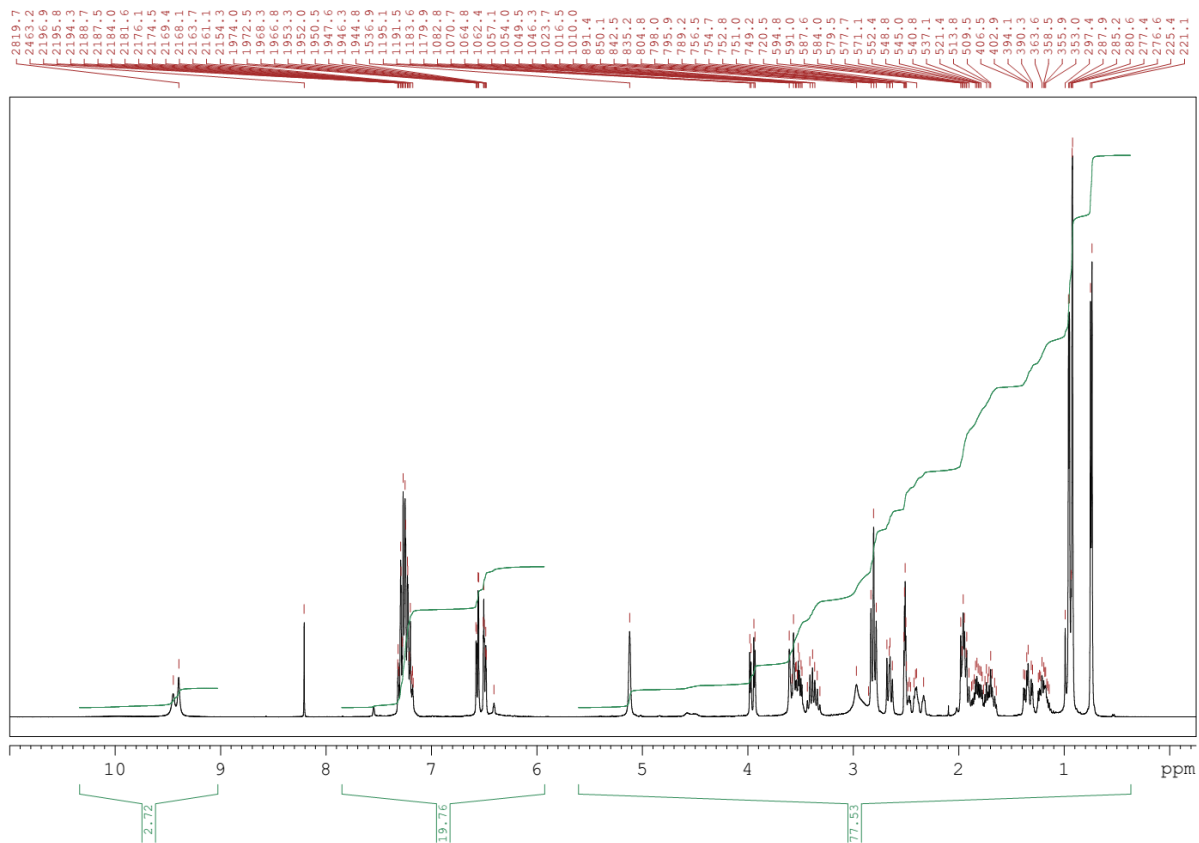

$^1\text{H}$  NMR (DMSO- $d_6$ , 300.1 MHz), +110 °C

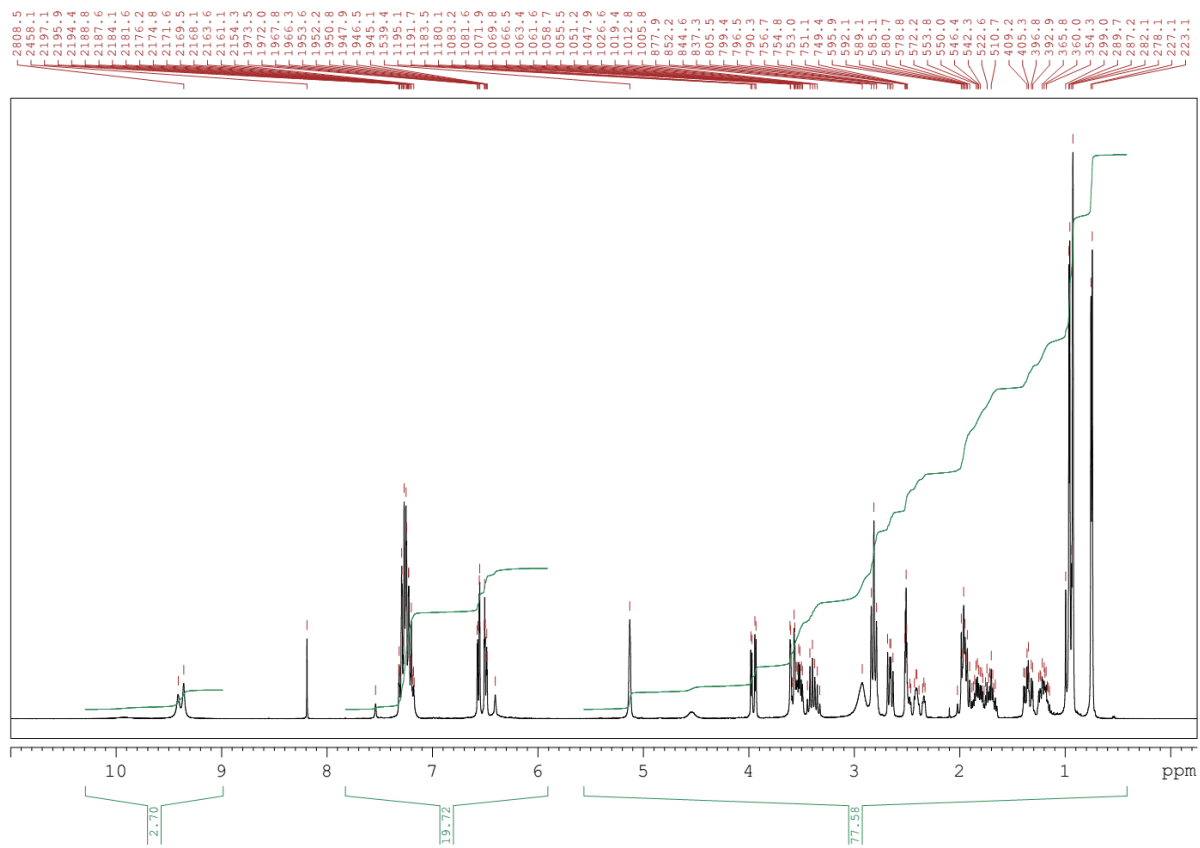

$^1\text{H}$  NMR (DMSO- $d_6$ , 300.1 MHz), different temp. {30 – 40 – 50 – 60 – 70 – 80 – 90 – 100 – 110 °C}

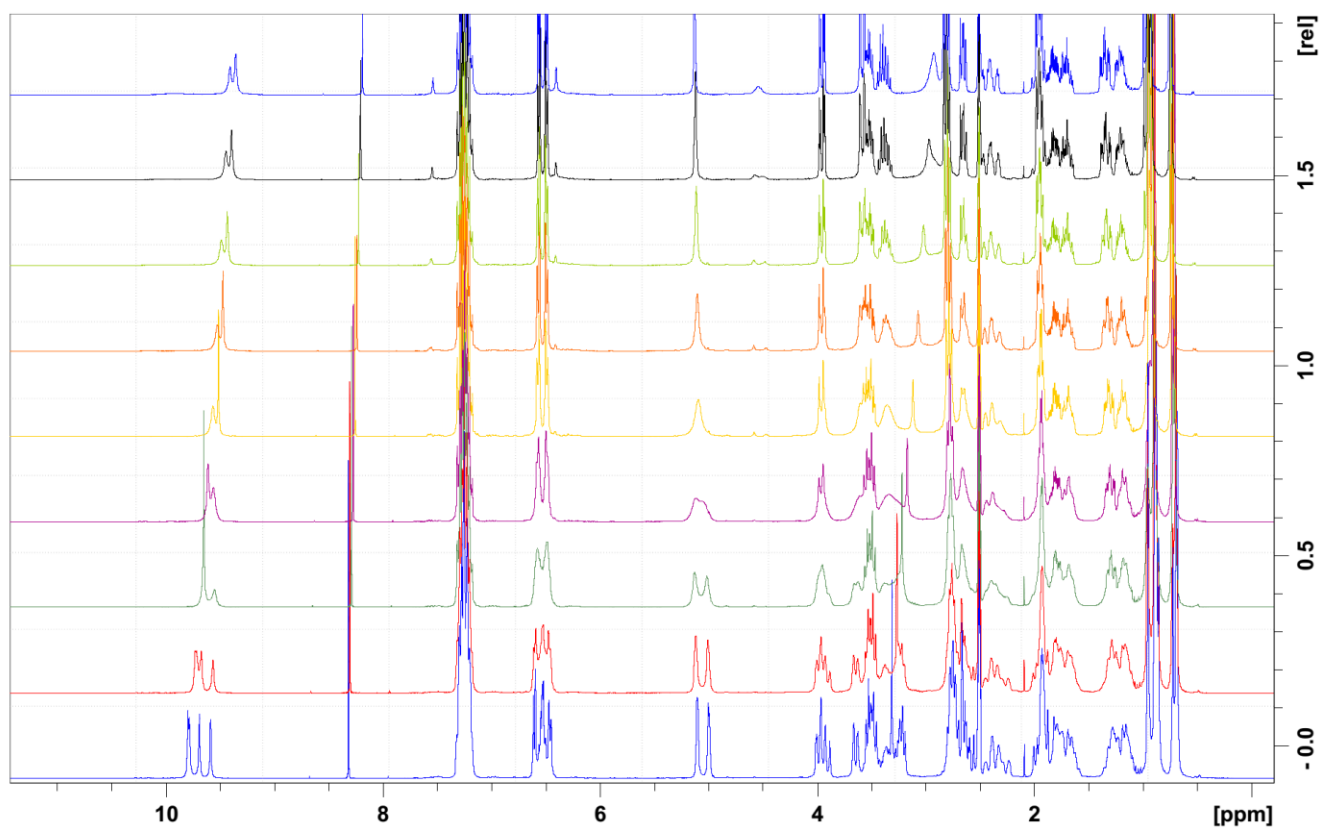

$^1\text{H}$  NMR (DMSO- $d_6$ , 300.1 MHz), different temp. {30 – 40 – 50 – 60 – 70 – 80 – 90 – 100 – 110 °C}

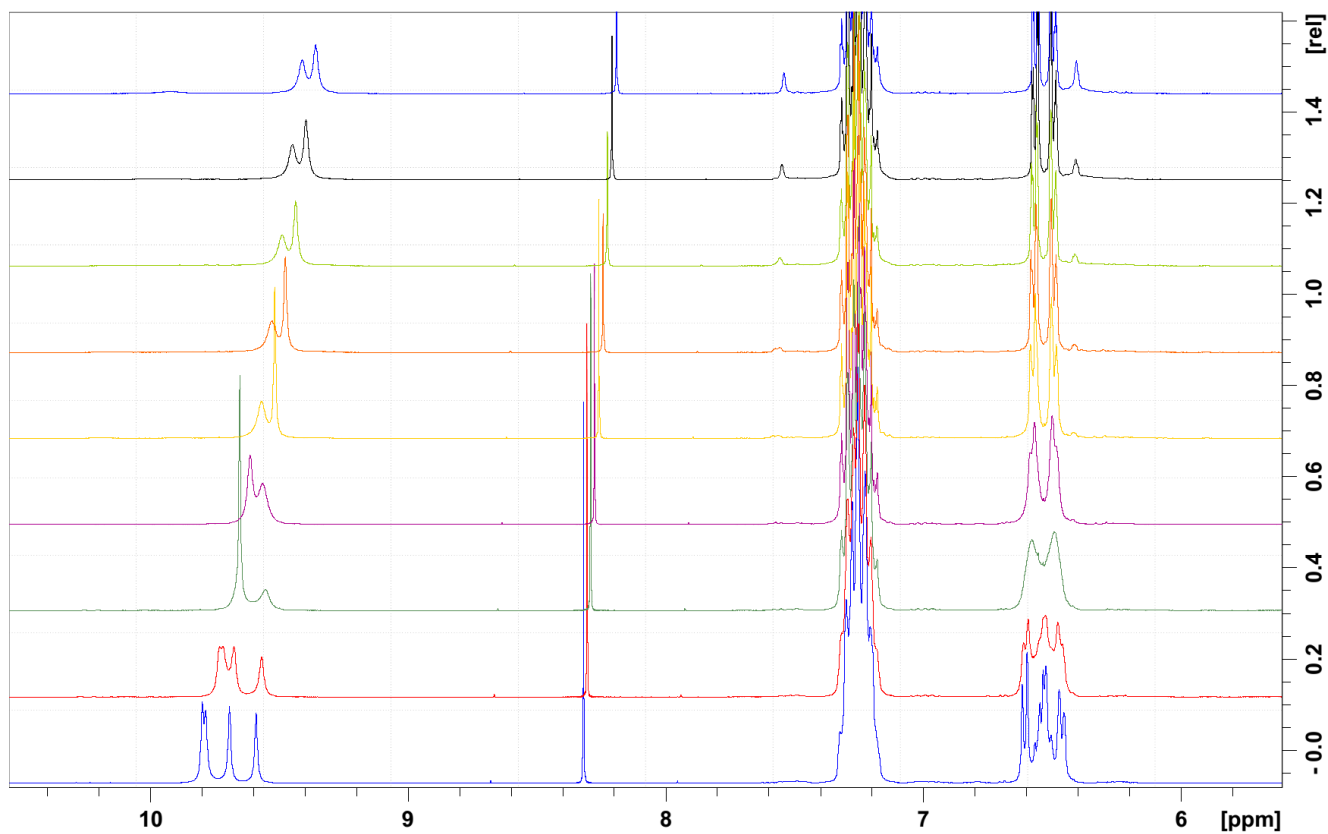

$^1\text{H}$  NMR (DMSO- $d_6$ , 300.1 MHz), different temp. {30 – 40 – 50 – 60 – 70 – 80 – 90 – 100 – 110 °C}

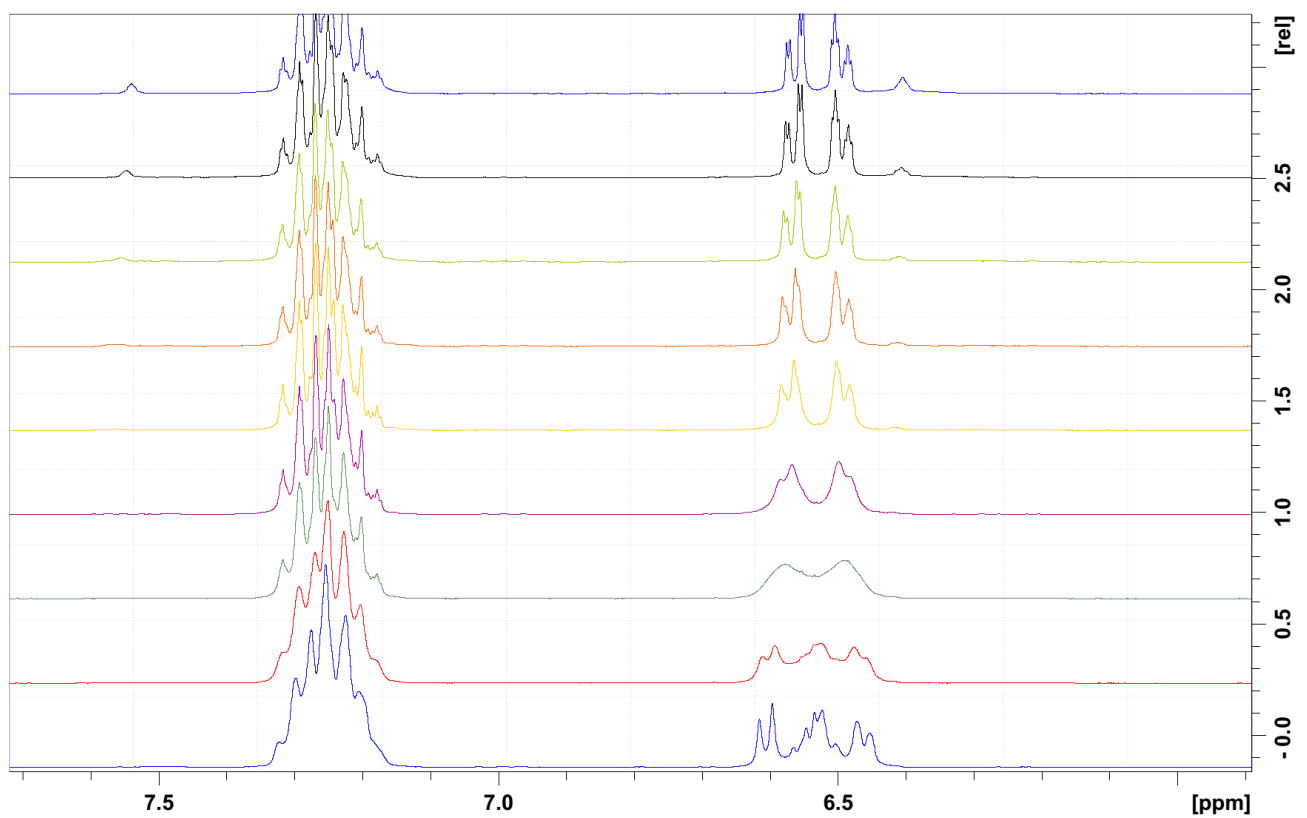

$^1\text{H}$  NMR (DMSO- $d_6$ , 300.1 MHz), different temp. {30 – 40 – 50 – 60 – 70 – 80 – 90 – 100 – 110 °C}

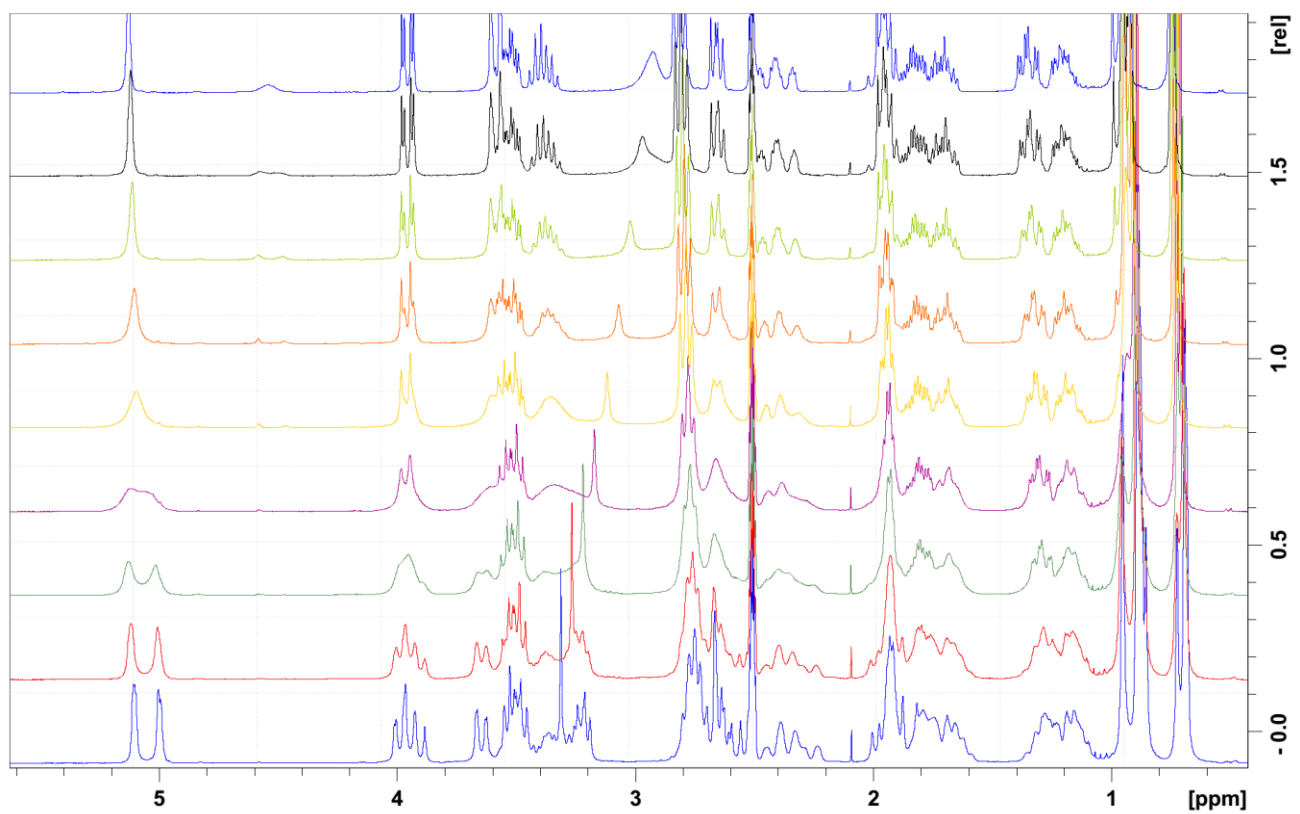



2.12. A mixture of (5aS,6R,7S,9aR)-5-oxo-N'-[(1R,2E,4R)-1,7,7-trimethylbicyclo[2.2.1]hept-2-ylidene]-2,3,5,5a,6,7-hexahydro-7,9a-epoxy[1,3]thiazolo[2,3-a]isoindole-6-carbohydrazide (A) and (5aR,6S,7R,9aS)-5-oxo-N'-[(1R,2E,4R)-1,7,7-trimethylbicyclo[2.2.1]hept-2-ylidene]-2,3,5,5a,6,7-hexahydro-7,9a-epoxy[1,3]thiazolo[2,3-a]isoindole-6-carbohydrazide (B) **17** (DMSO-*d*<sub>6</sub>, 400.0 MHz)

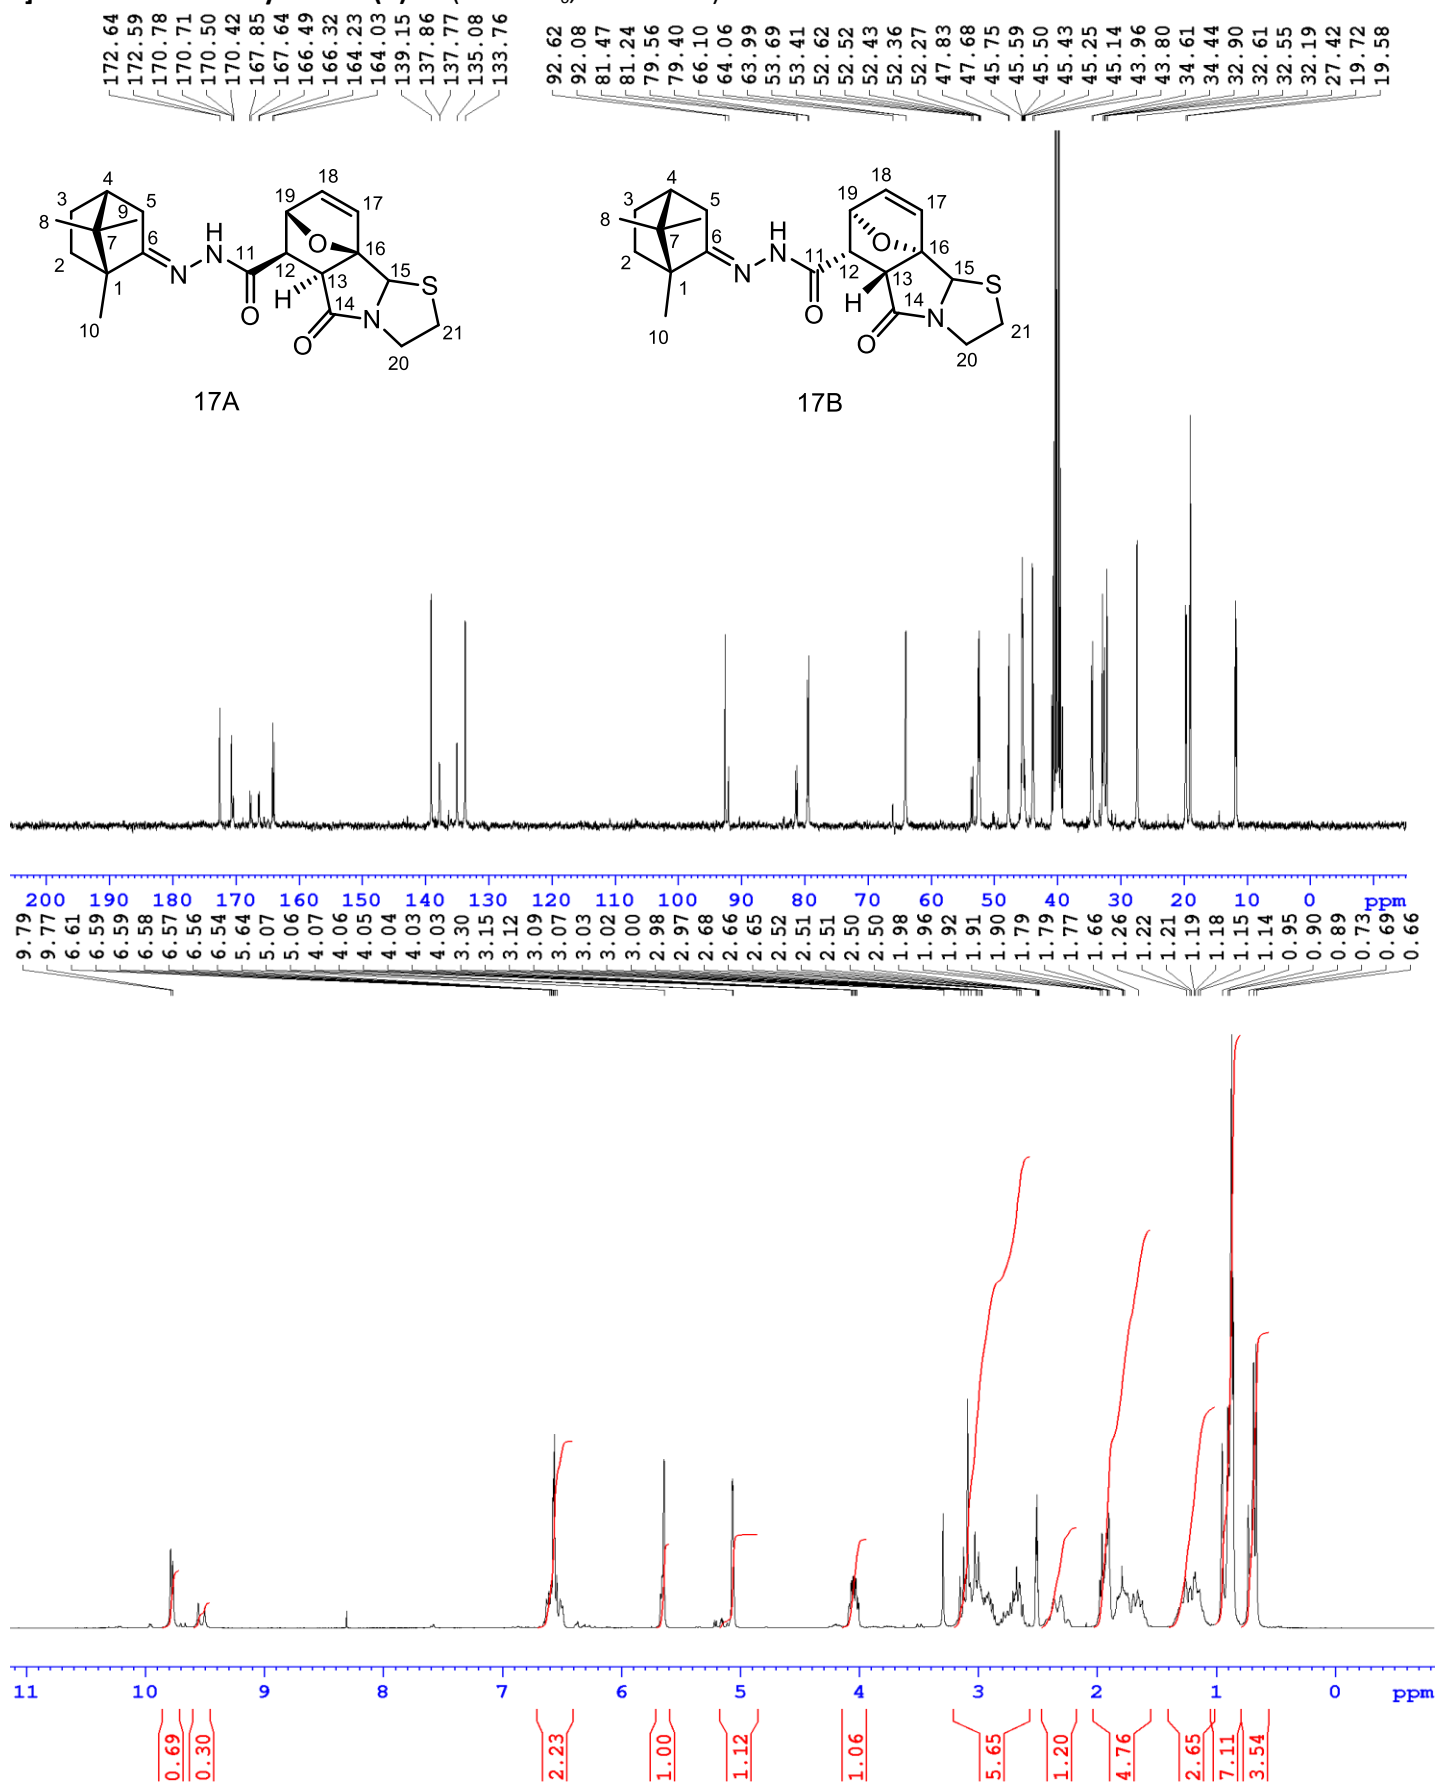

<sup>1</sup>H NMR (DMSO-d<sub>6</sub>, 300.1 MHz) for 17.

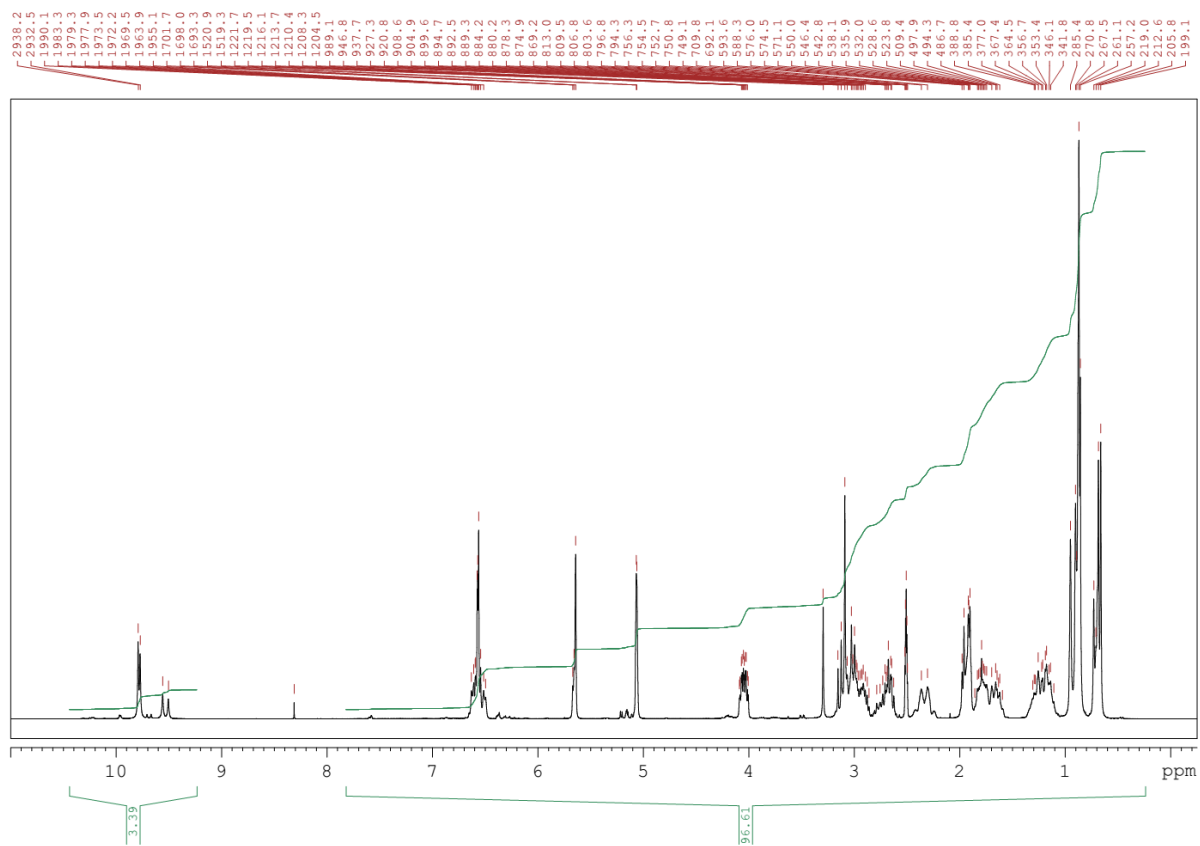

<sup>1</sup>H NMR (DMSO-d<sub>6</sub>, 300.1 MHz)

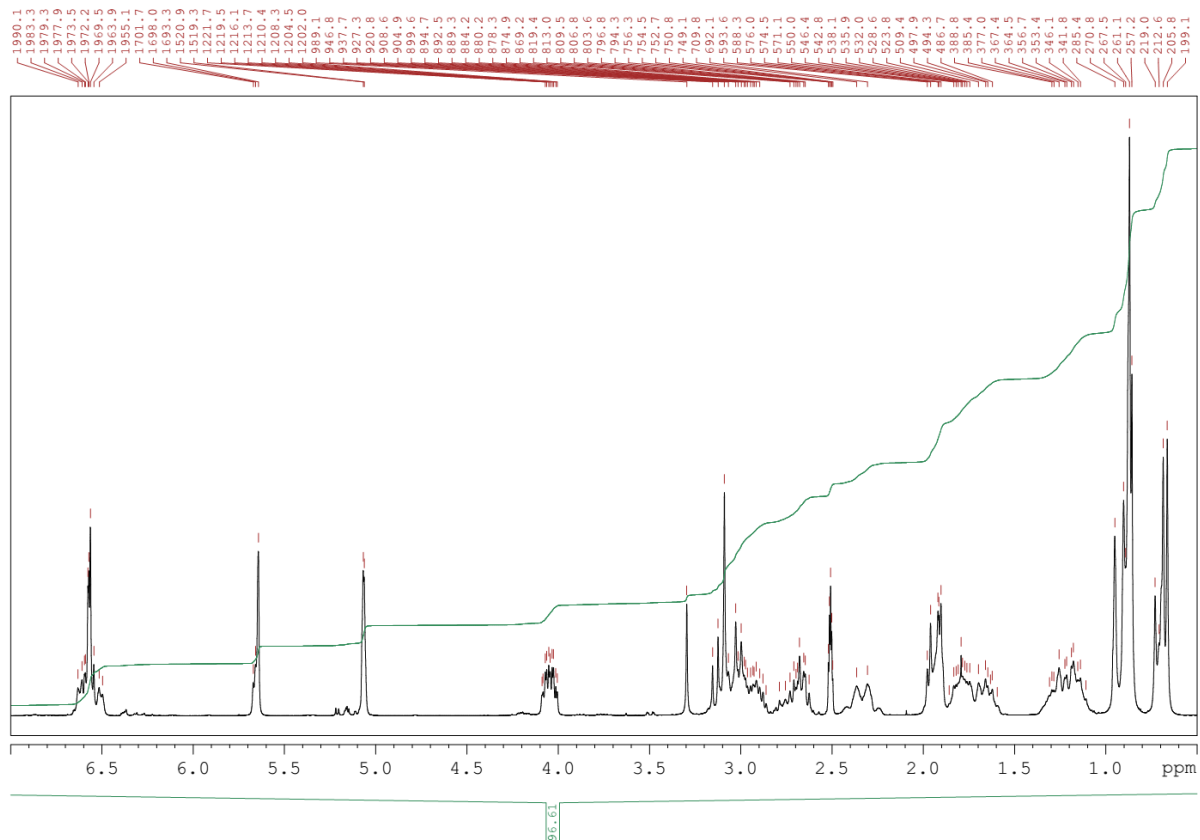

$^{13}\text{C}\{^1\text{H}\}$  NMR (DMSO- $d_6$ , 75.5 MHz)

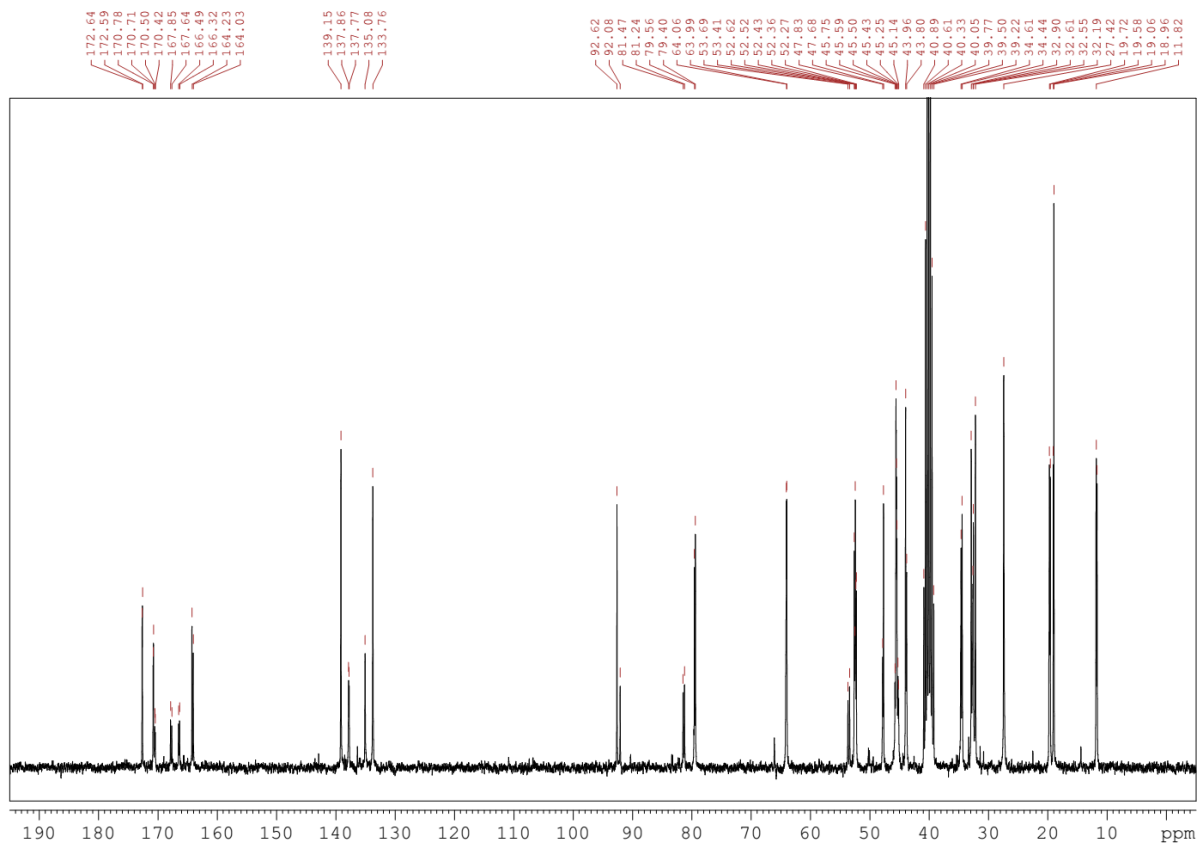

$^{13}\text{C}\{^1\text{H}\}$  NMR (DMSO- $d_6$ , 75.5 MHz)

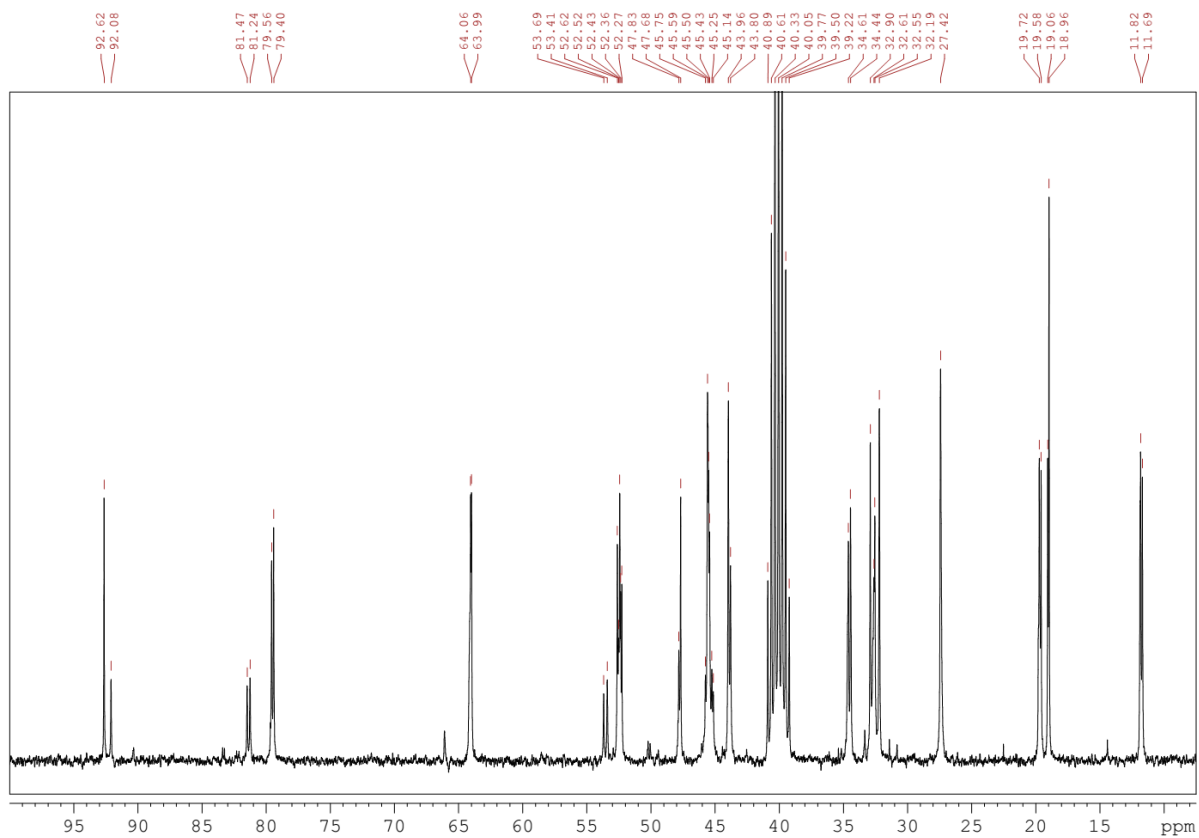

DEPT-135 NMR (DMSO-*d*<sub>6</sub>, 75.5 MHz)

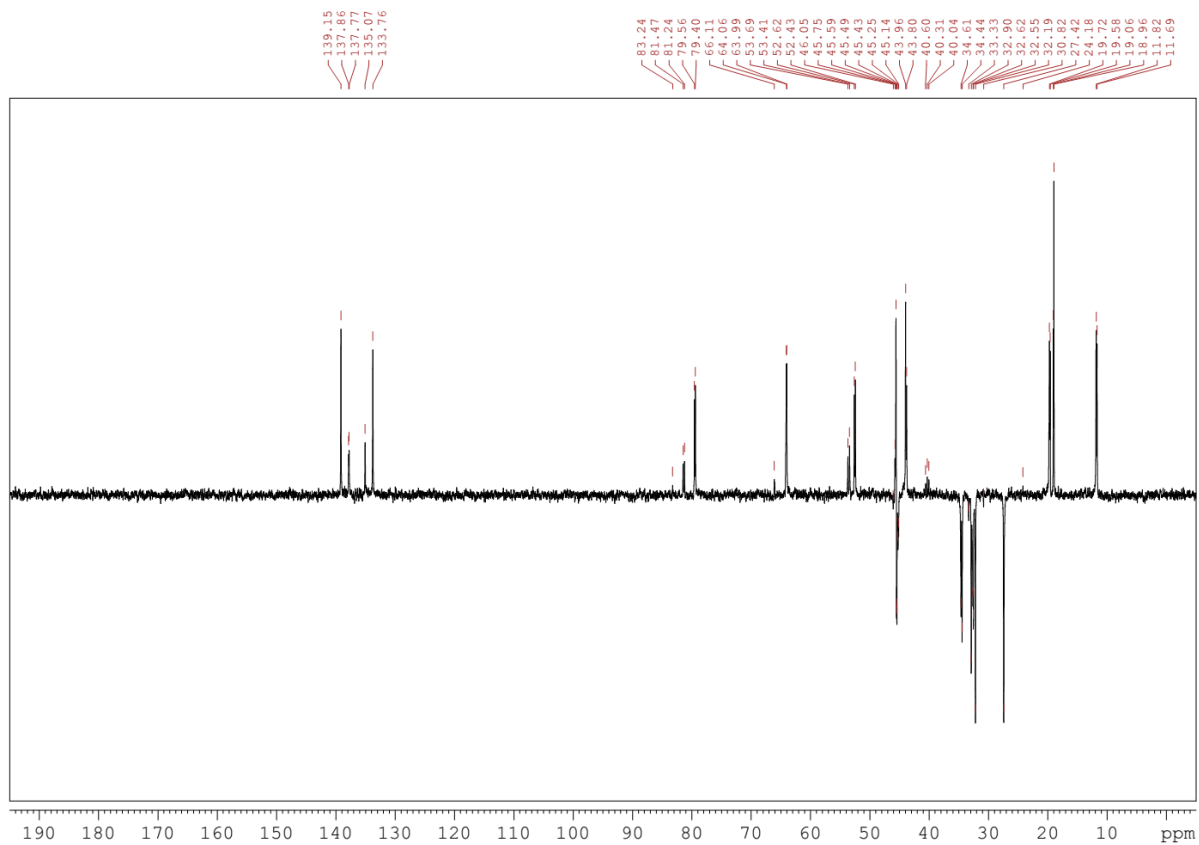

2D <sup>1</sup>H, <sup>1</sup>H-COSY (DMSO-*d*<sub>6</sub>, 300.1 MHz)

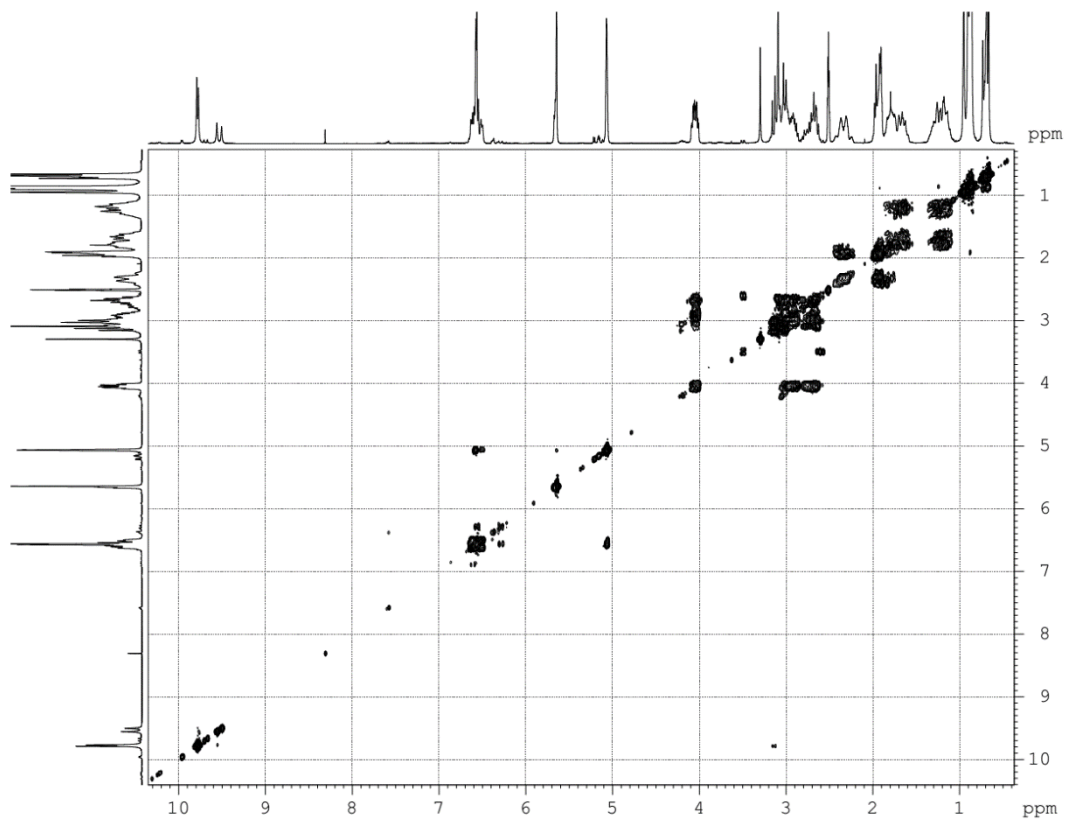

**2D  $^1\text{H}$ ,  $^1\text{H}$ -TOCSY (DMSO- $d_6$ , 300.1 MHz)**

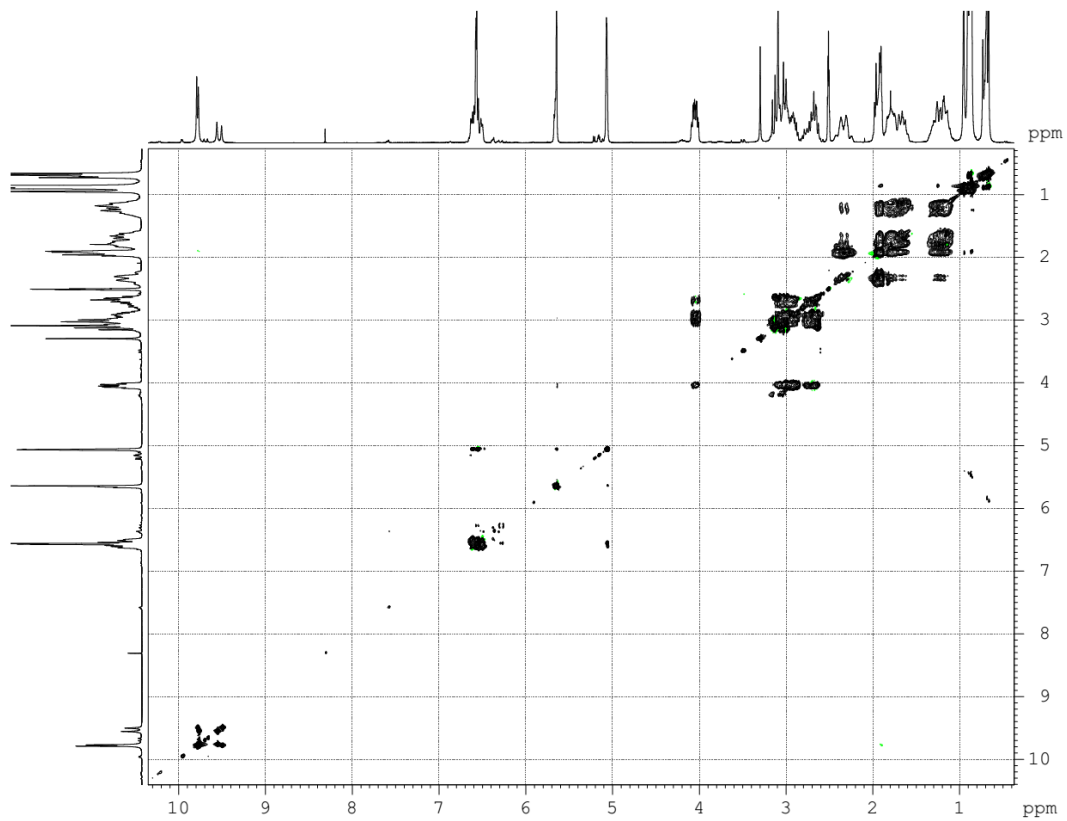

**2D  $^1\text{H}$ ,  $^1\text{H}$ -NOESY (DMSO- $d_6$ , 300.1 MHz)**

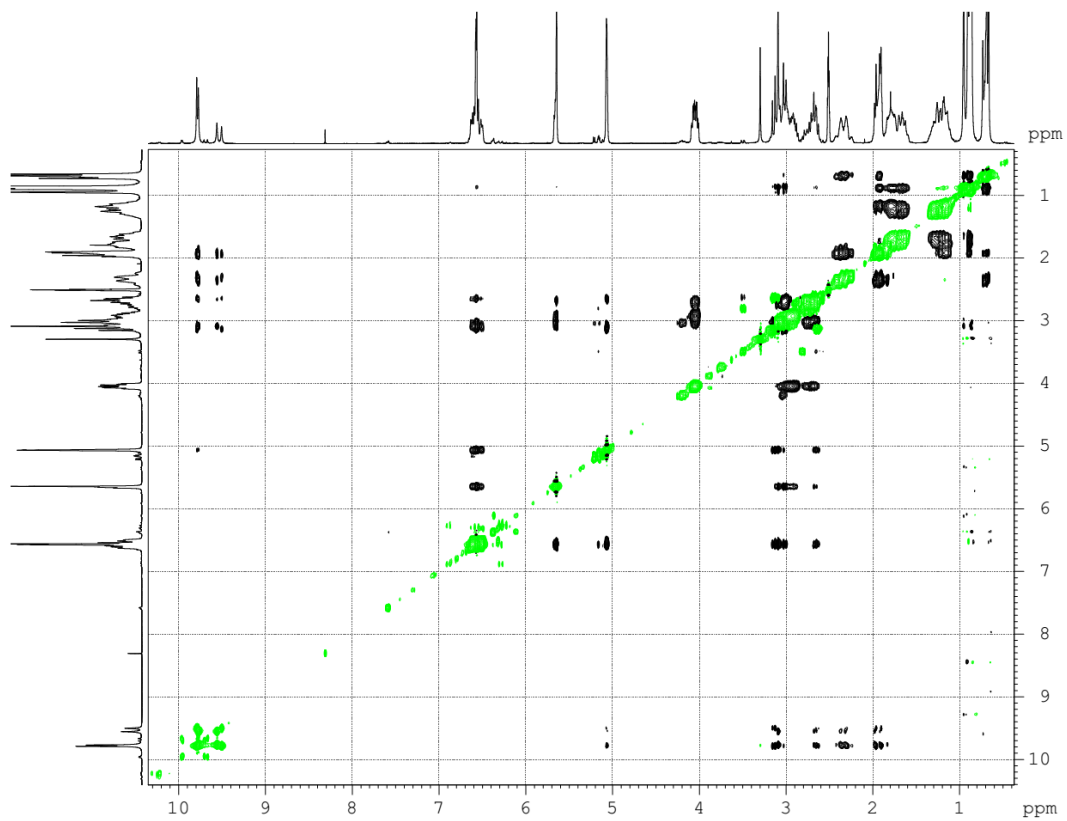

2D  $^1\text{H}$ ,  $^1\text{H}$ -NOESY (DMSO- $d_6$ , 300.1 MHz)

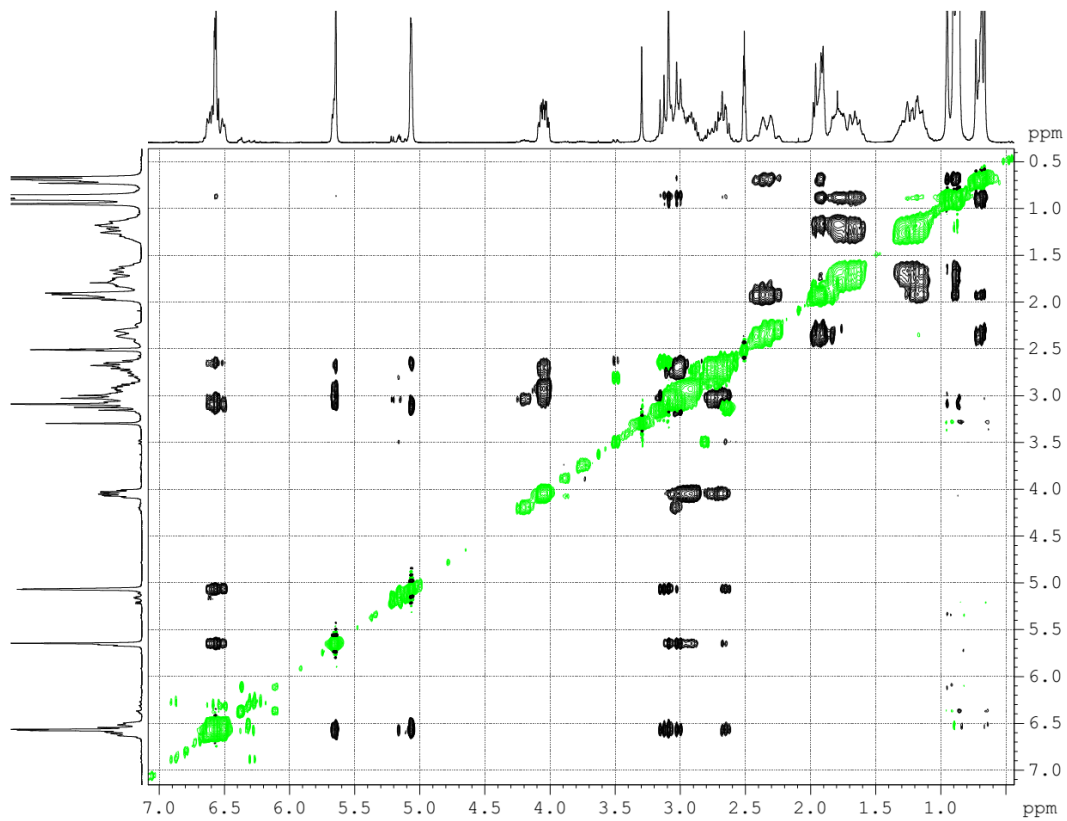

2D  $^1\text{H}$ ,  $^{13}\text{C}$ -edited-HSQC (DMSO- $d_6$ , 300.1 & 75.5 MHz)

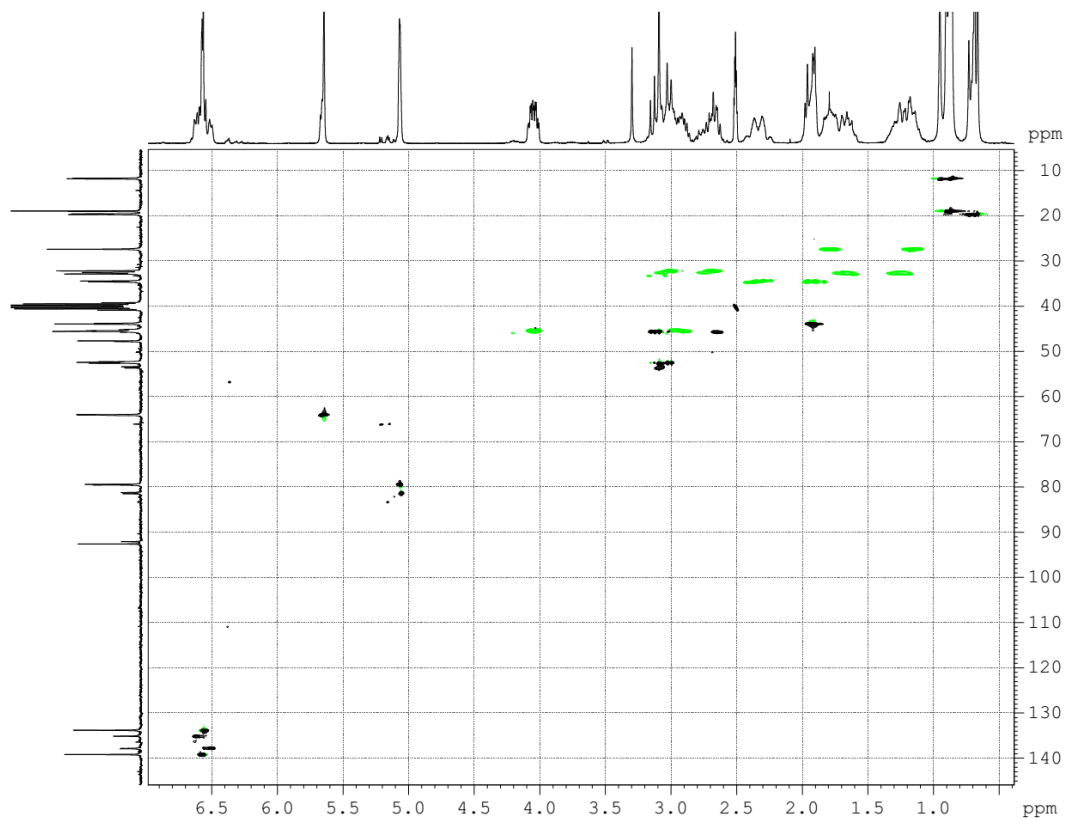

2D  $^1\text{H}$ ,  $^{13}\text{C}$ -edited-HSQC (DMSO- $d_6$ , 300.1 & 75.5 MHz)

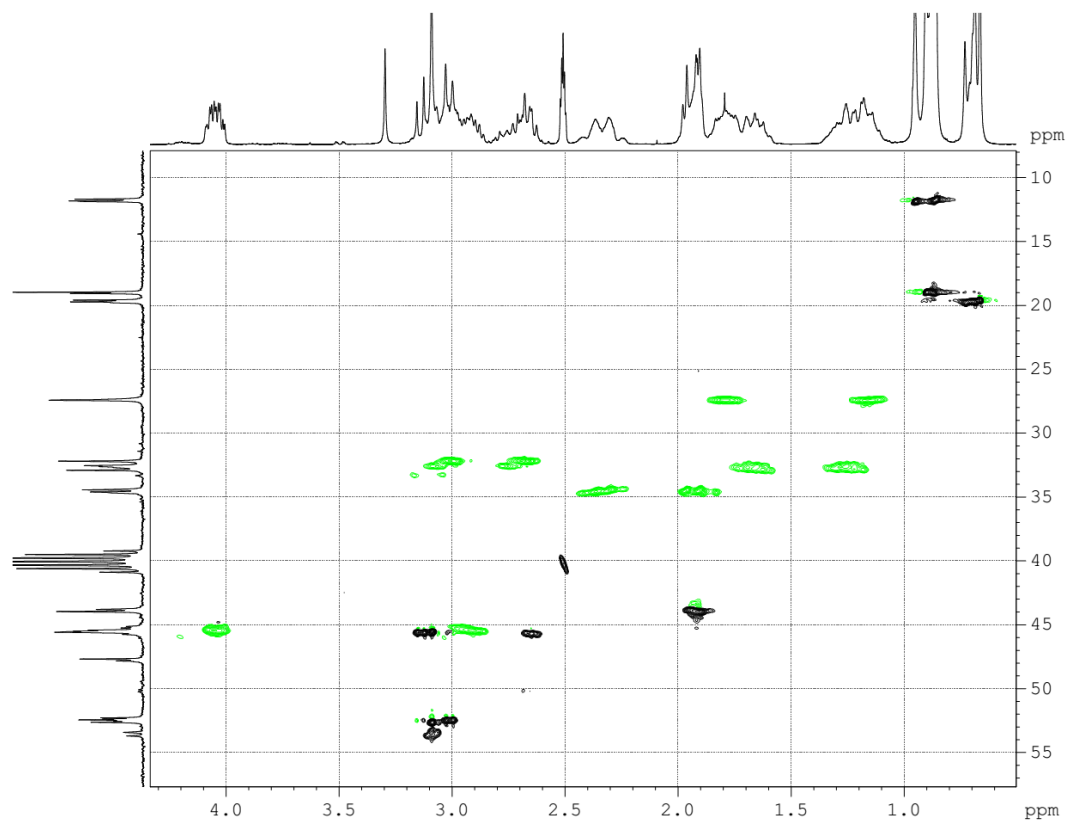

2D  $^1\text{H}$ ,  $^{13}\text{C}$ -HMBC (DMSO- $d_6$ , 300.1 & 75.5 MHz)

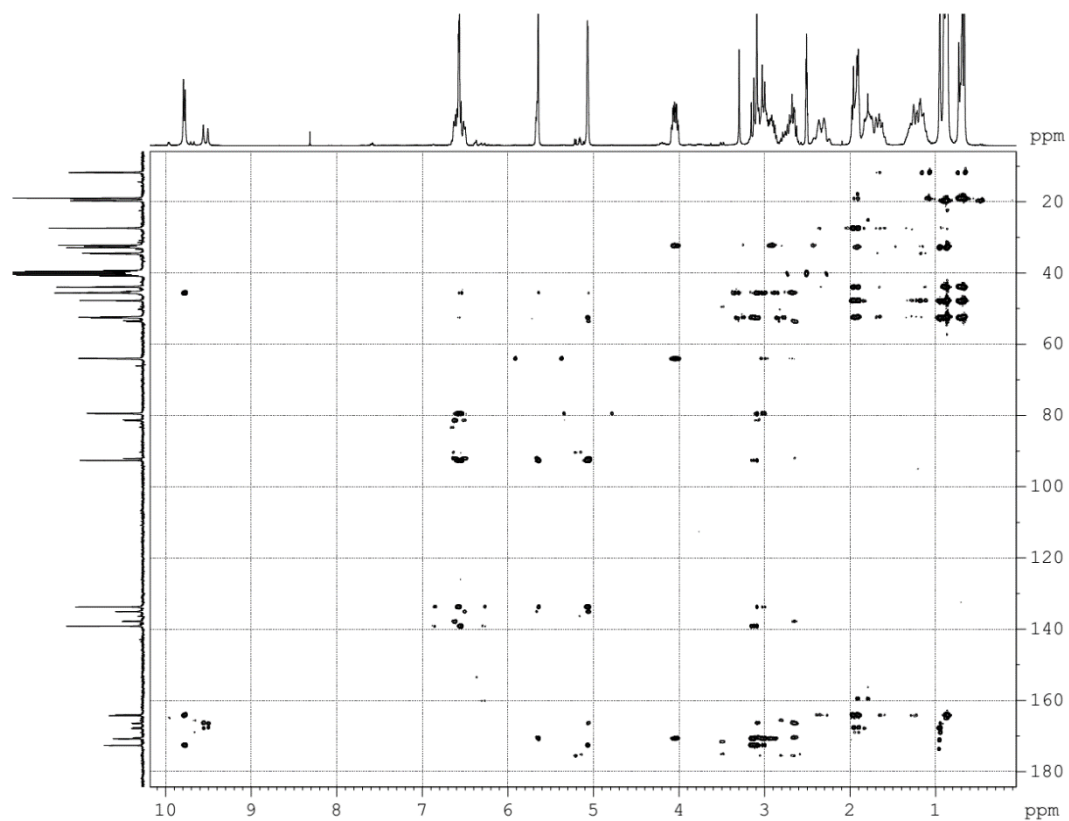

2D  $^1\text{H}$ ,  $^{13}\text{C}$ -HMBC (DMSO- $d_6$ , 300.1 & 75.5 MHz)

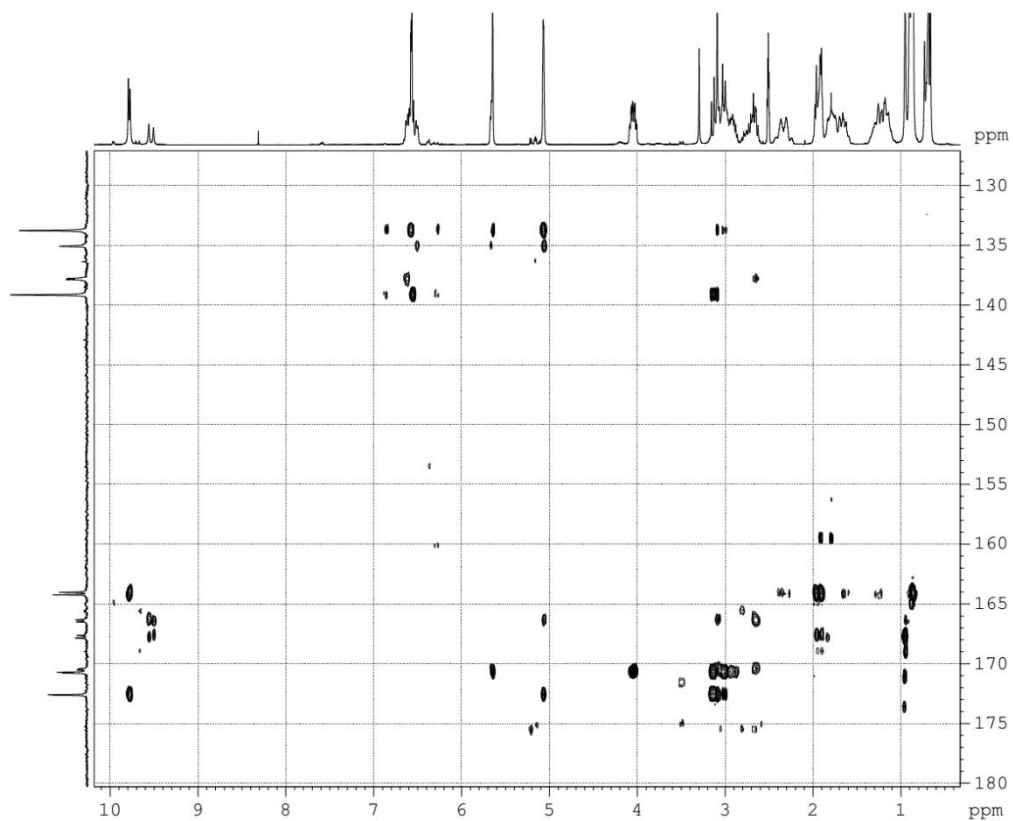

2D  $^1\text{H}$ ,  $^{13}\text{C}$ -HMBC (DMSO- $d_6$ , 300.1 & 75.5 MHz)

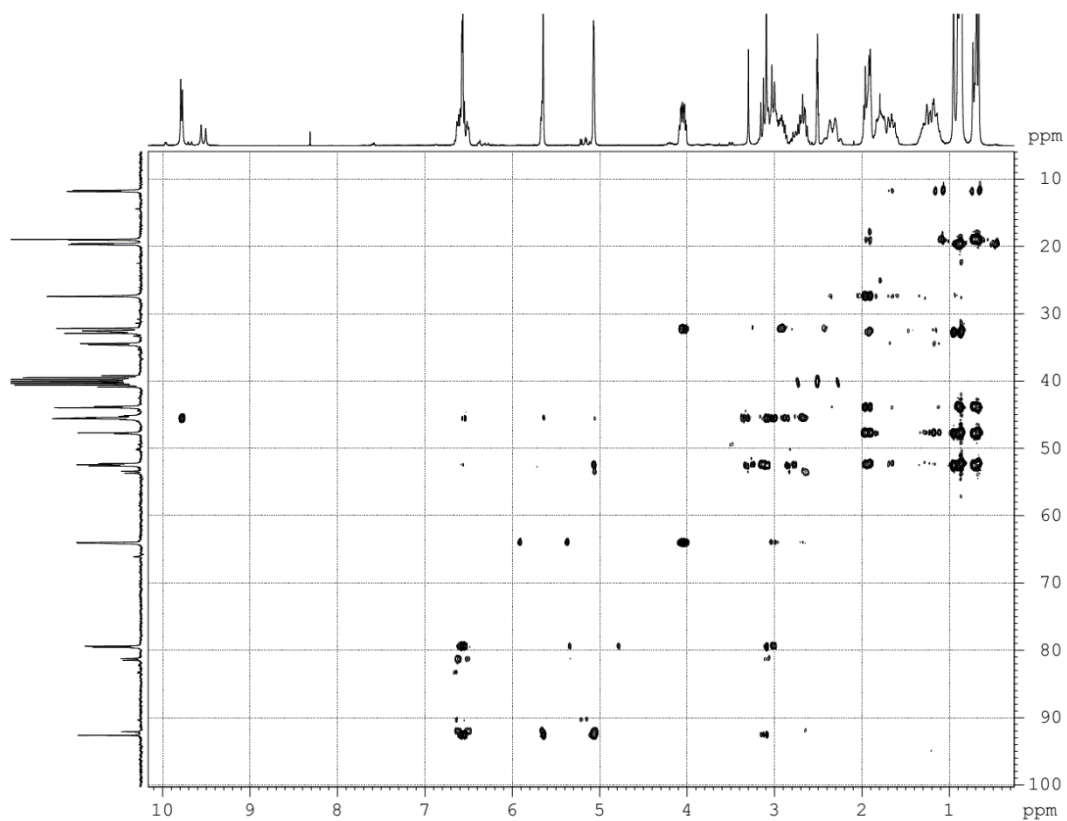



2D  $^1\text{H}$ ,  $^{13}\text{C}$ -HSQC-COSY (DMSO- $d_6$ , 300.1 & 75.5 MHz)

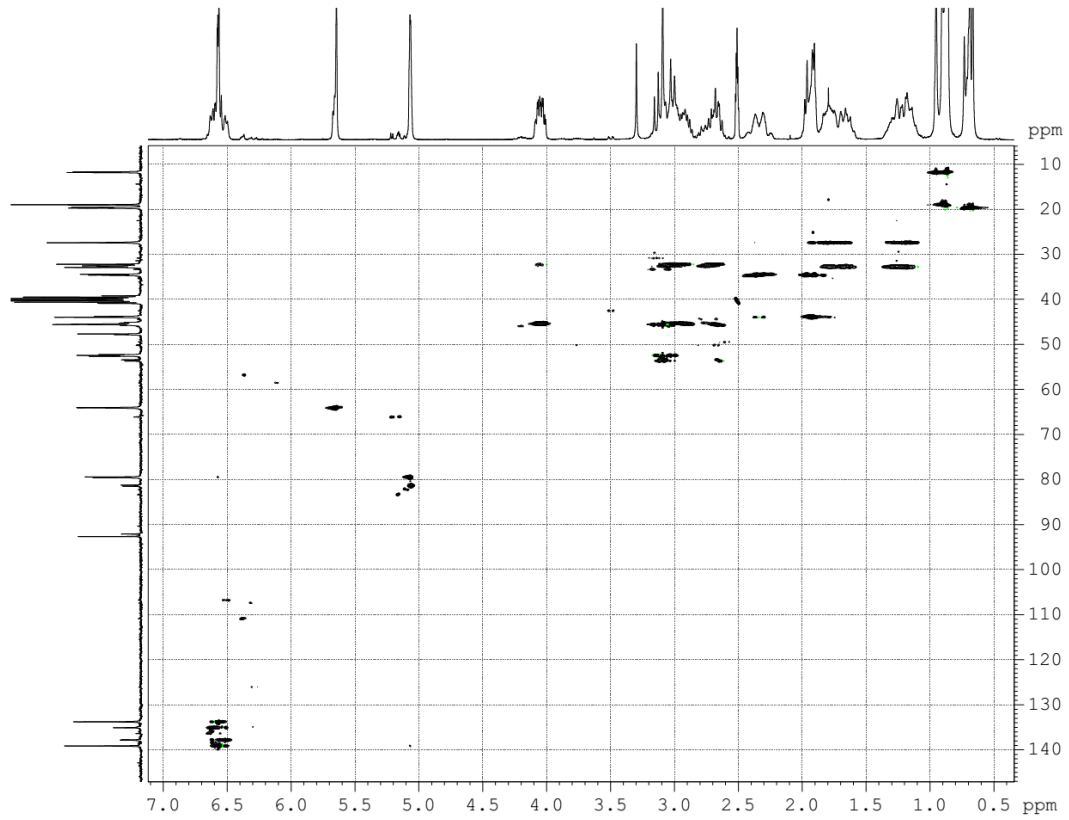

2D  $^1\text{H}$ ,  $^{13}\text{C}$ -HSQC-COSY (DMSO- $d_6$ , 300.1 & 75.5 MHz)

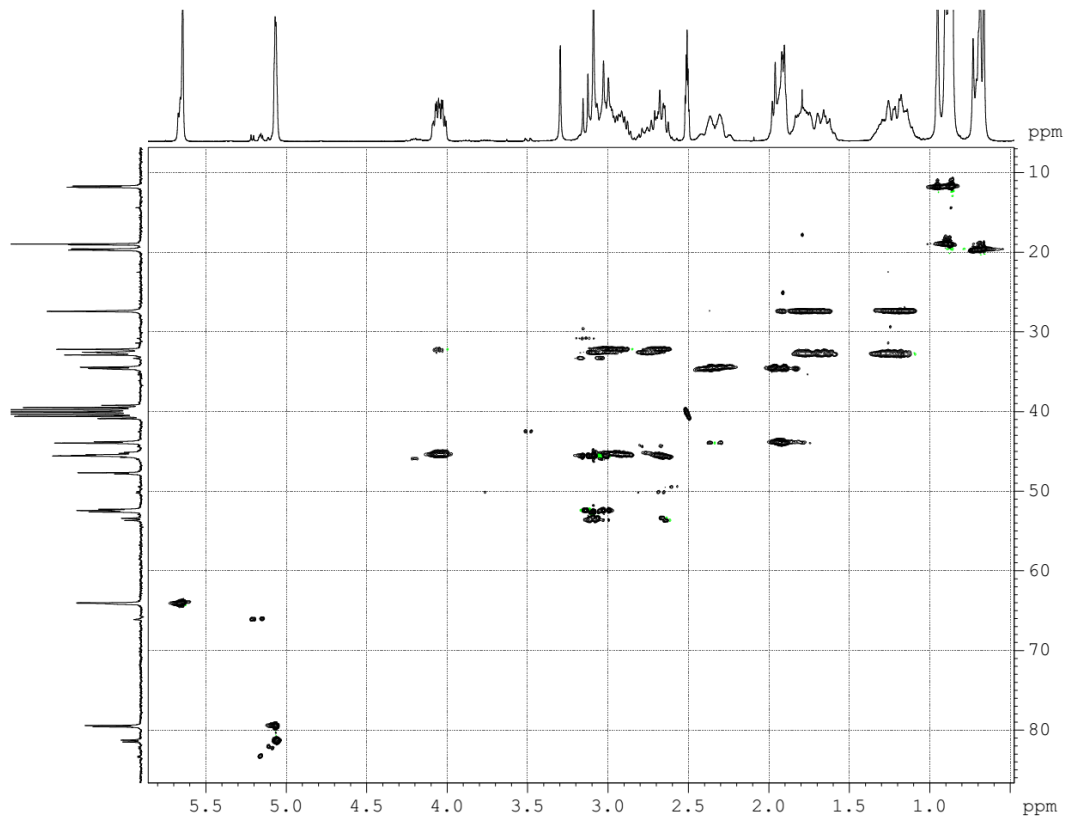

**2D  $^1\text{H}$ ,  $^{15}\text{N}$ -HSQC (DMSO- $d_6$ , 300.1 & 30.4 MHz)**

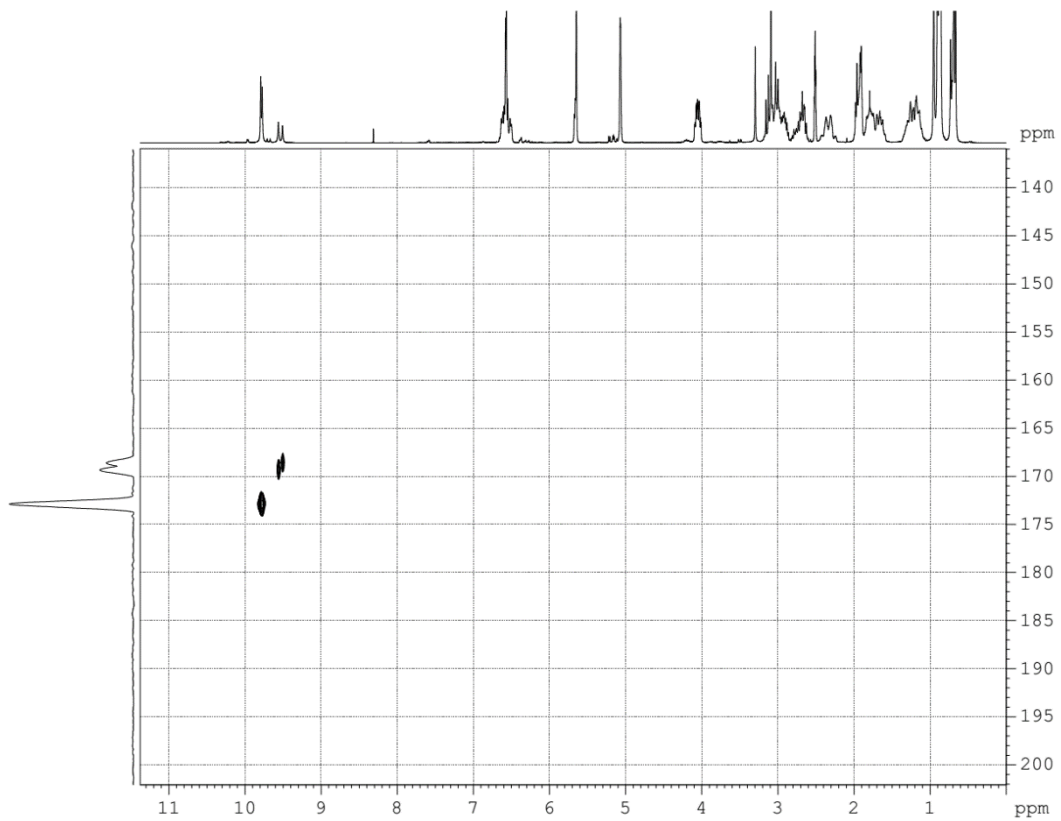

**2D  $^1\text{H}$ ,  $^{15}\text{N}$ -HSQC (DMSO- $d_6$ , 300.1 & 30.4 MHz)**

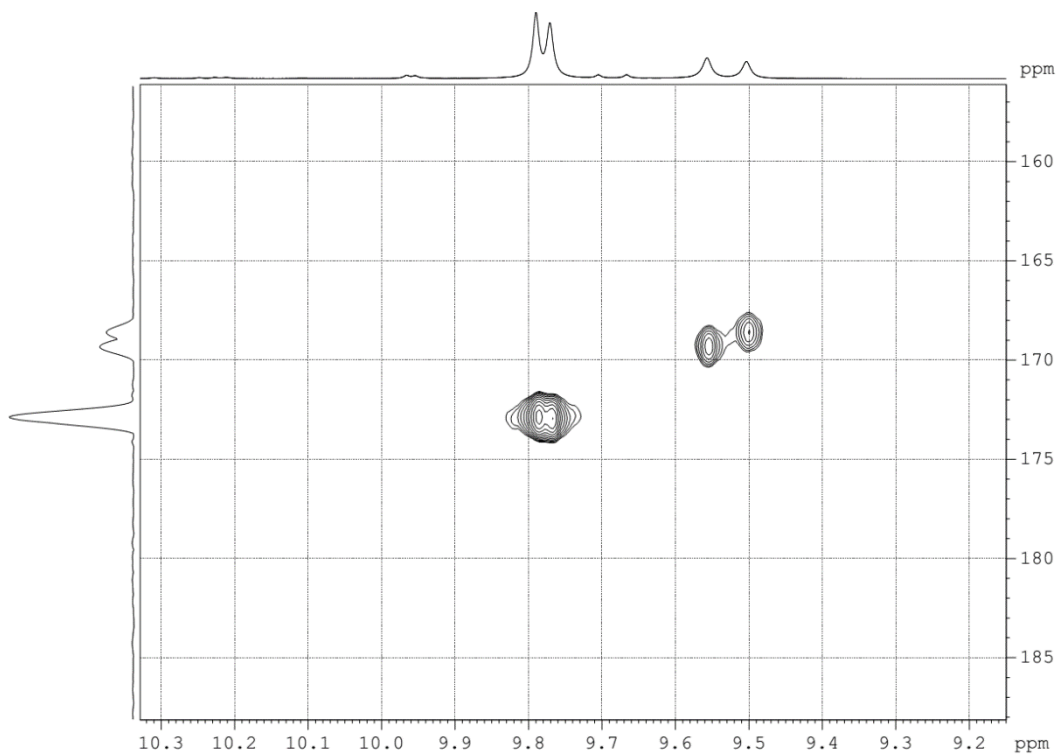

2D  $^1\text{H}$ ,  $^{15}\text{N}$ -HMBC (DMSO- $d_6$ , 300.1 & 30.4 MHz)

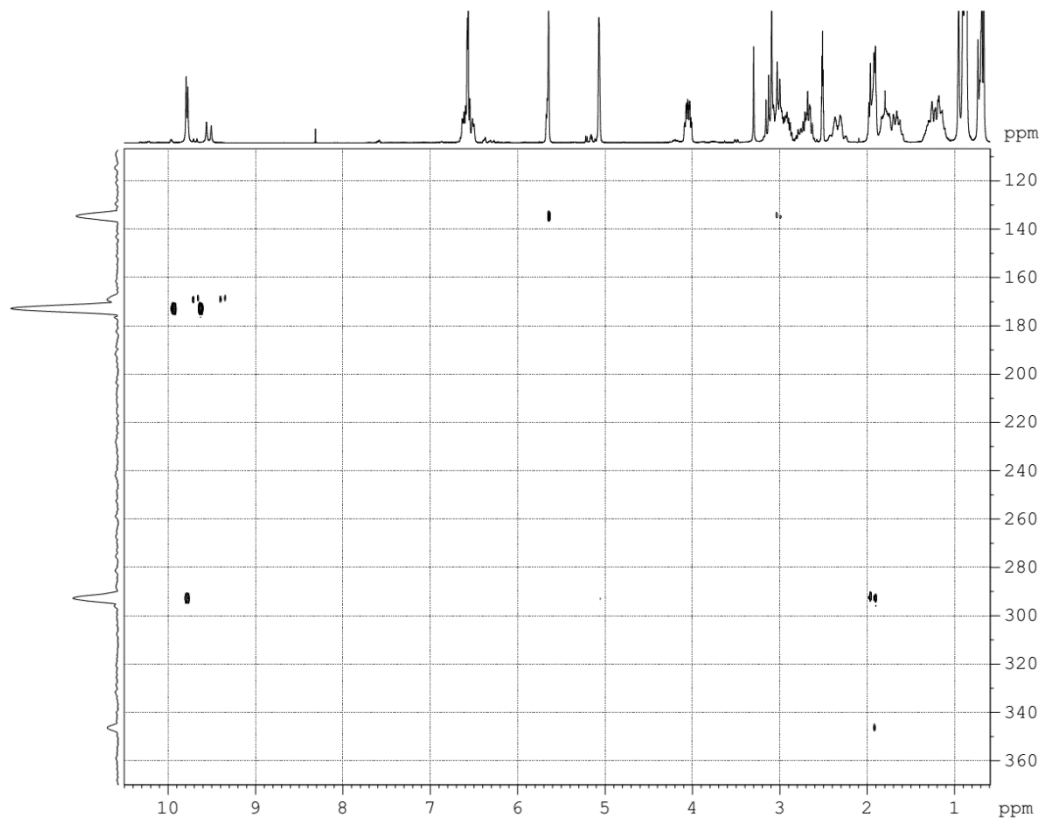

2.13. A mixture of diastereomers (1R,2S,4aR,11aS)-11-oxo-N'-[(1R,2E,4R)-1,7,7-trimethylbicyclo[2.2.1]hept-2-ylidene]-1,2,11,11a-tetrahydro-2,4a-epoxyisoindolo[1,2-b][1,3]benzothiazole-1-carbohydrazide (A) and (1S,2R,4aS,11aR)-11-oxo-N'-[(1R,2E,4R)-1,7,7-trimethylbicyclo[2.2.1]hept-2-ylidene]-1,2,11,11a-tetrahydro-2,4a-epoxyisoindolo[1,2-b][1,3]benzothiazole-1-carbohydrazide (B) 19 (CDCl<sub>3</sub>, 400.0 MHz)

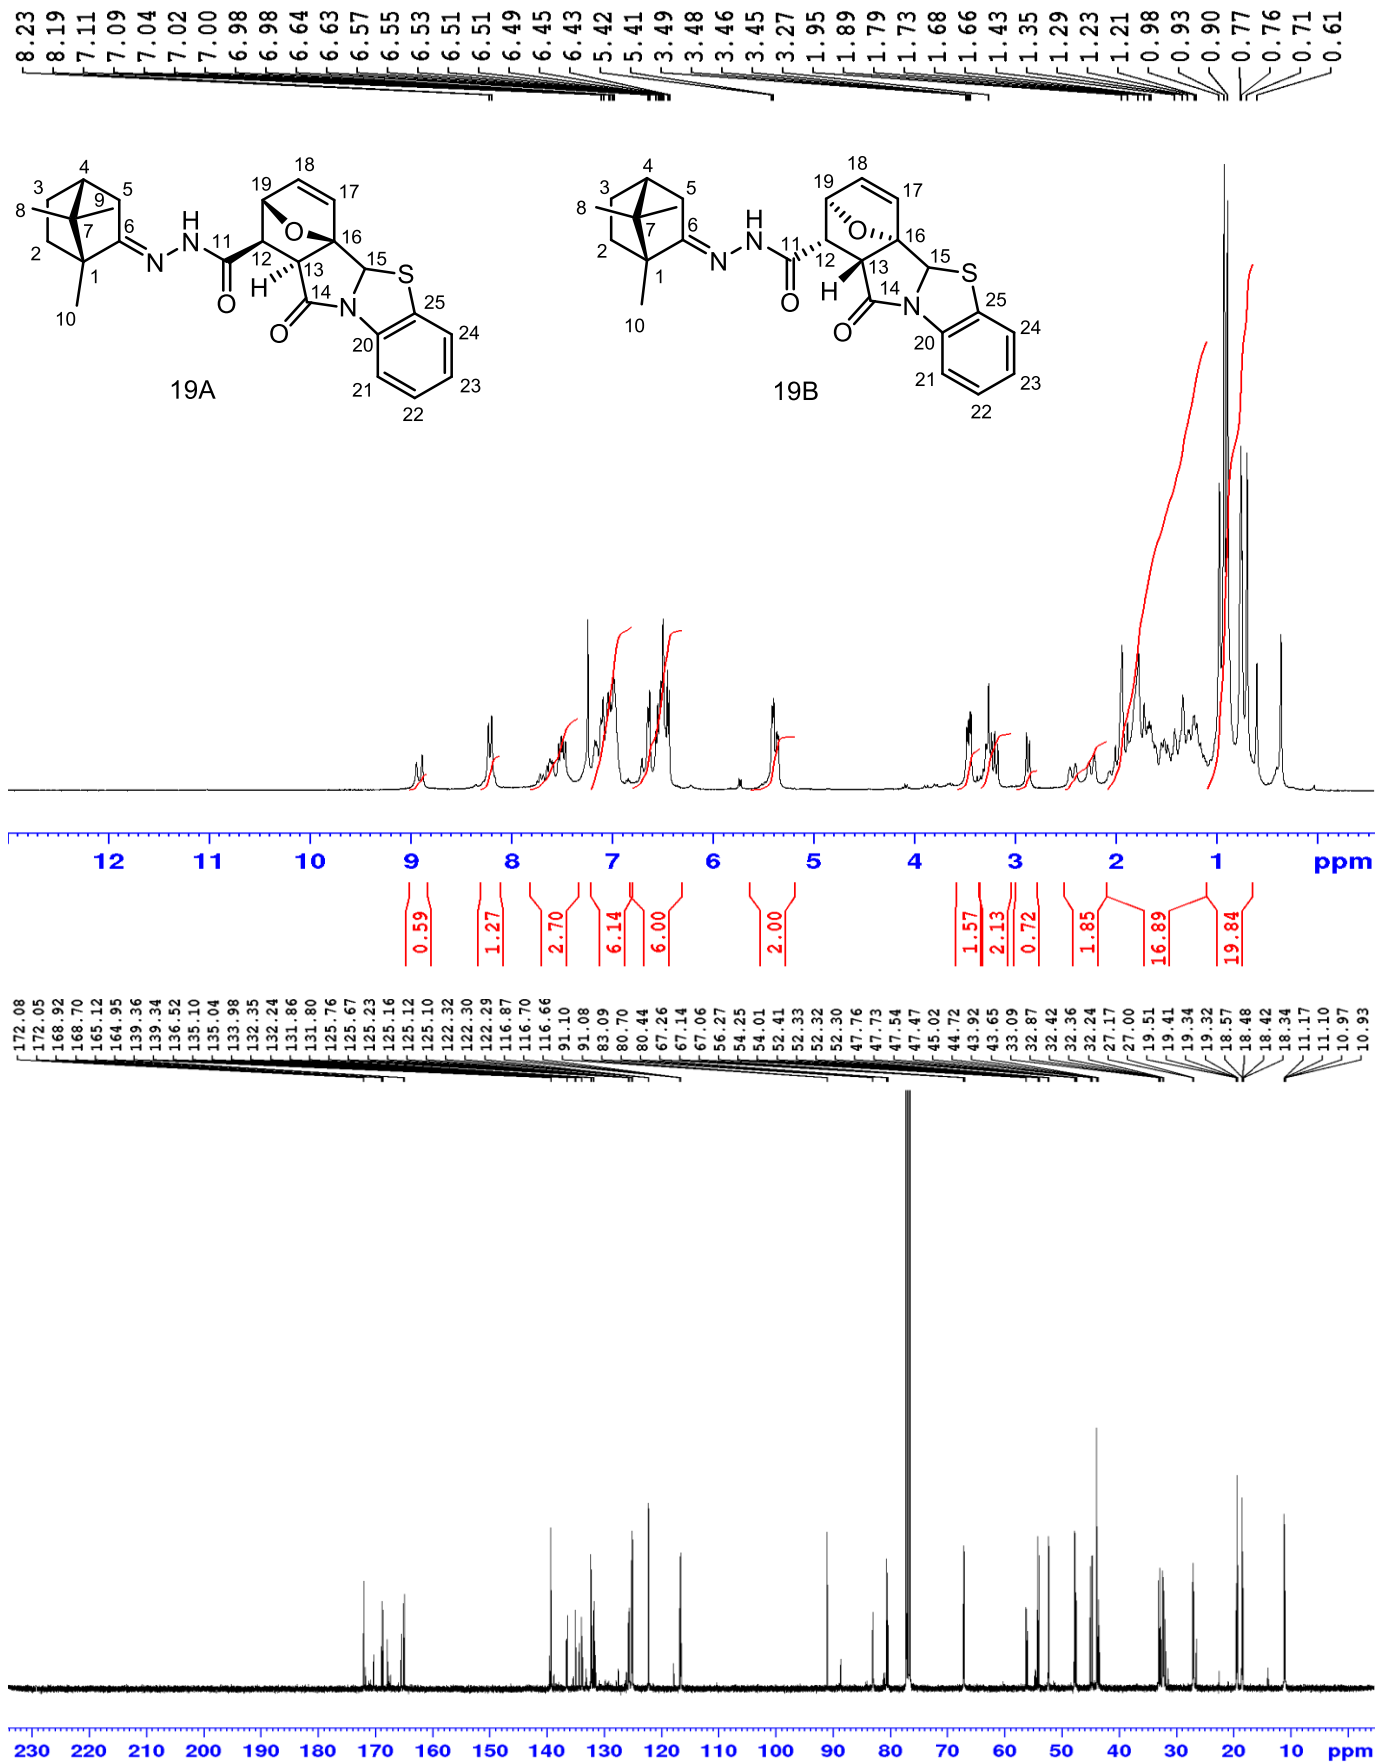

**2.14. A mixture of diastereomers (6aS,7R,8S,10aR,10bR)-6-oxo-N'-[(1R,2E,4R)-1,7,7-trimethylbicyclo[2.2.1]hept-2-ylidene]-3,4,6,6a,7,8-hexahydro-2H-8,10a-epoxy[1,3]oxazino[2,3-a]isoindole-7(10bH)-carbohydrazide (A) and (6aR,7S,8R,10aS,10bS)-6-oxo-N'-[(1R,2E,4R)-1,7,7-trimethylbicyclo[2.2.1]hept-2-ylidene]-3,4,6,6a,7,8-hexahydro-2H-8,10a-epoxy[1,3]oxazino[2,3-a]isoindole-7(10bH)-carbohydrazide (B) 18 (DMSO-*d*<sub>6</sub>, 300 & 75.5 MHz)**

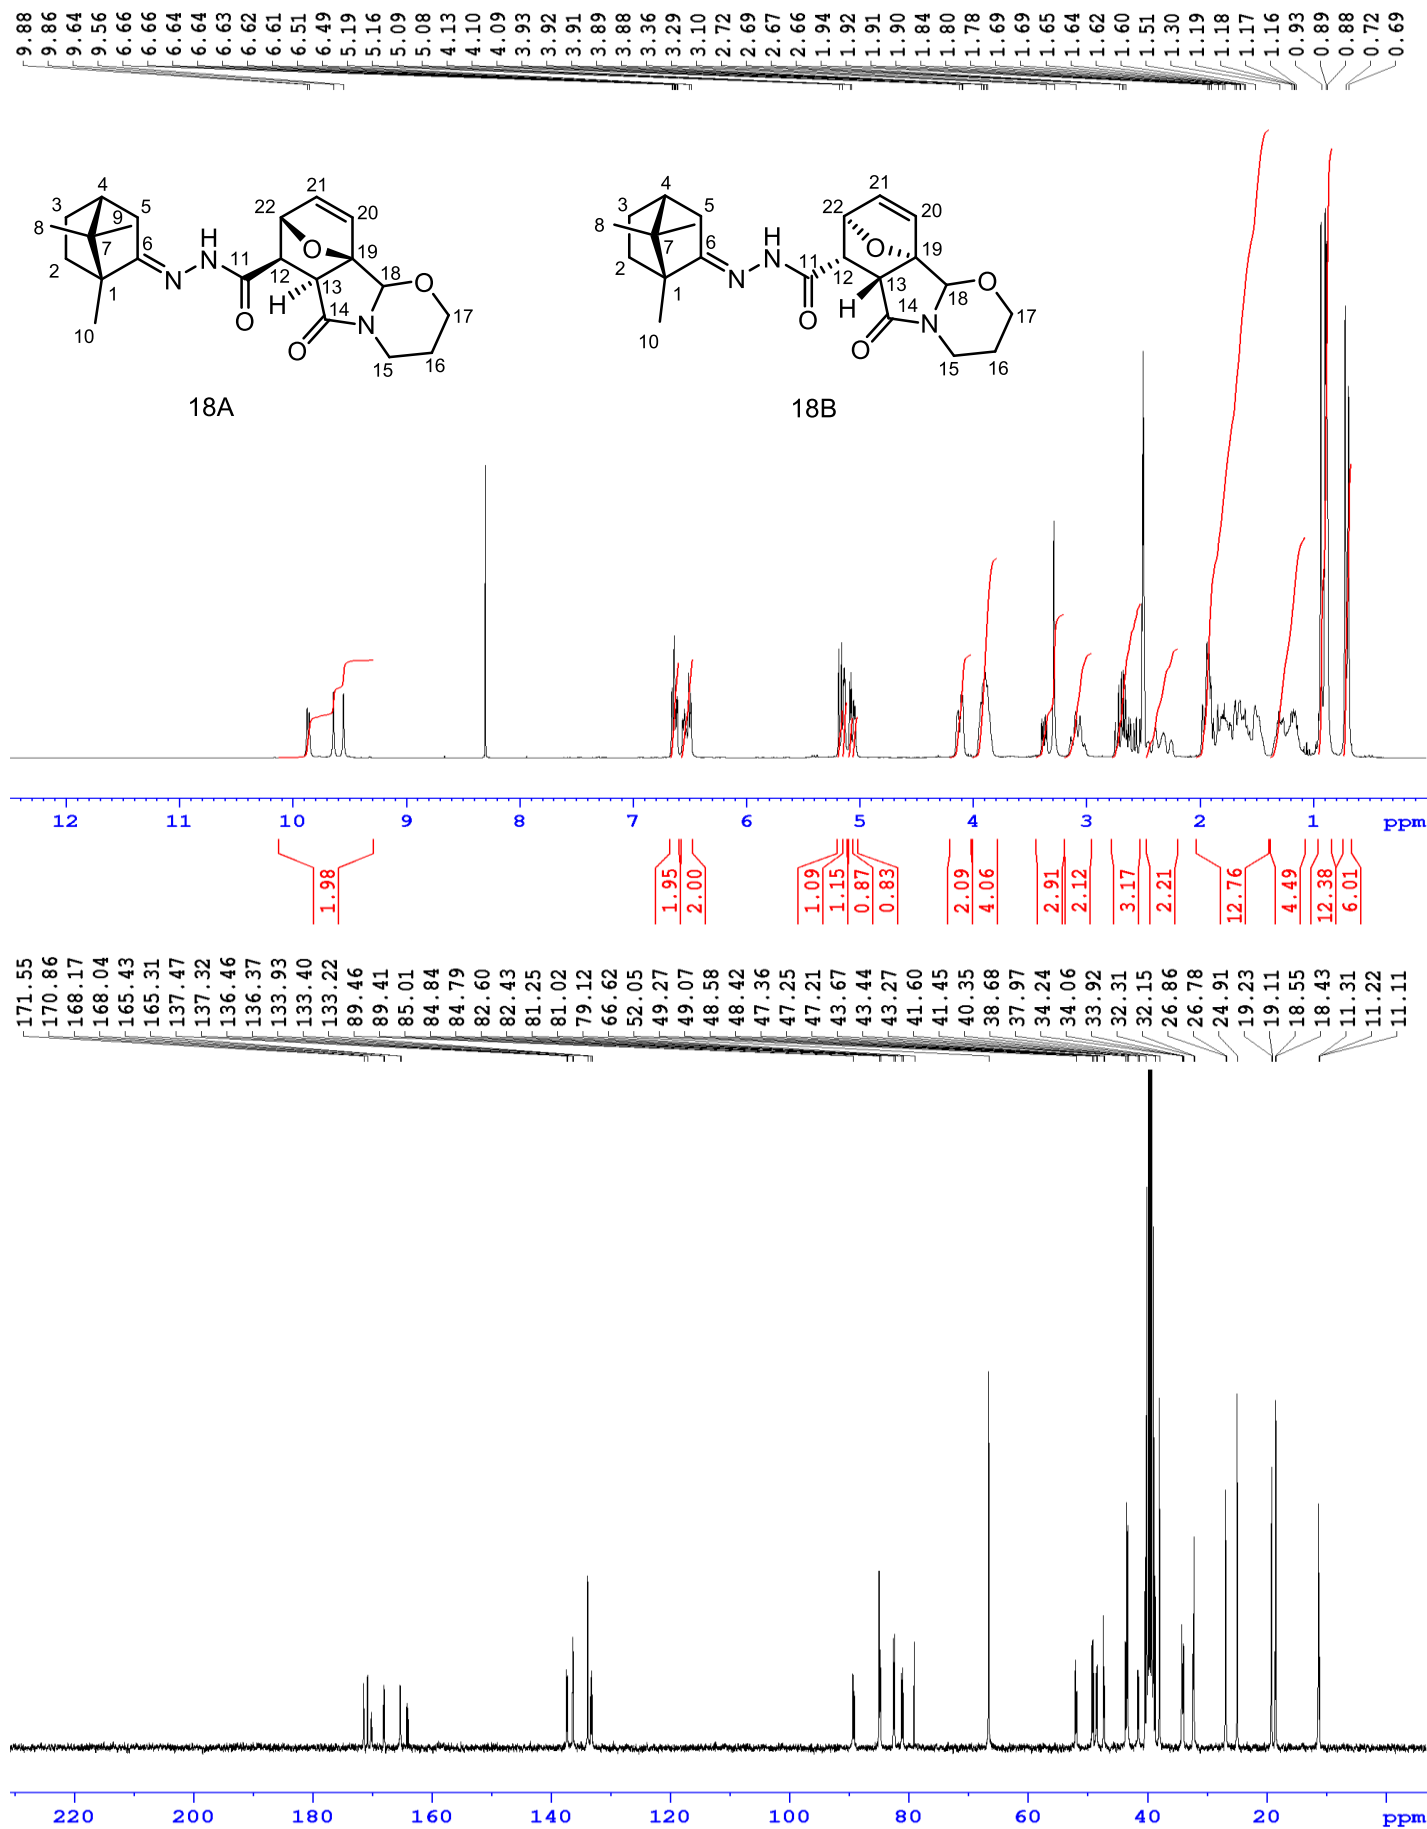

$^{13}\text{C}\{^1\text{H}\}$  NMR (DMSO- $d_6$ , 75.5 MHz)

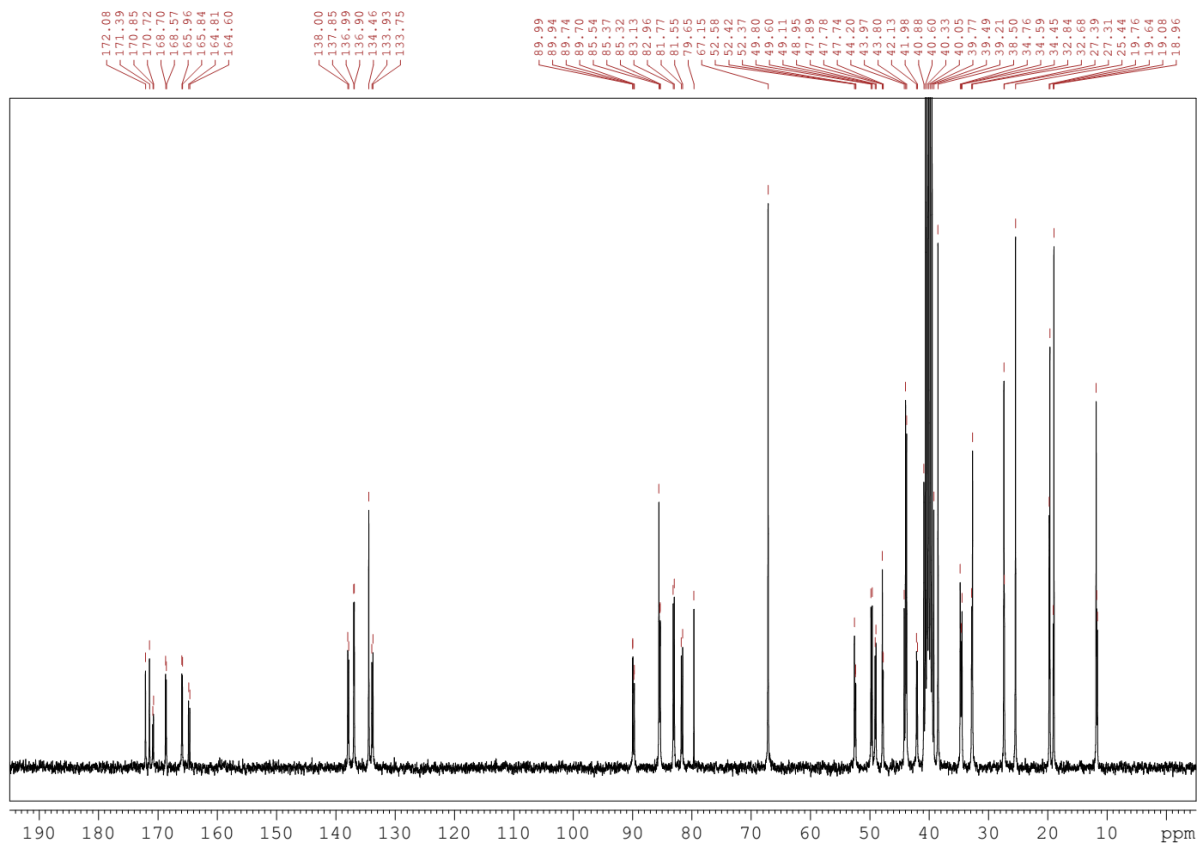

$^{13}\text{C}\{^1\text{H}\}$  NMR (DMSO- $d_6$ , 75.5 MHz)

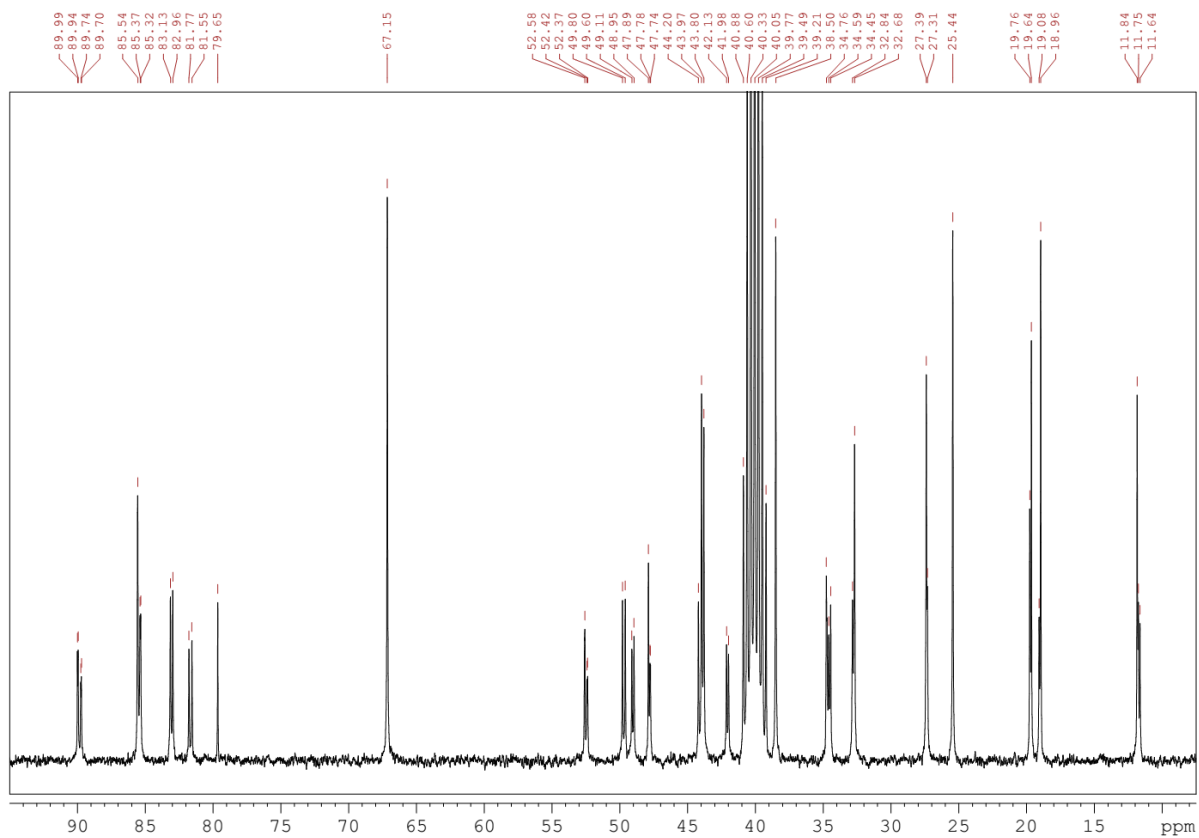

DEPT-135 NMR (DMSO-*d*<sub>6</sub>, 75.5 MHz)

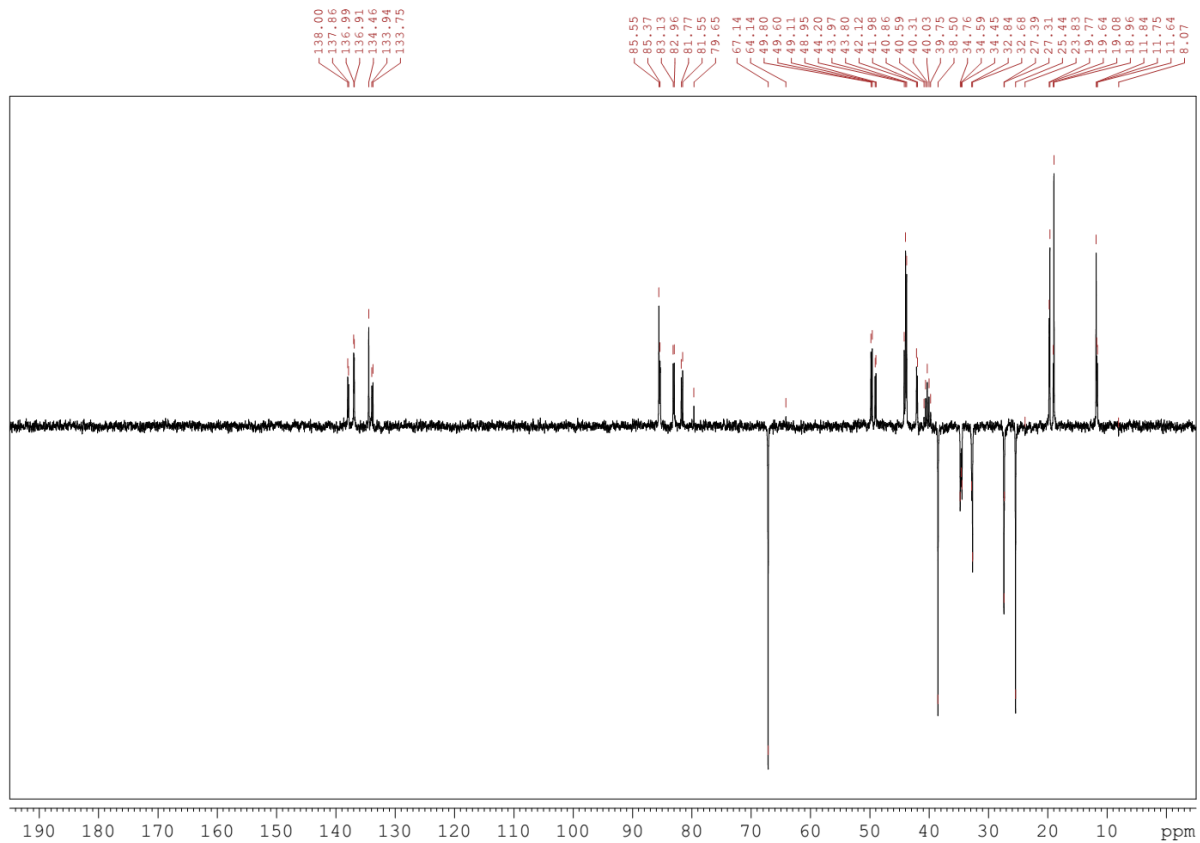

2D <sup>1</sup>H,<sup>1</sup>H-COSY (DMSO-*d*<sub>6</sub>, 300.1 MHz)

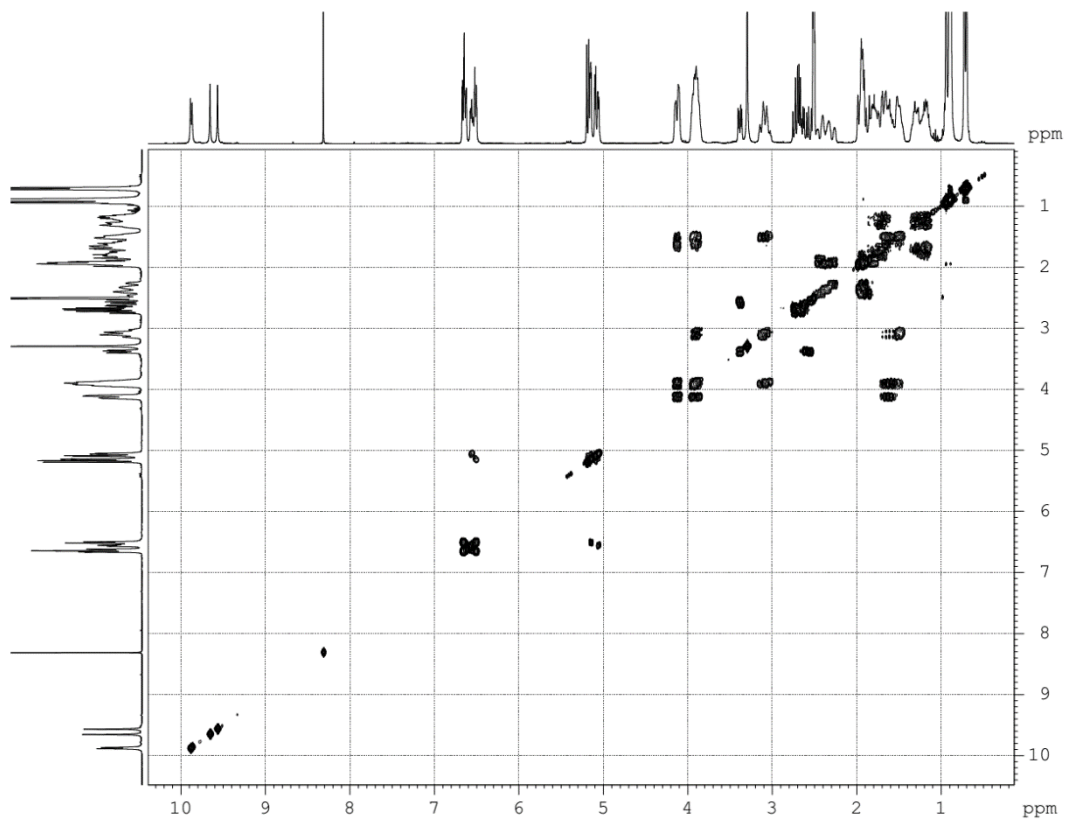

2D  $^1\text{H}$ ,  $^1\text{H}$ -TOCSY (DMSO- $d_6$ , 300.1 MHz)

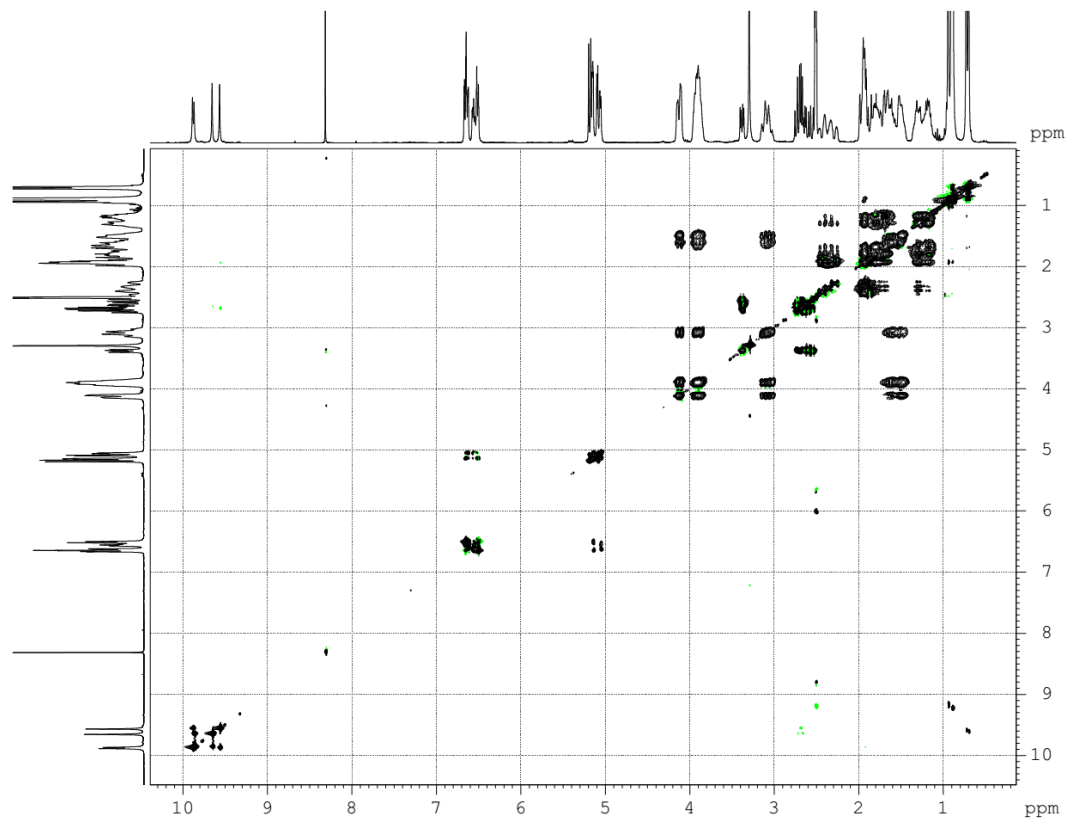

2D  $^1\text{H}$ ,  $^1\text{H}$ -NOESY (DMSO- $d_6$ , 300.1 MHz)

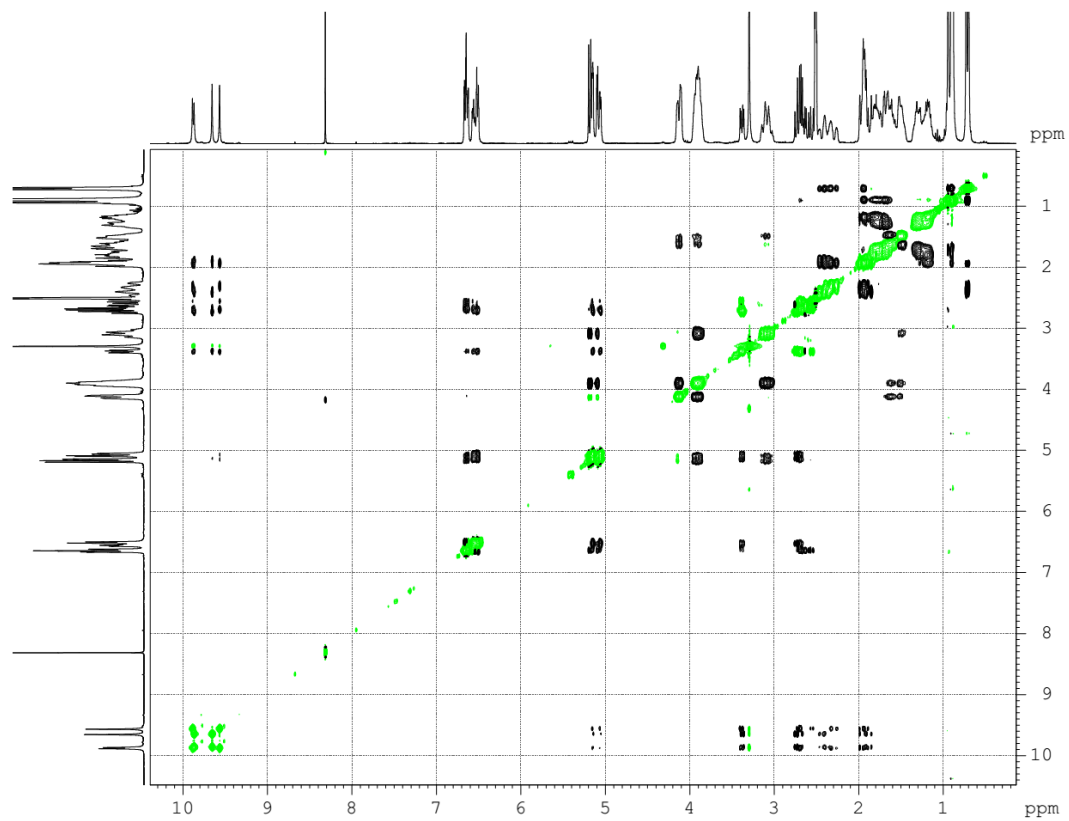



2D  $^1\text{H}$ ,  $^1\text{H}$ -NOESY (DMSO- $d_6$ , 300.1 MHz)

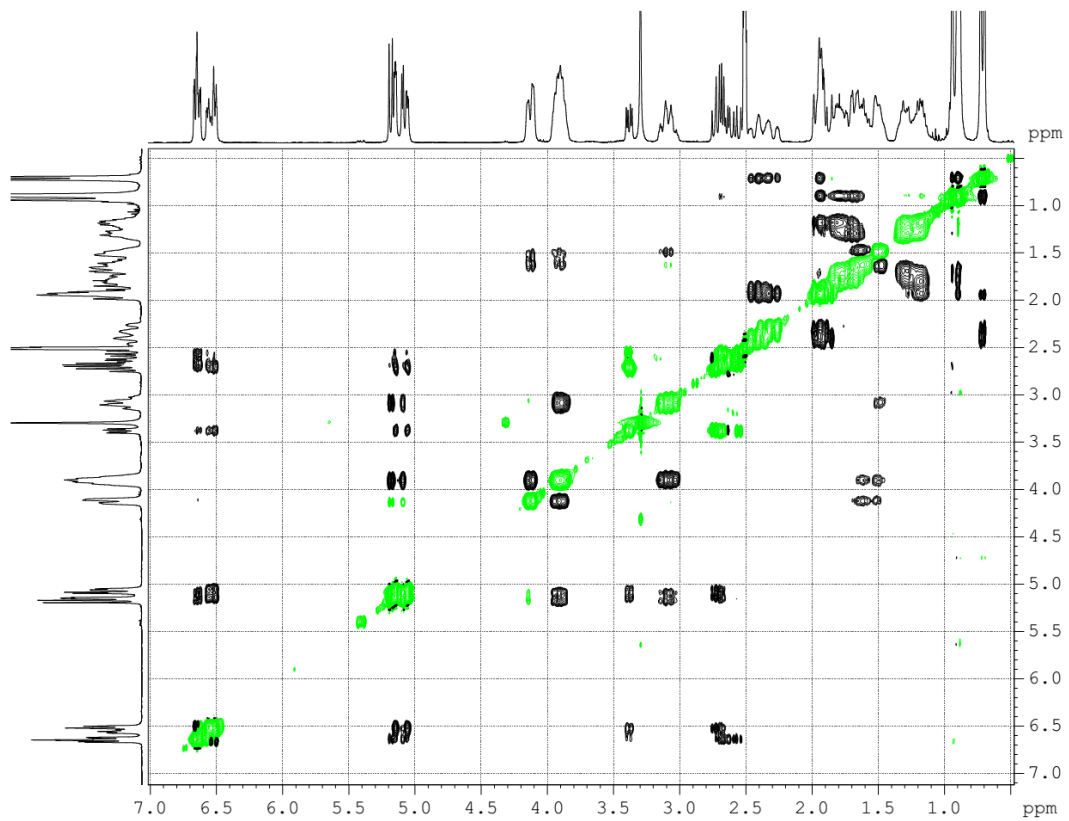

2D  $^1\text{H}$ ,  $^{13}\text{C}$ -edited-HSQC (DMSO- $d_6$ , 300.1 & 75.5 MHz)

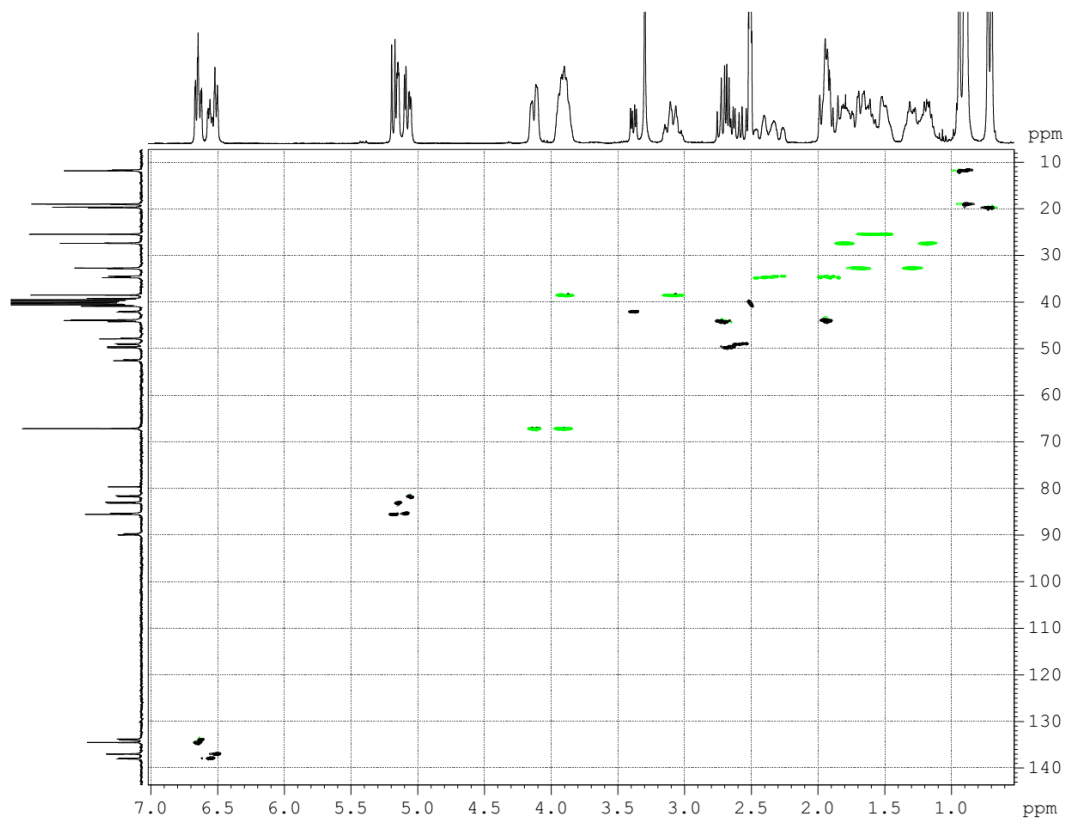

**2D  $^1\text{H}$ ,  $^{13}\text{C}$ -edited-HSQC (DMSO- $d_6$ , 300.1 & 75.5 MHz)**

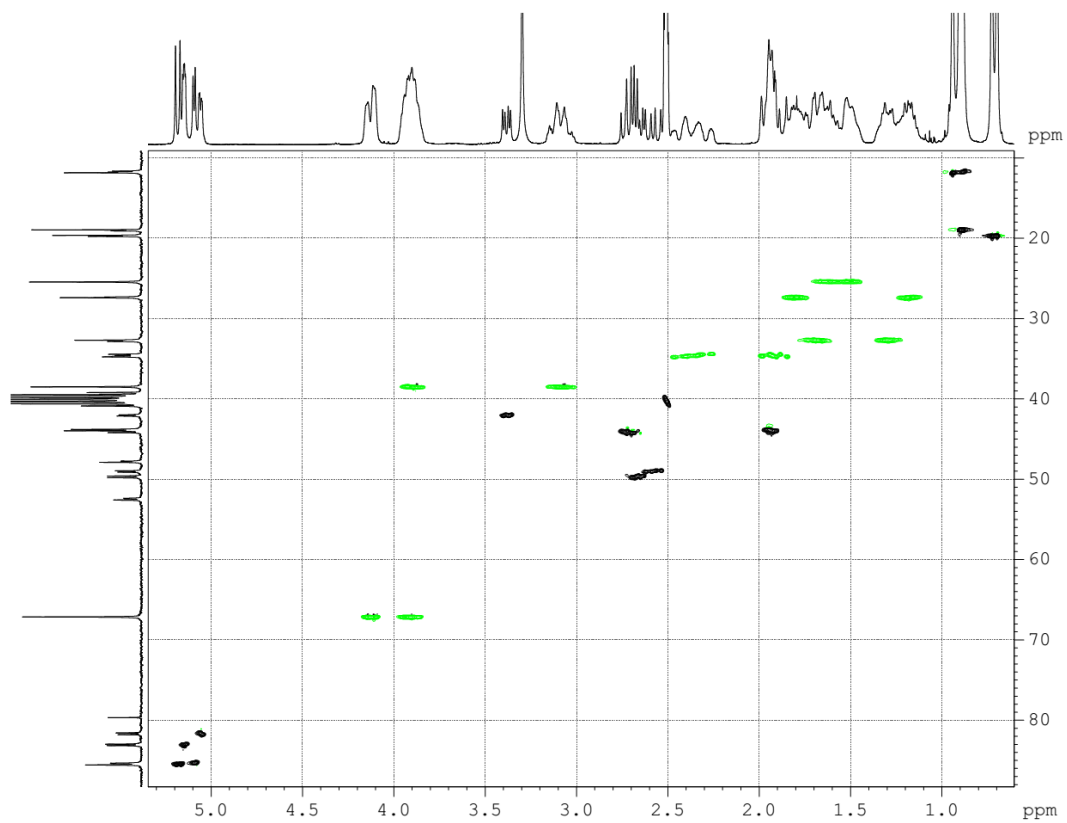

**2D  $^1\text{H}$ ,  $^{13}\text{C}$ -HMBC (DMSO- $d_6$ , 300.1 & 75.5 MHz)**

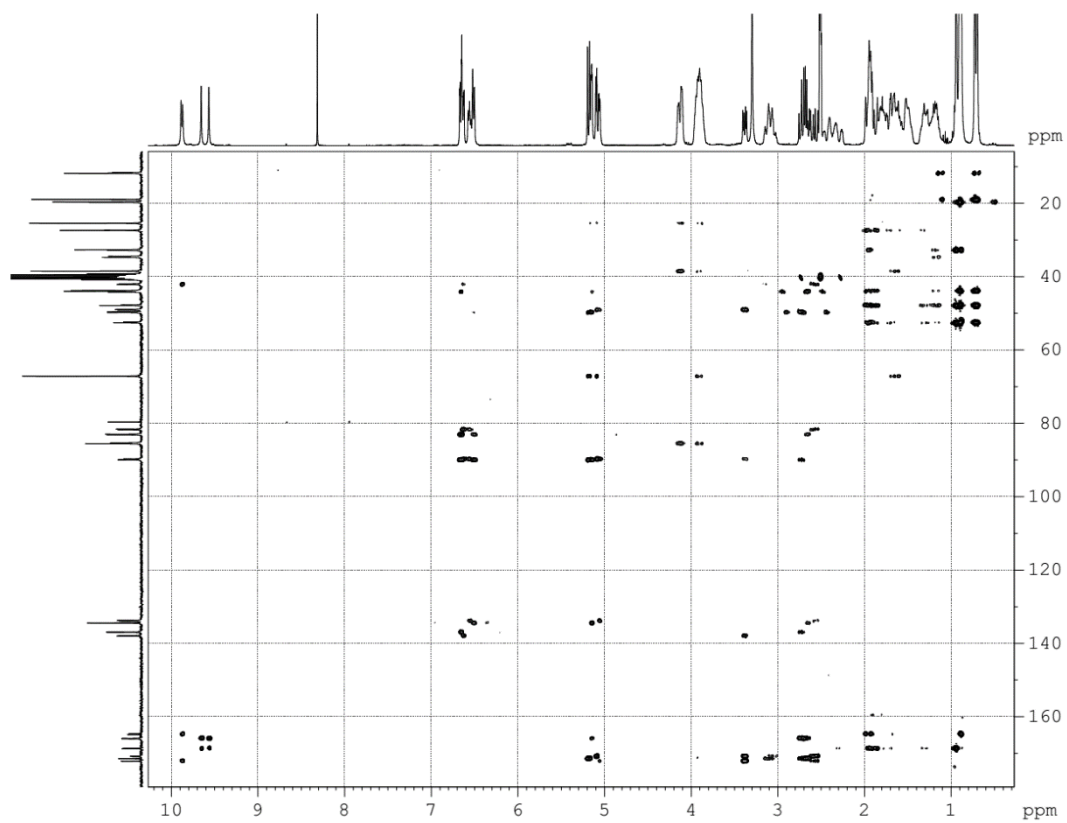

2D  $^1\text{H}$ ,  $^{13}\text{C}$ -HMBC (DMSO- $d_6$ , 300.1 & 75.5 MHz)

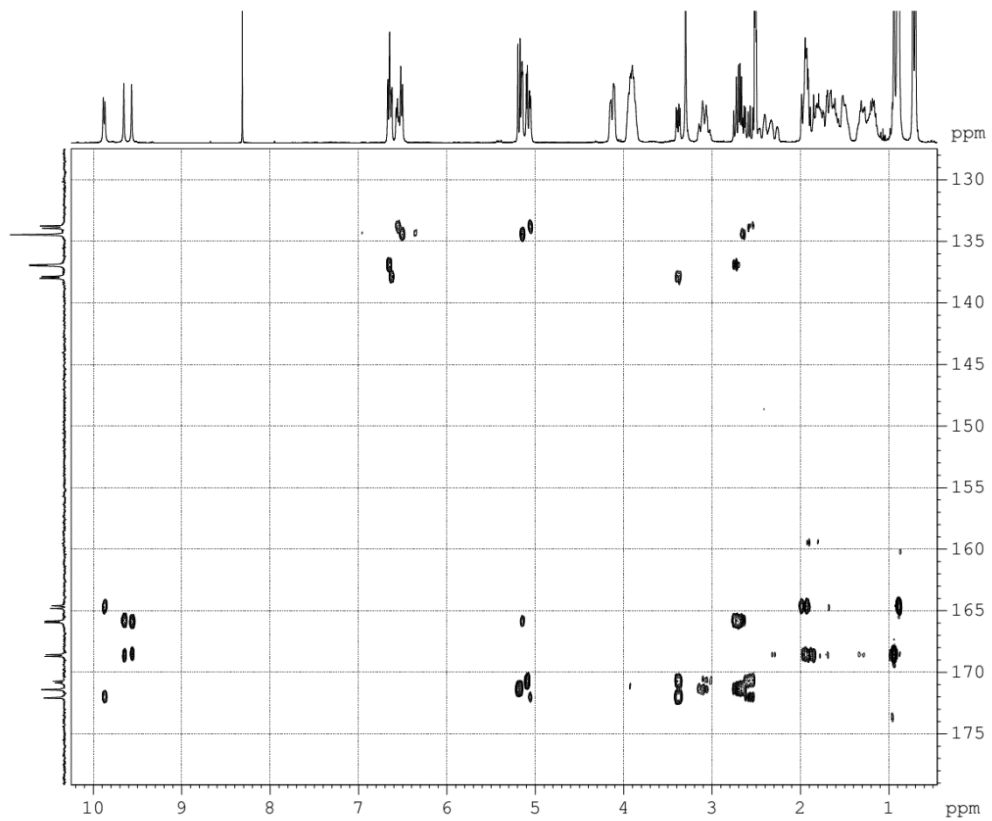

2D  $^1\text{H}$ ,  $^{13}\text{C}$ -HMBC (DMSO- $d_6$ , 300.1 & 75.5 MHz)

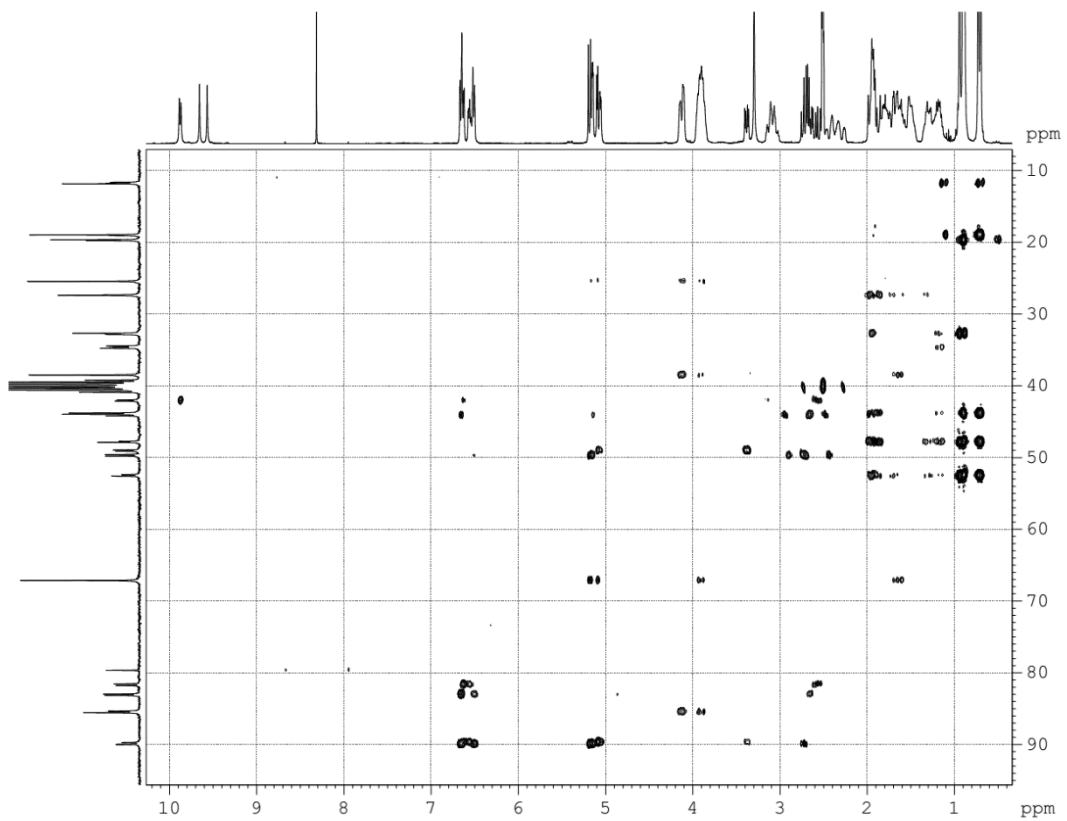

2D  $^1\text{H}$ ,  $^{13}\text{C}$ -HSQC-COSY (DMSO- $d_6$ , 300.1 & 75.5 MHz)

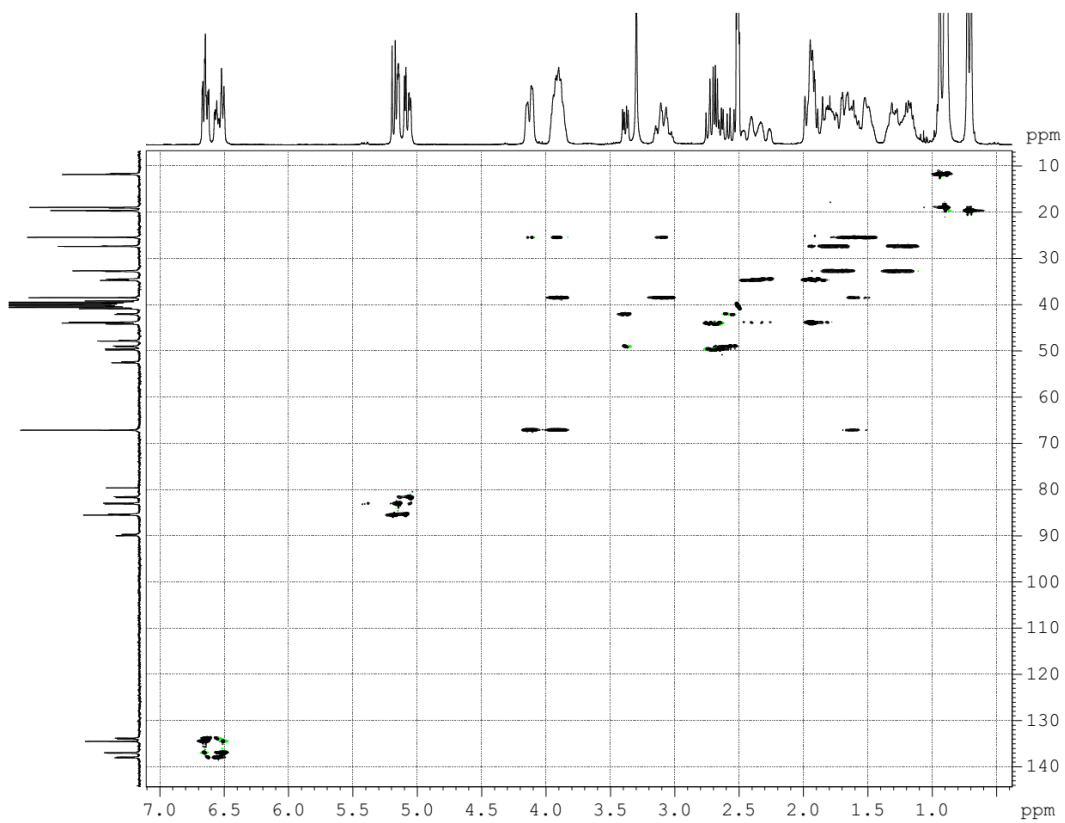

2D  $^1\text{H}$ ,  $^{13}\text{C}$ -HSQC-COSY (DMSO- $d_6$ , 300.1 & 75.5 MHz)

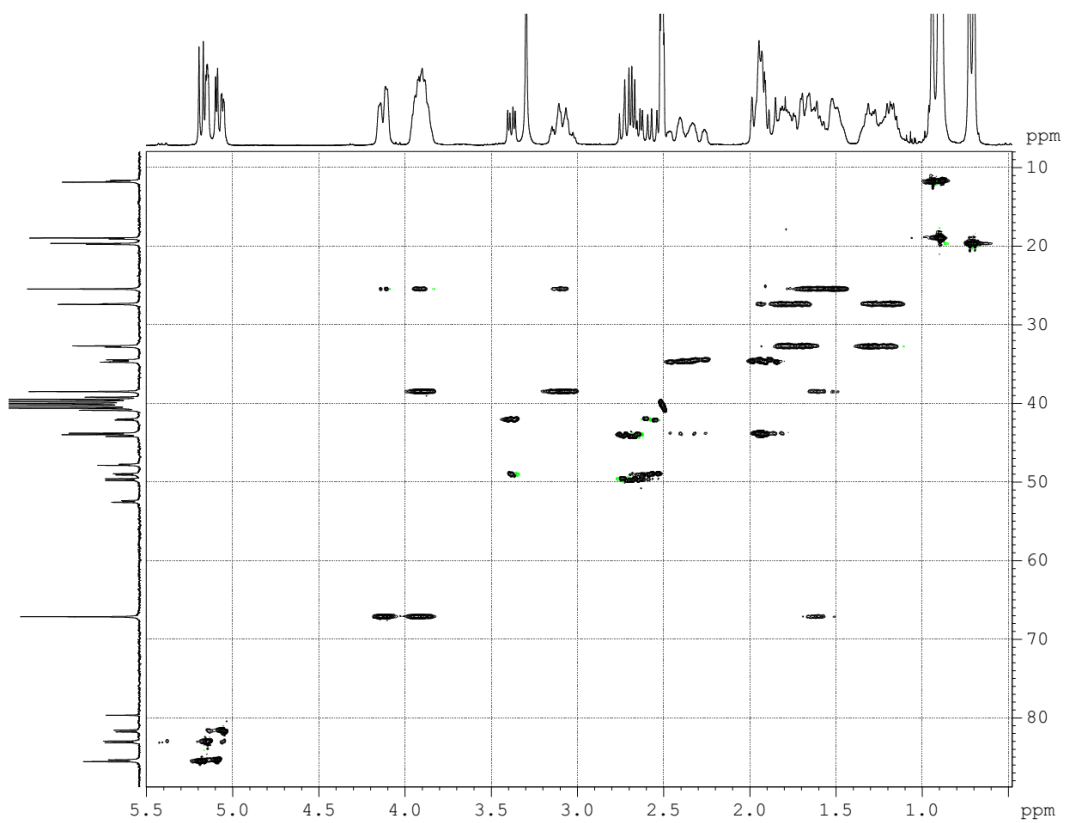

**2D  $^1\text{H}$ ,  $^{15}\text{N}$ -HSQC (DMSO- $d_6$ , 300.1 & 30.4 MHz)**

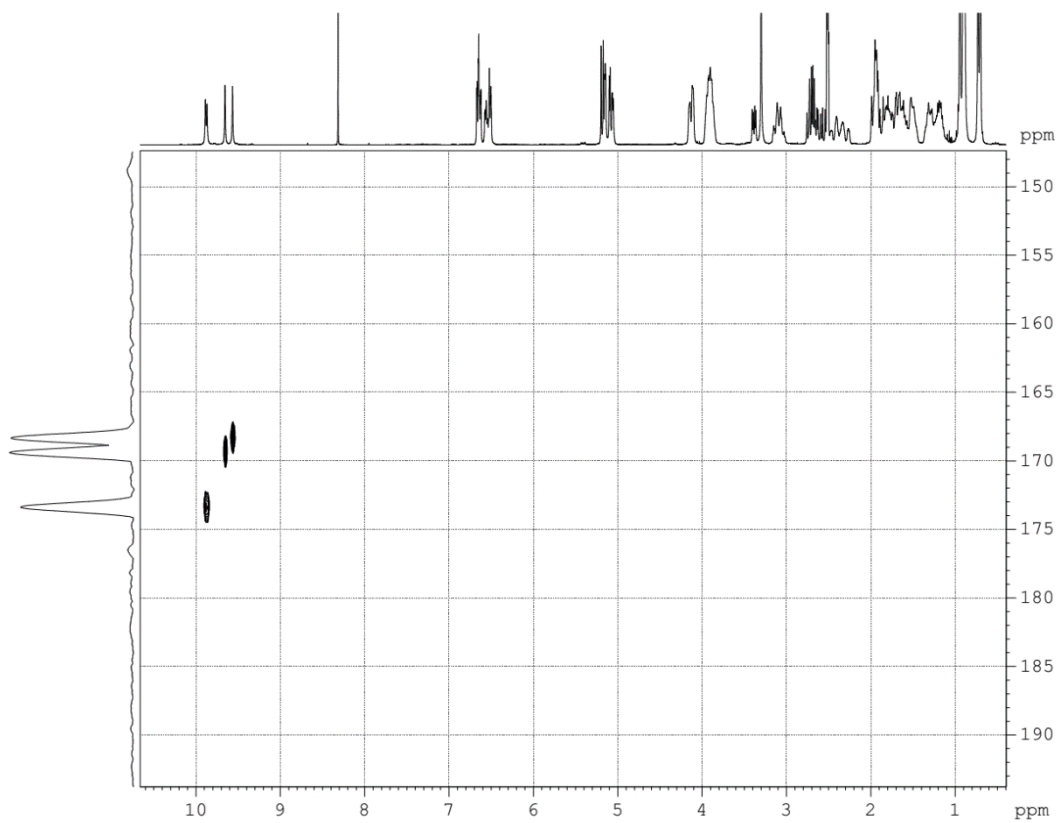

**2D  $^1\text{H}$ ,  $^{15}\text{N}$ -HSQC (DMSO- $d_6$ , 300.1 & 30.4 MHz)**

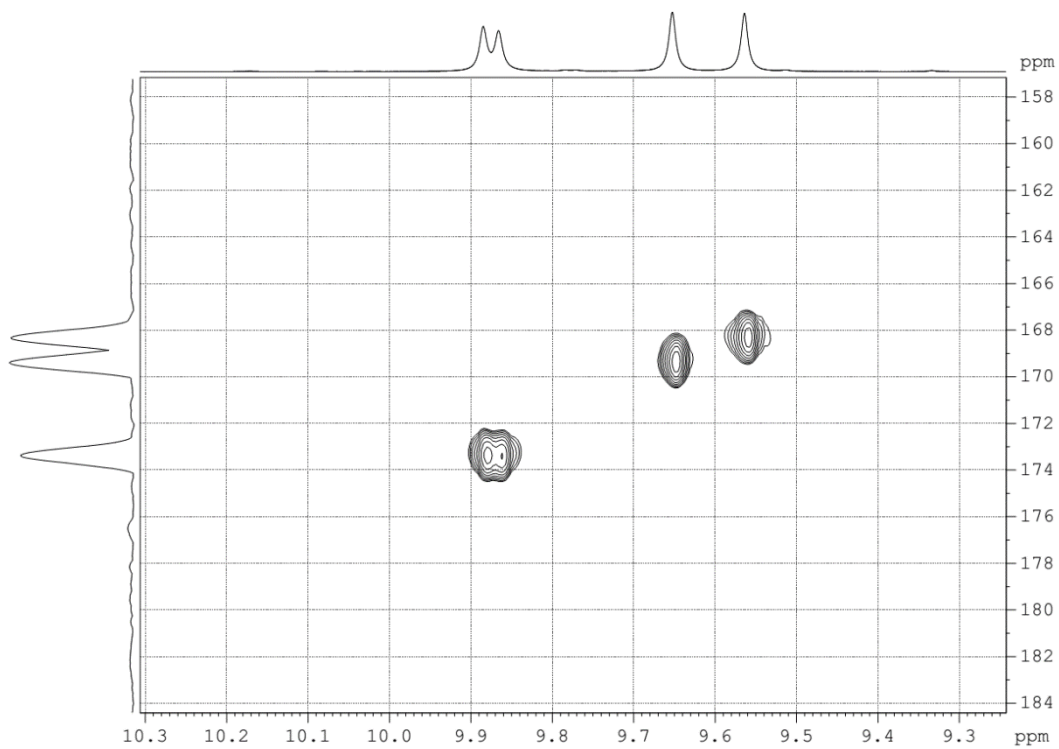

2D  $^1\text{H}, ^{15}\text{N}$ -HMBC (DMSO- $d_6$ , 300.1 & 30.4 MHz)

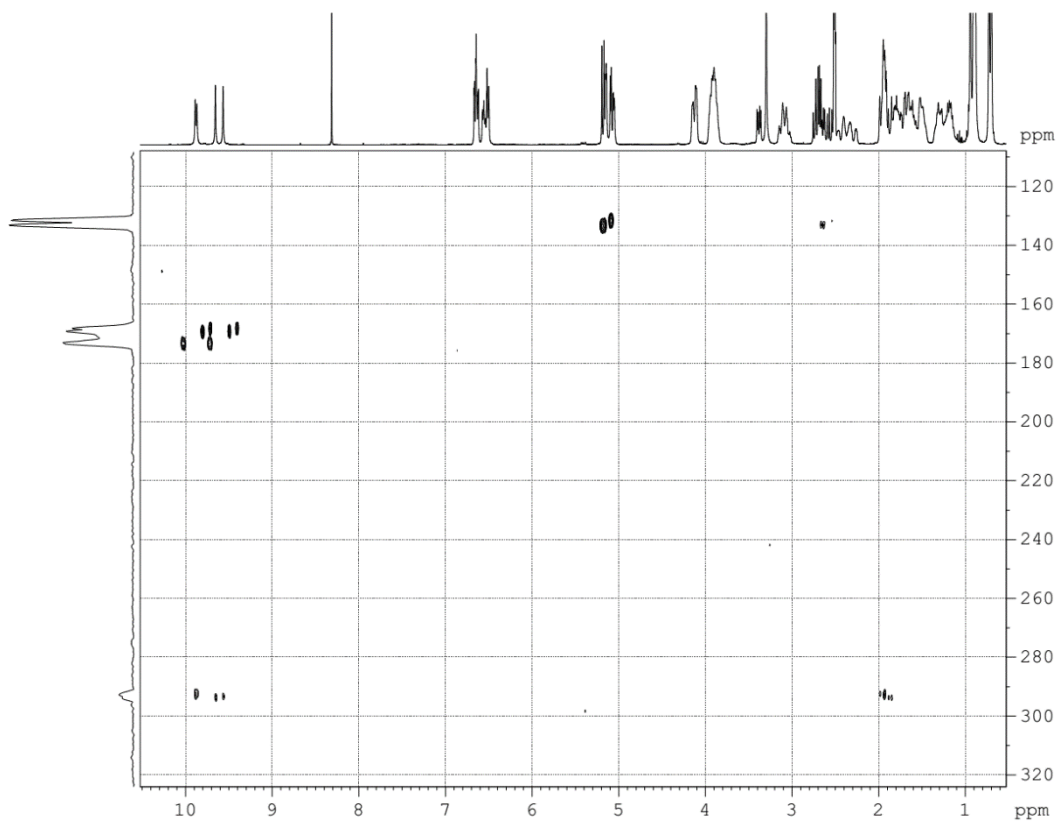

### 3. Copies of the IR Spectra for selected compounds

#### 3.1. (E)-N'-((1R,4R)-1,7,7-trimethylbicyclo[2.2.1]heptan-2-ylidene)acetohydrazide (6)

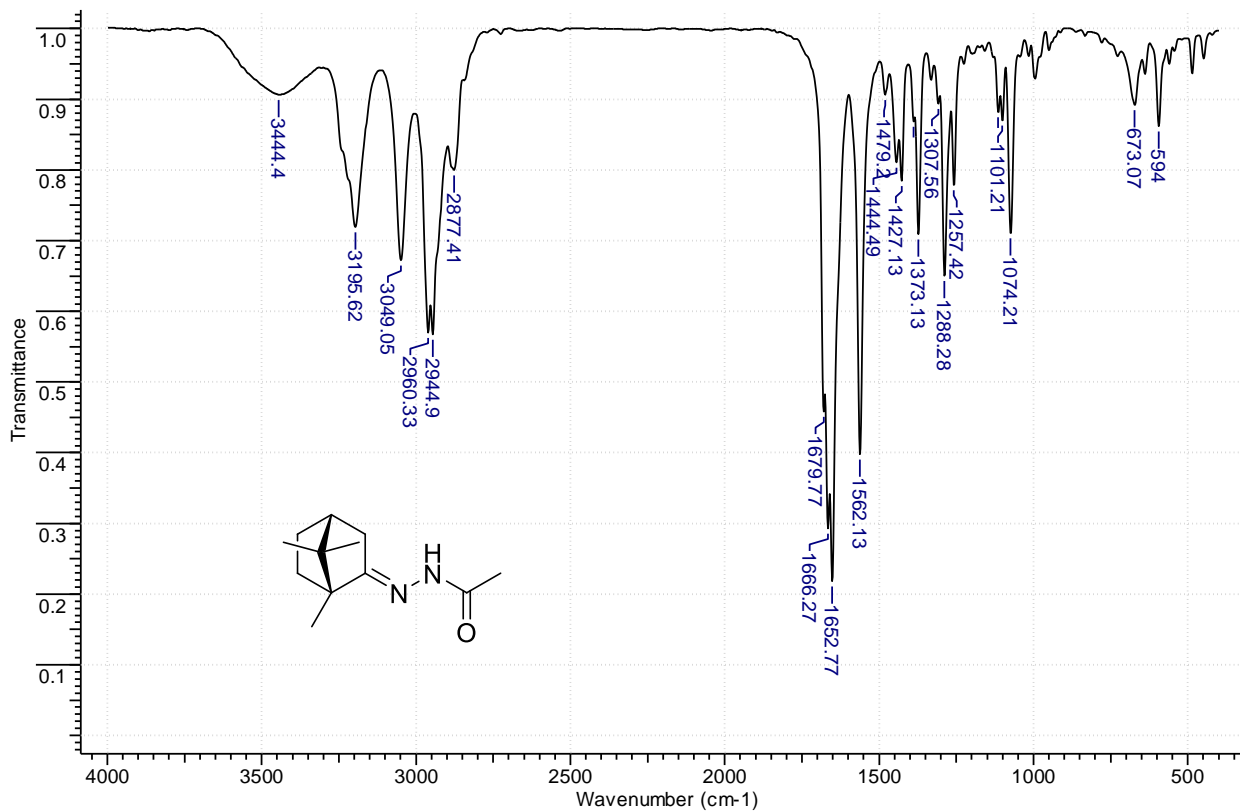

#### 3.2. (E)-2,2,2-trifluoro-N'-((1R,4R)-1,7,7-trimethylbicyclo[2.2.1]heptan-2-ylidene)acetohydrazide (7)

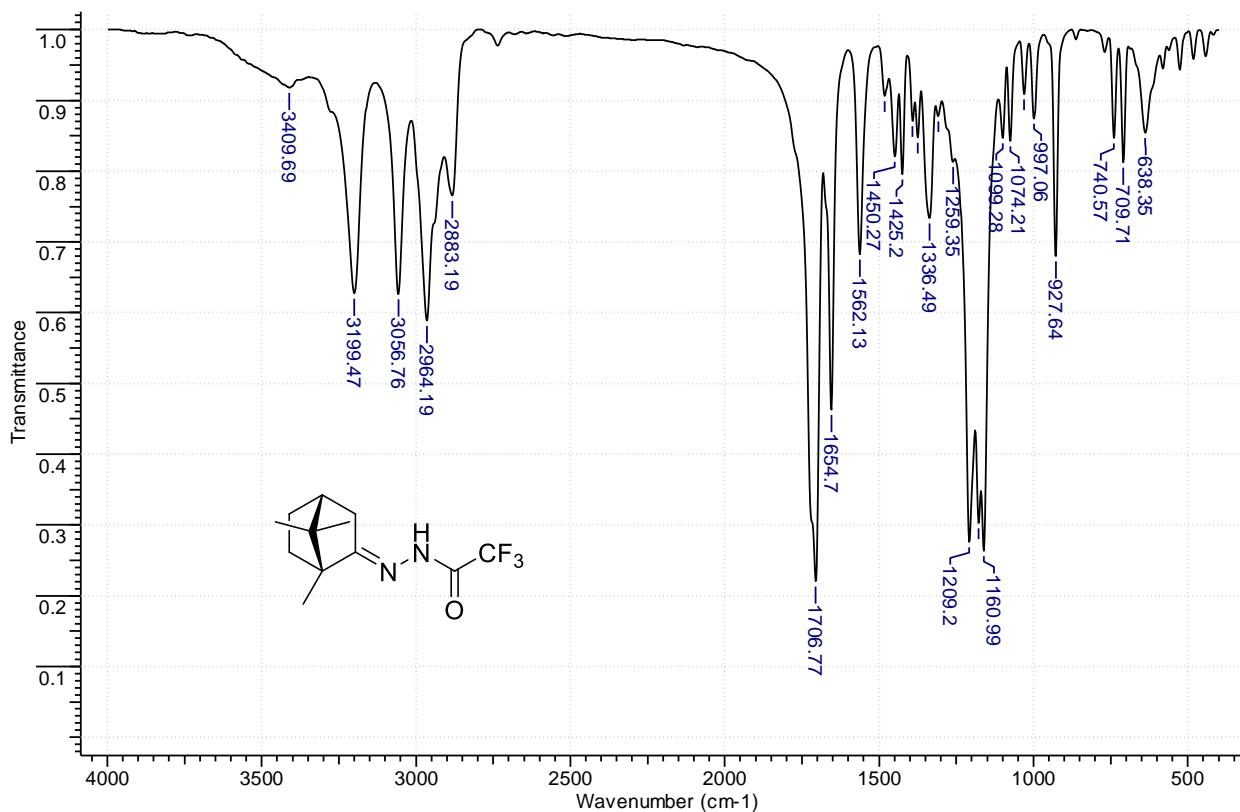

### 3.3 (E)-N'-((1R,4R)-1,7,7-trimethylbicyclo[2.2.1]heptan-2-ylidene)butyrylhydrazide (8)

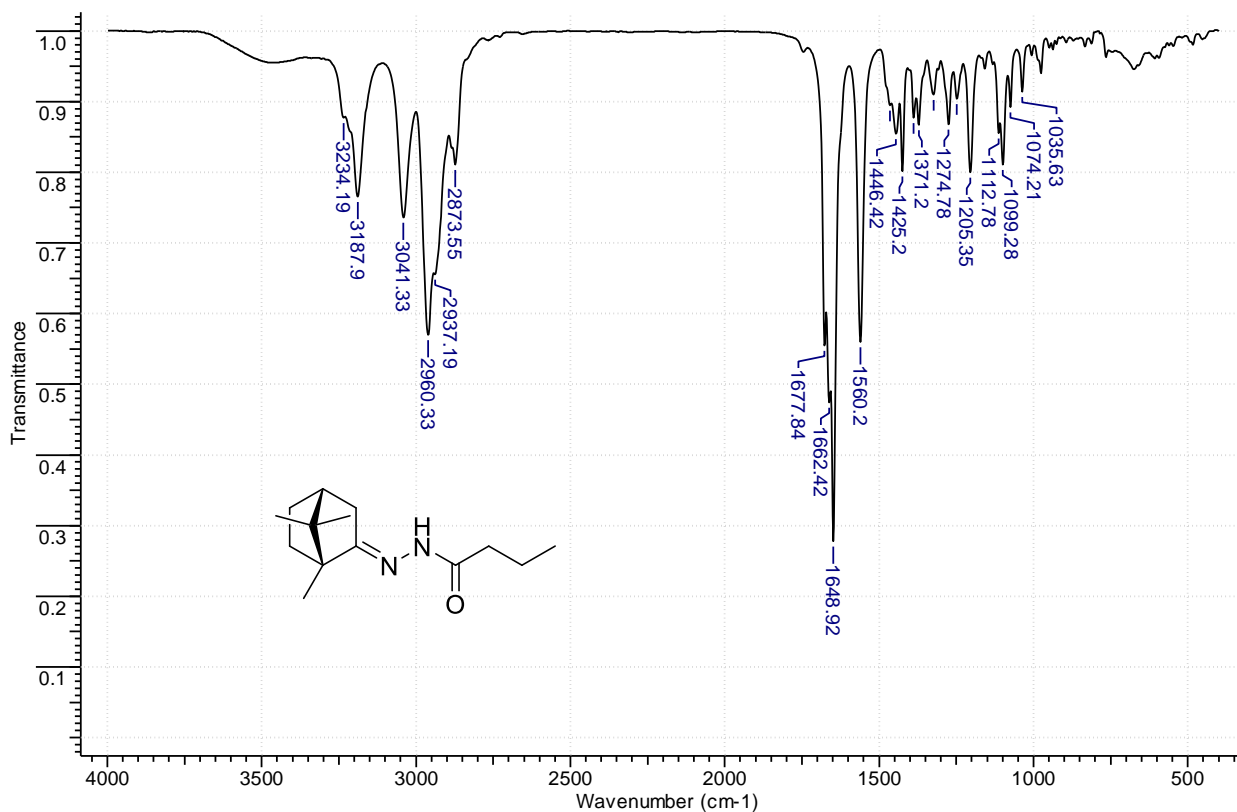

### 3.4 (E)-N'-((1R,4R)-1,7,7-trimethylbicyclo[2.2.1]heptan-2-ylidene)benzoylhydrazide (9)

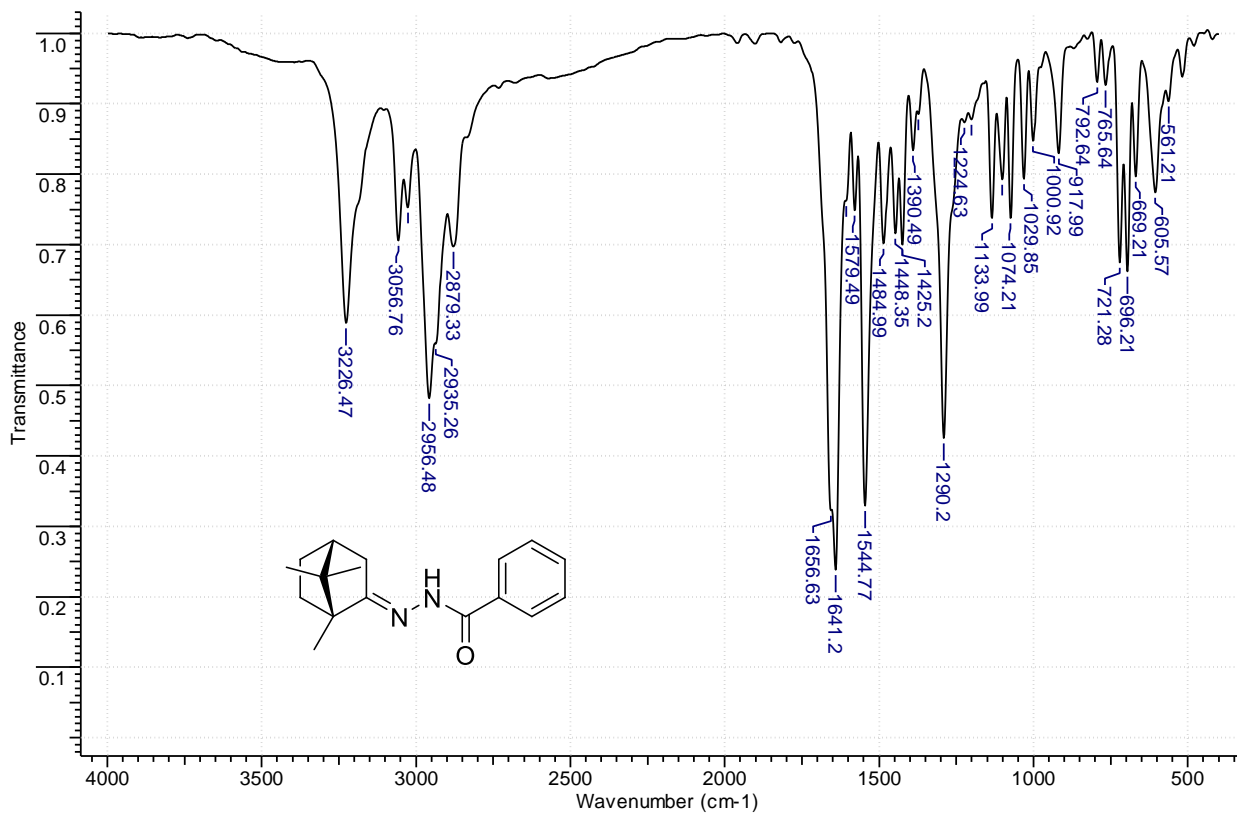



### 3.5 (E)-4-bromo-N'-((1R,4R)-1,7,7-trimethylbicyclo[2.2.1]heptan-2-ylidene)benzohydrazide (10)

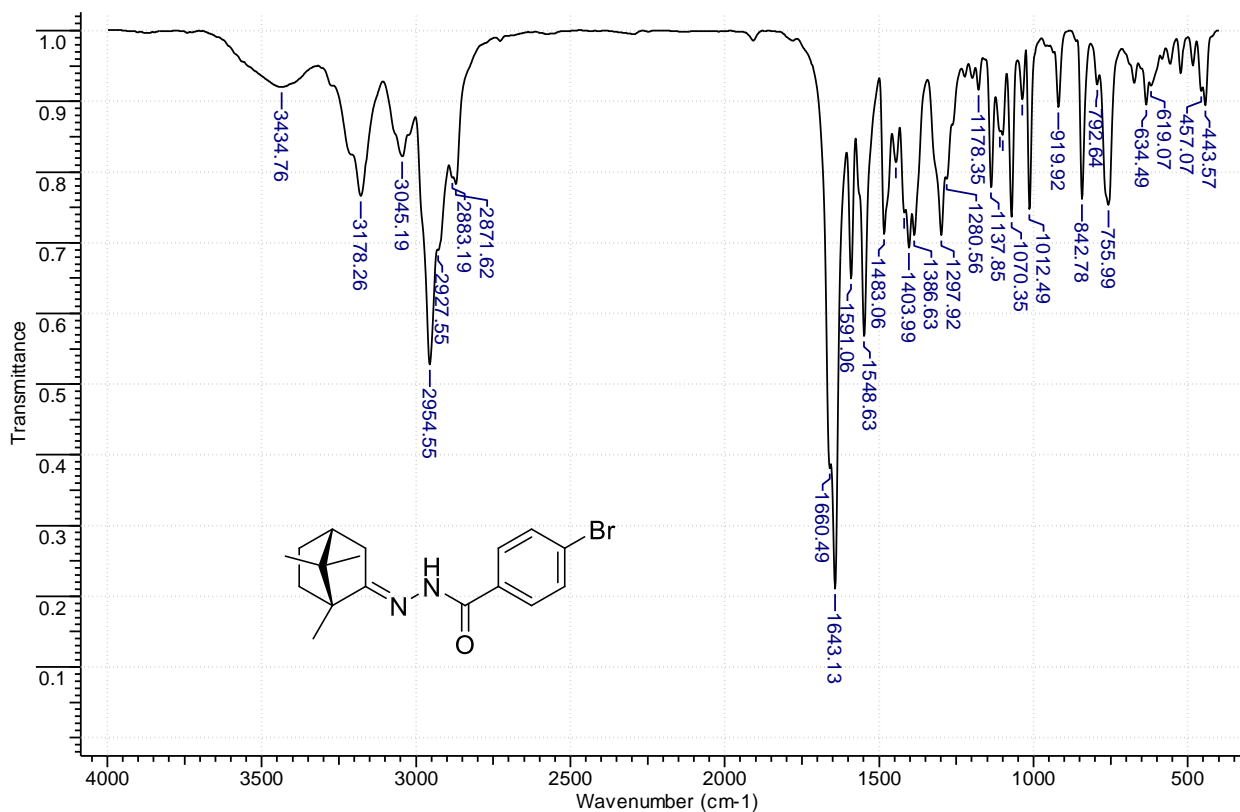

### 3.6 (E)-N'-((1R,4R)-1,7,7-trimethylbicyclo[2.2.1]heptan-2-ylidene)furan-2-carbohydrazide (11)

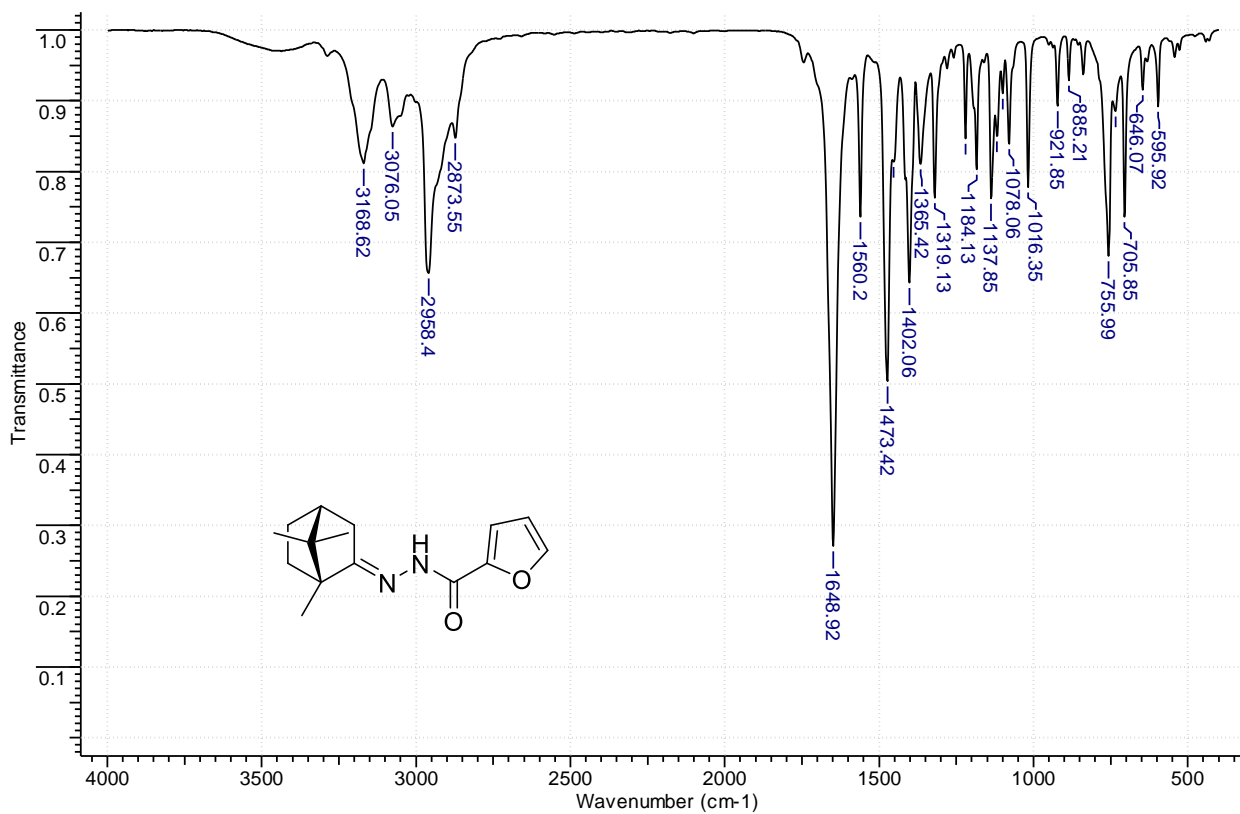

**3.7. N'-[(1R,2E,4R)-1,7,7-Trimethylbicyclo[2.2.1]hept-2-ylidene]thiophene-2-carbohydrazide (12)**

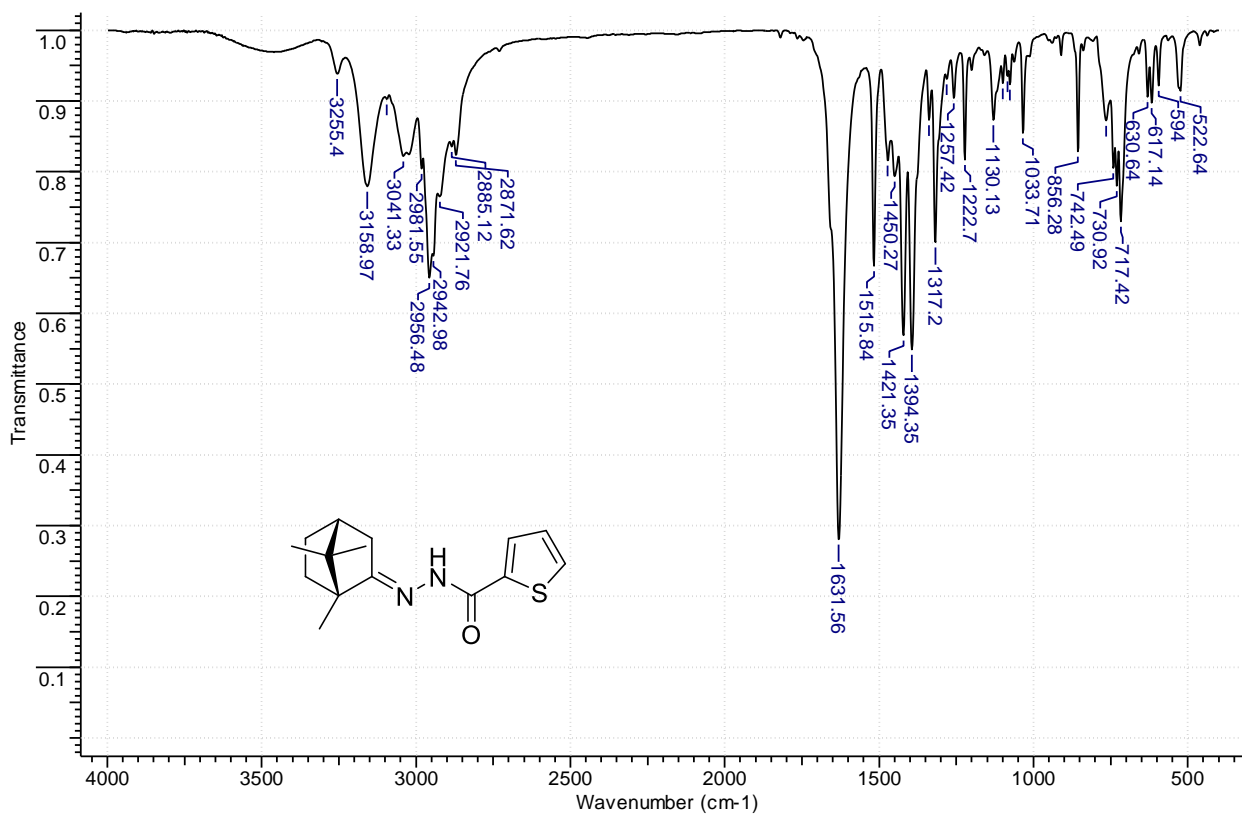

**3.8 Mixture of (3aR,6S,7R,7aS)-2-ethyl-1-oxo-N'-[(1R,2E,4R)-1,7,7-trimethylbicyclo[2.2.1]hept-2-ylidene]-1,2,3,6,7,7a-hexahydro-3a,6-epoxyisindole-7-carbohydrazide (a) and (3aS,6R,7S,7aR)-2-ethyl-1-oxo-N'-[(1R,2E,4R)-1,7,7-trimethylbicyclo[2.2.1]hept-2-ylidene]-1,2,3,6,7,7a-hexahydro-3a,6-epoxyisindole-7-carbohydrazide (b) 13**

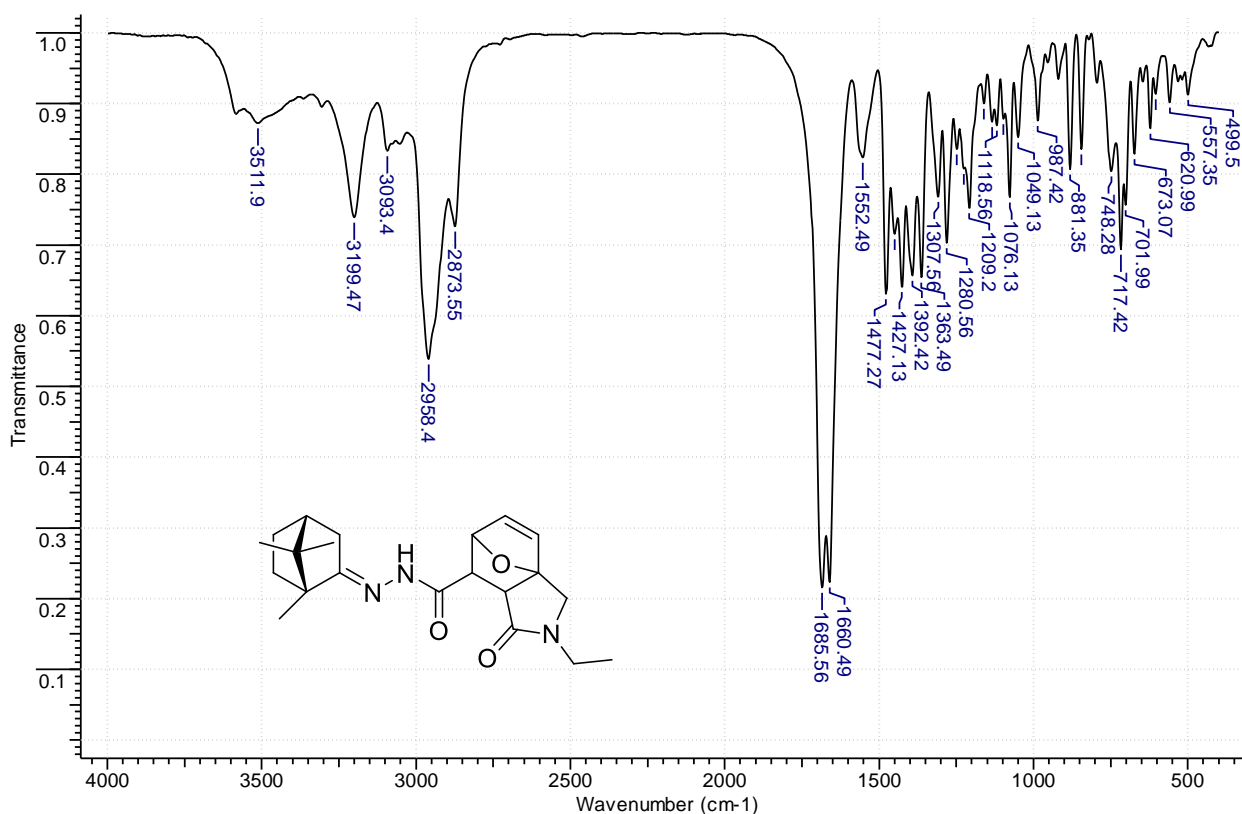

**3.9. Mixture of (3aR,6S,7R,7aS)-2-(2-methoxyethyl)-1-oxo-N'-[(1R,2E,4R)-1,7,7-trimethylbicyclo[2.2.1]hept-2-ylidene]-1,2,3,6,7,7a-hexahydro-3a,6-epoxyisoindole-7-carbohydrazide (a) and (3aS,6R,7S,7aR)-2-(2-methoxyethyl)-1-oxo-N'-[(1R,2E,4R)-1,7,7-trimethylbicyclo[2.2.1]hept-2-ylidene]-1,2,3,6,7,7a-hexahydro-3a,6-epoxyisoindole-7-carbohydrazide (b) (14)**

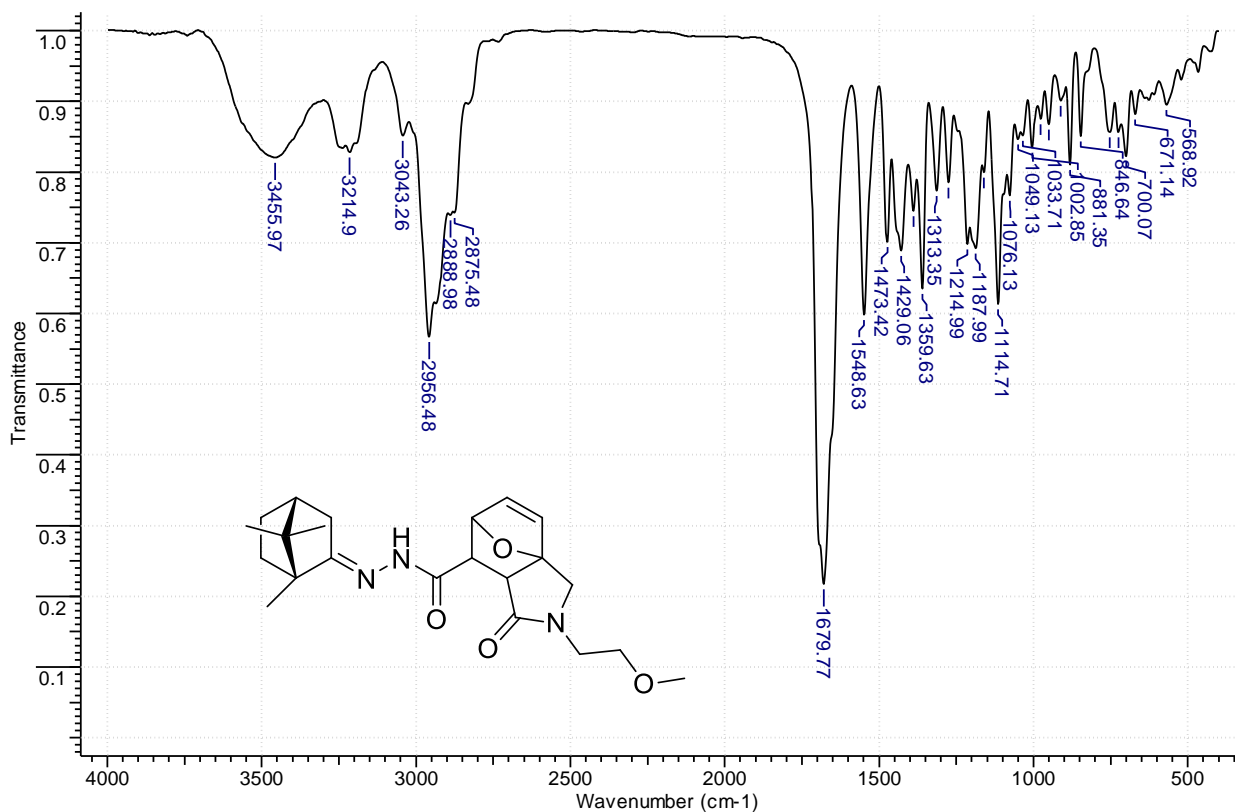

**3.10. Mixture of (3aR,6S,7R,7aS)-6-methyl-1-oxo-2-phenyl-N'-[(1R,2E,4R)-1,7,7-trimethylbicyclo[2.2.1]hept-2-ylidene]-1,2,3,6,7,7a-hexahydro-3a,6-epoxyisoindole-7-carbohydrazide (a) and (3aS,6R,7S,7aR)-6-methyl-1-oxo-2-phenyl-N'-[(1R,2E,4R)-1,7,7-trimethylbicyclo[2.2.1]hept-2-ylidene]-1,2,3,6,7,7a-hexahydro-3a,6-epoxyisoindole-7-carbohydrazide (b) (15)**

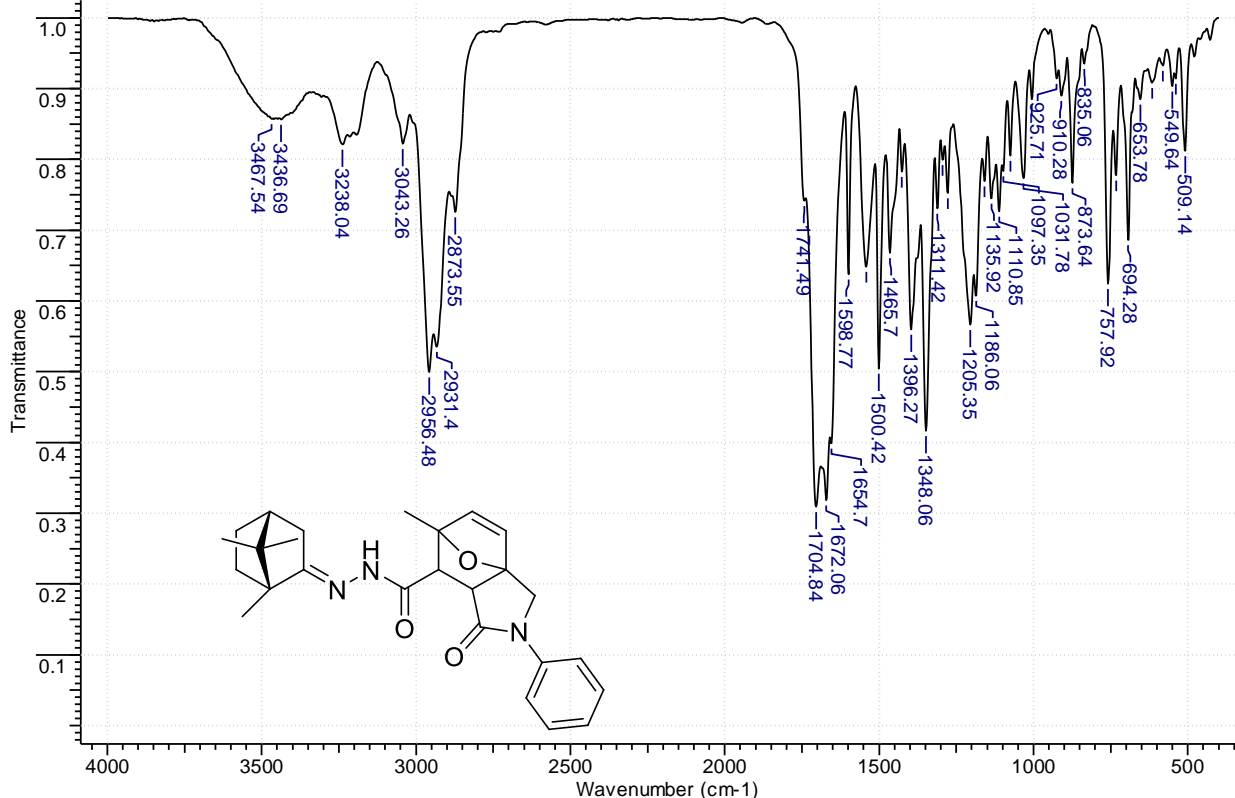

**3.11. Mixture of (3aR,6S,7R,7aS)-1-oxo-2-(2-phenylethyl)-N'-[(1R,2E,4R)-1,7,7-trimethylbicyclo[2.2.1]hept-2-ylidene]-1,2,3,6,7,7a-hexahydro-3a,6-epoxyisoindole-7-carbohydrazide (a) and (3aS,6R,7S,7aR)-1-oxo-2-(2-phenylethyl)-N'-[(1R,2E,4R)-1,7,7-trimethylbicyclo[2.2.1]hept-2-ylidene]-1,2,3,6,7,7a-hexahydro-3a,6-epoxyisoindole-7-carbohydrazide (b) (16)**

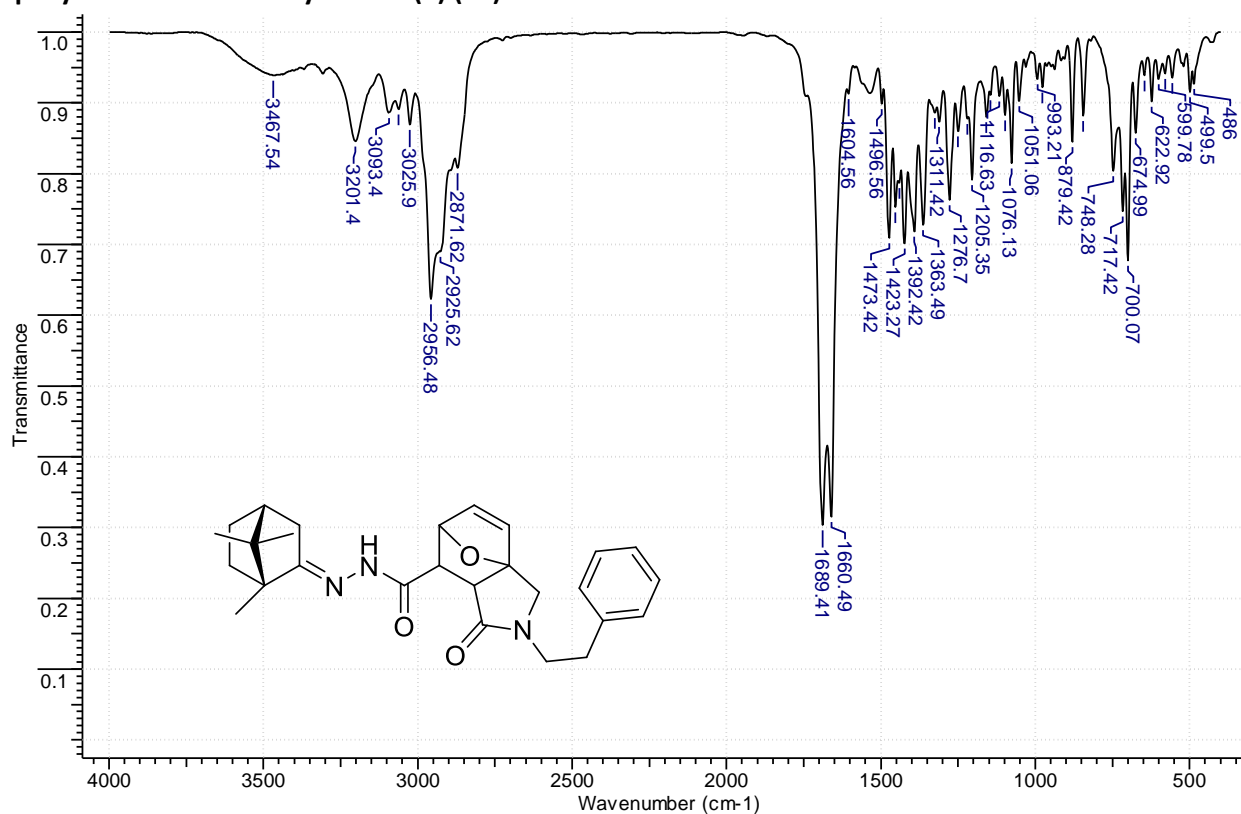

**3.12. Mixture of (5aS,6R,7S,9aR)-5-oxo-N'-[(1R,2E,4R)-1,7,7-trimethylbicyclo[2.2.1]hept-2-ylidene]-2,3,5,5a,6,7-hexahydro-7,9a-epoxy[1,3]thiazolo[2,3-a]isoindole-6-carbohydrazide (a) and (5aR,6S,7R,9aS)-5-oxo-N'-[(1R,2E,4R)-1,7,7-trimethylbicyclo[2.2.1]hept-2-ylidene]-2,3,5,5a,6,7-hexahydro-7,9a-epoxy[1,3]thiazolo[2,3-a]isoindole-6-carbohydrazide (b) (17)**

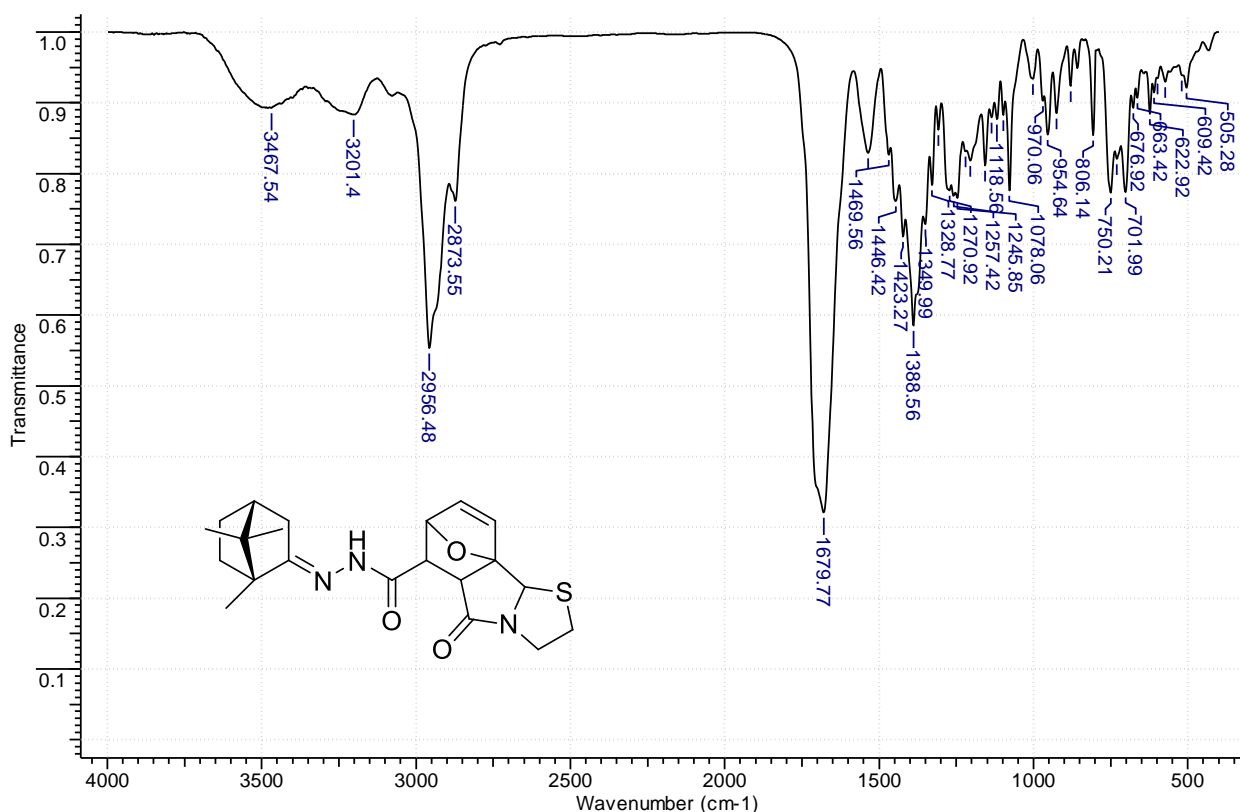

**3.13. Mixture of (1*R*,2*S*,4*aR*,11*aS*)-11-oxo-*N'*-[(1*R*,2*E*,4*R*)-1,7,7-trimethylbicyclo[2.2.1]hept-2-ylidene]-1,2,11,11a-tetrahydro-2,4a-epoxyisindolo[1,2-*b*][1,3]benzothiazole-1-carbohydrazide (a) and (1*S*,2*R*,4*aS*,11*aR*)-11-oxo-*N'*-[(1*R*,2*E*,4*R*)-1,7,7-trimethylbicyclo[2.2.1]hept-2-ylidene]-1,2,11,11a-tetrahydro-2,4a-epoxyisindolo[1,2-*b*][1,3]benzothiazole-1-carbohydrazide (b) (19)**

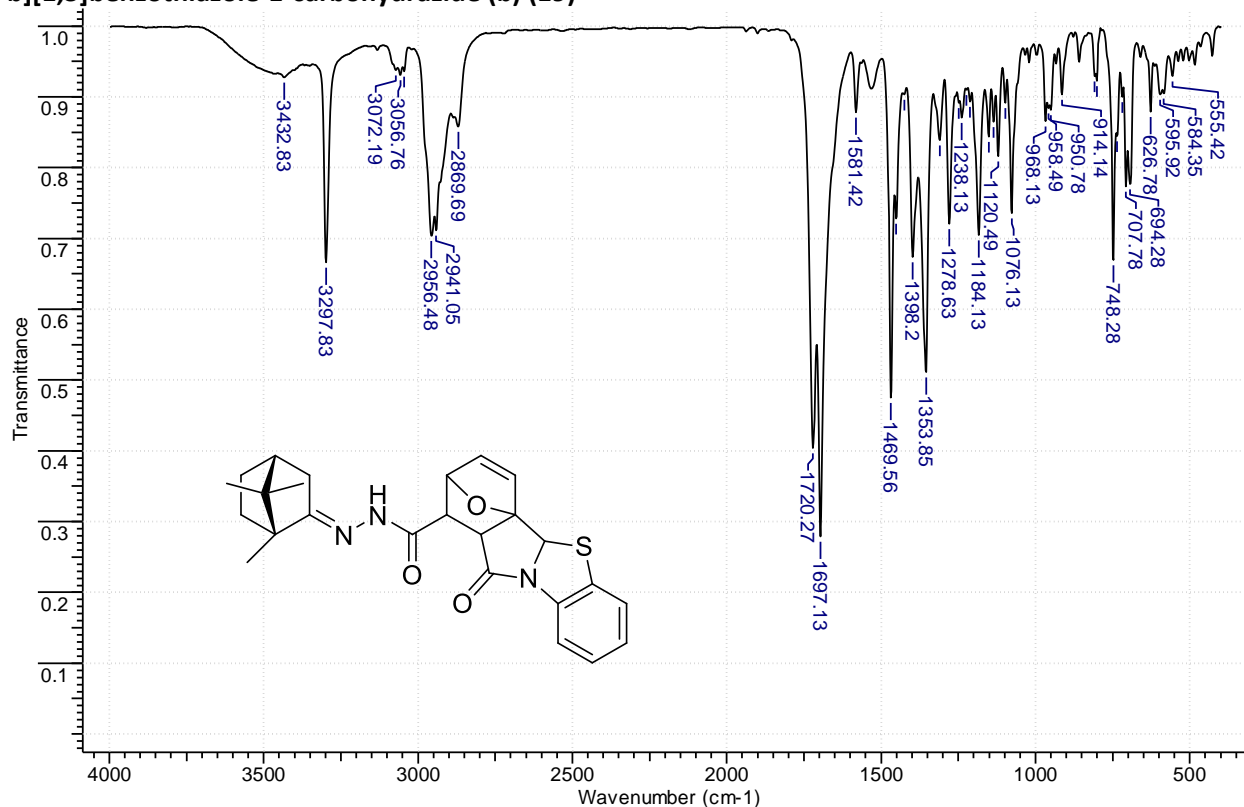

**3.14. Mixture of (6*aS*,7*R*,8*S*,10*aR*,10*bR*)-6-oxo-*N'*-[(1*R*,2*E*,4*R*)-1,7,7-trimethylbicyclo[2.2.1]hept-2-ylidene]-3,4,6,6*a*,7,8-hexahydro-2*H*-8,10*a*-epoxy[1,3]oxazino[2,3-*a*]isindole-7(10*bH*)-carbohydrazide (a) and (6*aR*,7*S*,8*R*,10*aS*,10*bS*)-6-oxo-*N'*-[(1*R*,2*E*,4*R*)-1,7,7-trimethylbicyclo[2.2.1]hept-2-ylidene]-3,4,6,6*a*,7,8-hexahydro-2*H*-8,10*a*-epoxy[1,3]oxazino[2,3-*a*]isindole-7(10*bH*)-carbohydrazide (b) (18)**

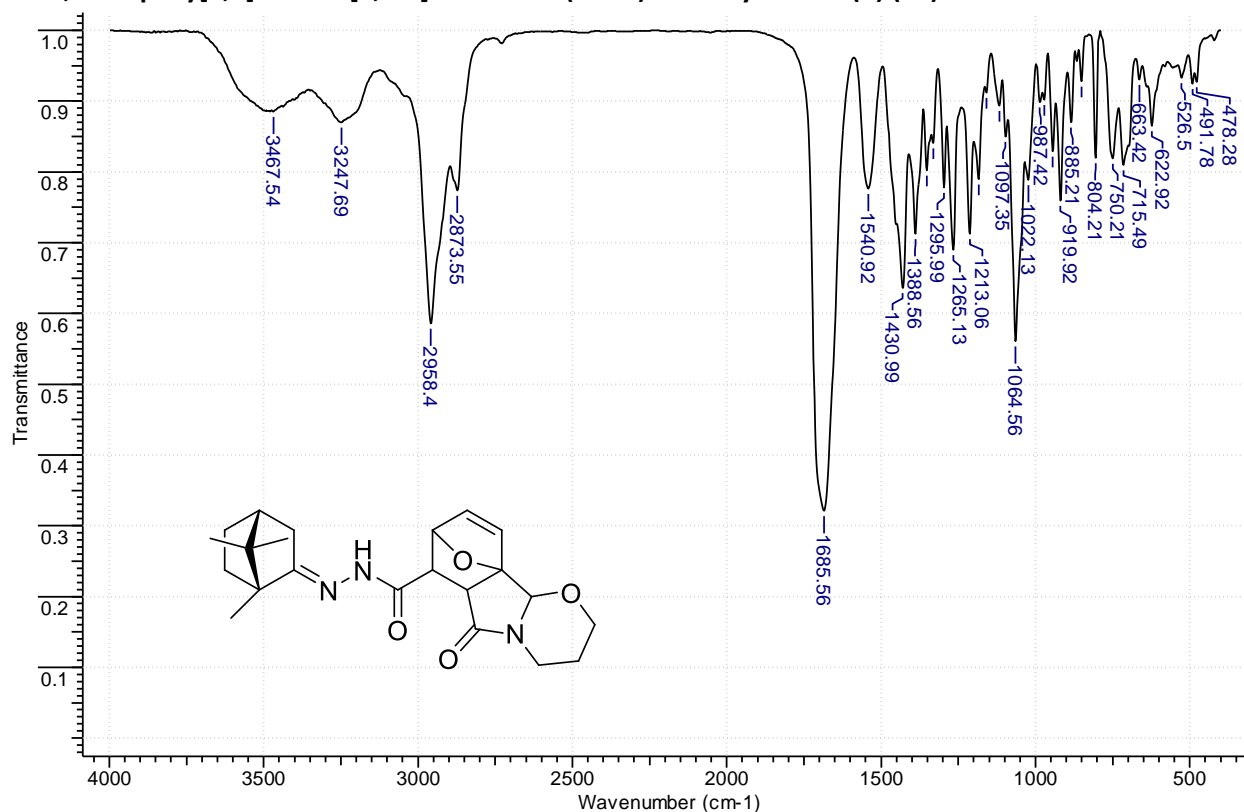

## 4. High Resolution Mass Spectra of Selected Compounds

### 4.1. (E)-N'-((1R,4R)-1,7,7-trimethylbicyclo[2.2.1]heptan-2-ylidene)acetohydrazide (6)

KSM-41 #2 RT: 0.07 AV: 1 NL: 1.35E6  
T: +c EI Full ms [ 14.50-250.50]

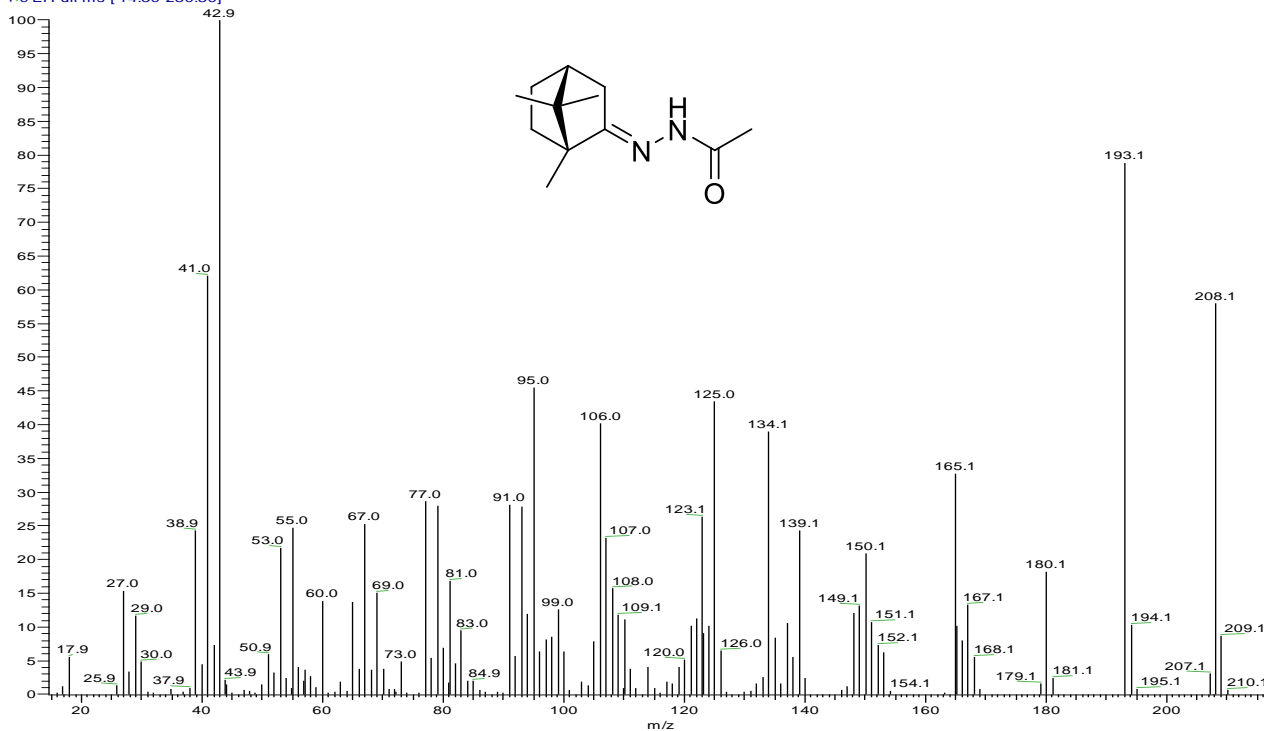

### 4.2. (E)-2,2,2-trifluoro-N'-((1R,4R)-1,7,7-trimethylbicyclo[2.2.1]heptan-2-ylidene)acetohydrazide (7)

KSM-33 #8 RT: 0.37 AV: 1 NL: 3.32E6  
T: +c EI Full ms [ 32.50-300.50]

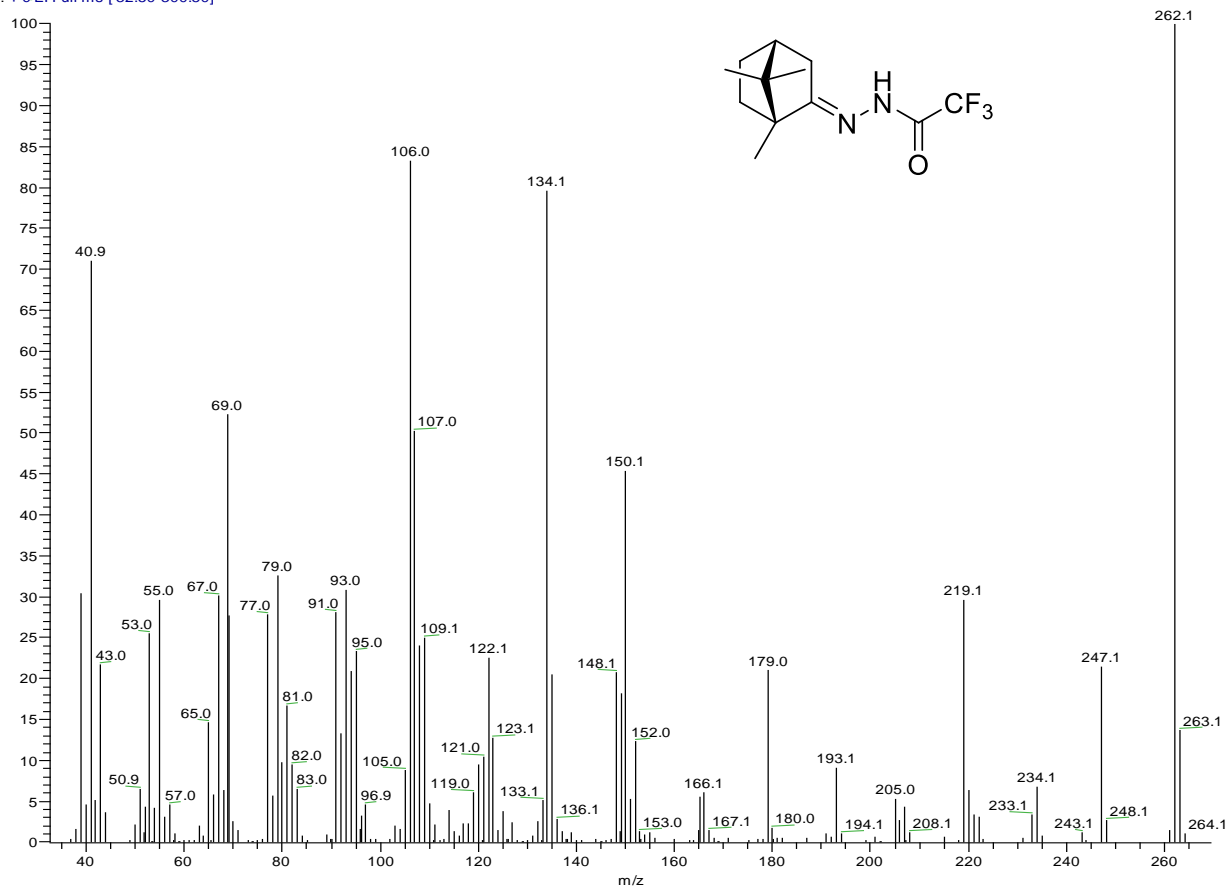

### 4.3. (E)-N'-((1R,4R)-1,7,7-trimethylbicyclo[2.2.1]heptan-2-ylidene)butyrohydrazide (8)

KSM-27 #4 RT: 0.20 AV: 1 NL: 2.89E6  
T: + c EI Full ms [ 14.50-250.50]

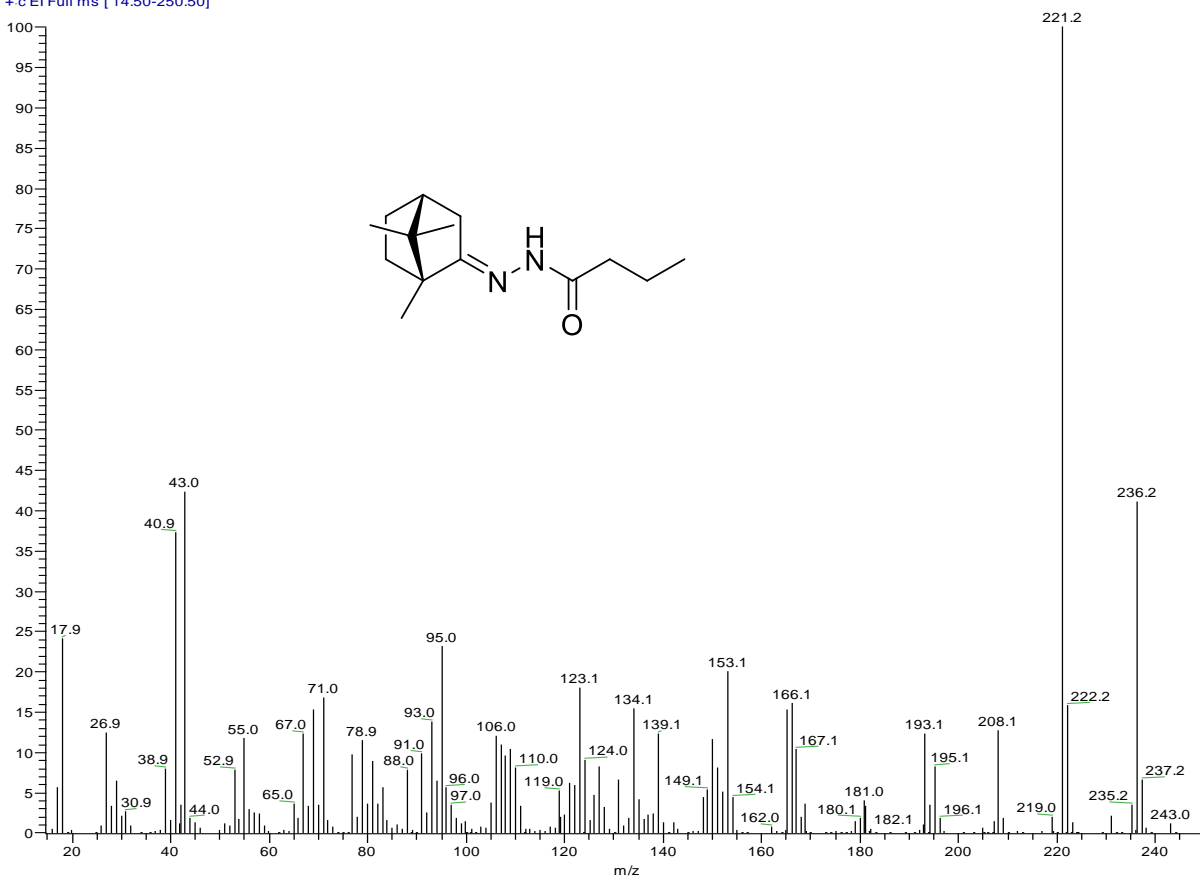

### 4.4. (E)-N'-((1R,4R)-1,7,7-trimethylbicyclo[2.2.1]heptan-2-ylidene)benzohydrazide (9)

KSM-19 #12 RT: 0.72 AV: 1 NL: 1.86E6  
T: + c EI Full ms [ 14.50-280.50]

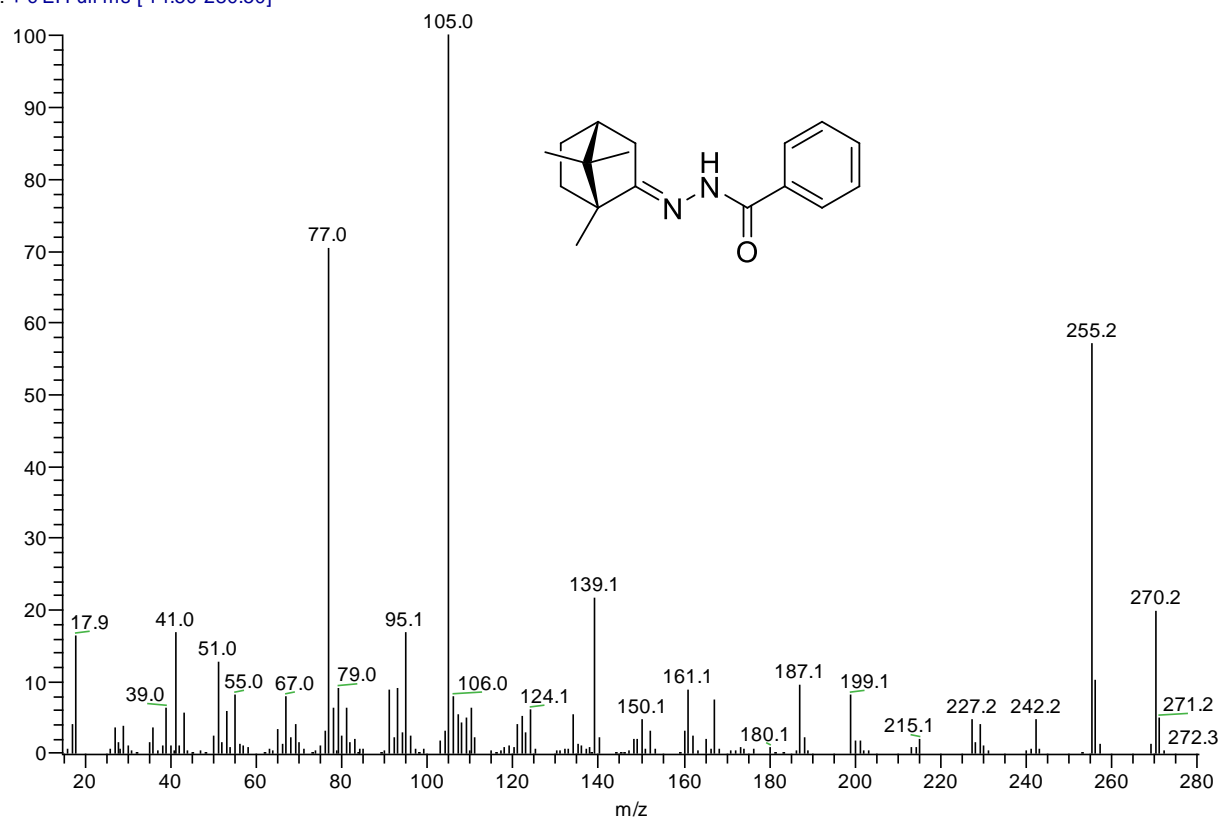

#### 4.5. (E)-4-bromo-N'-((1R,4R)-1,7,7-trimethylbicyclo[2.2.1]heptan-2-ylidene)benzohydrazide (10)

KSM-35 #7 RT: 0.36 AV: 1 NL: 1.49E6  
T: + c EI Full ms [ 32.50-400.50]

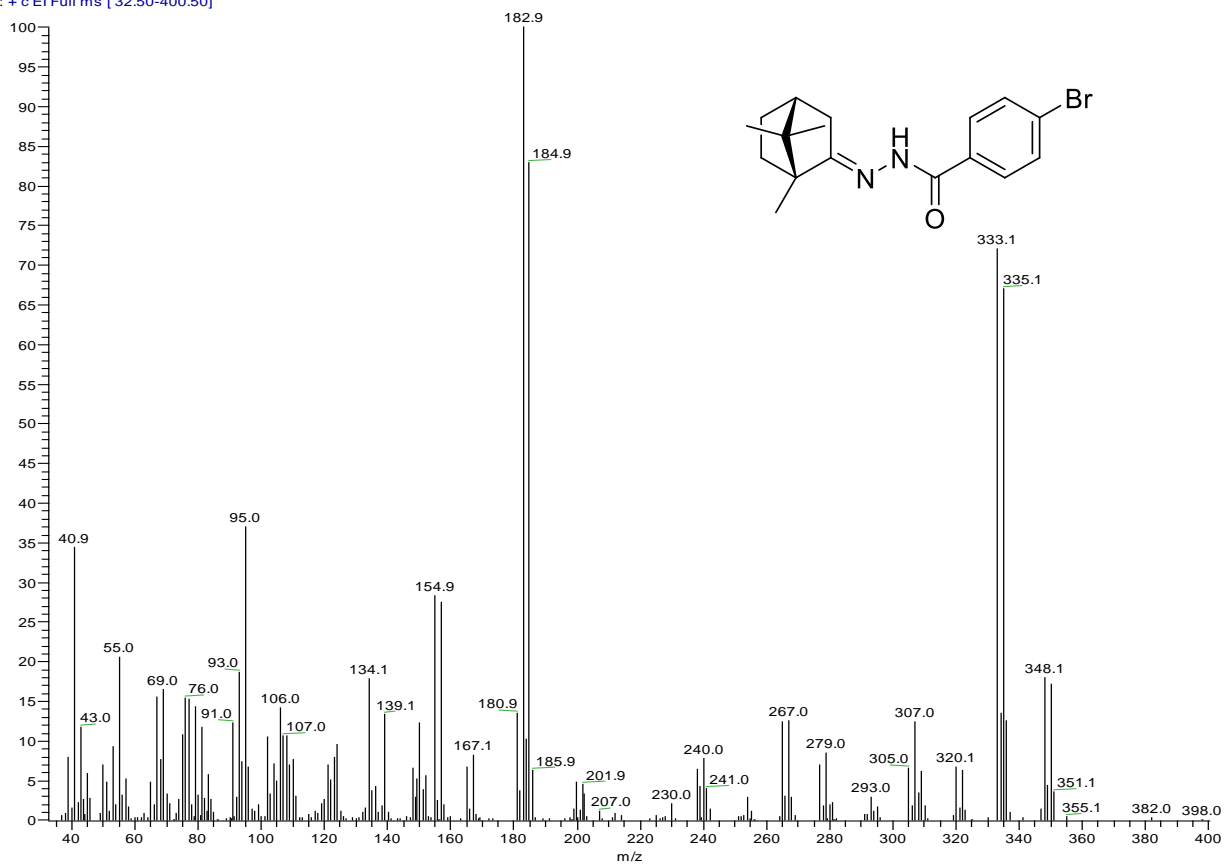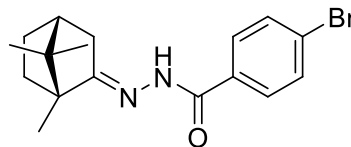

#### 4.6. (E)-N'-((1R,4R)-1,7,7-trimethylbicyclo[2.2.1]heptan-2-ylidene)furan-2-carbohydrazide (11)

KSM-20 #16 RT: 0.80 AV: 1 NL: 1.51E6  
T: + c EI Full ms [ 32.50-279.50]

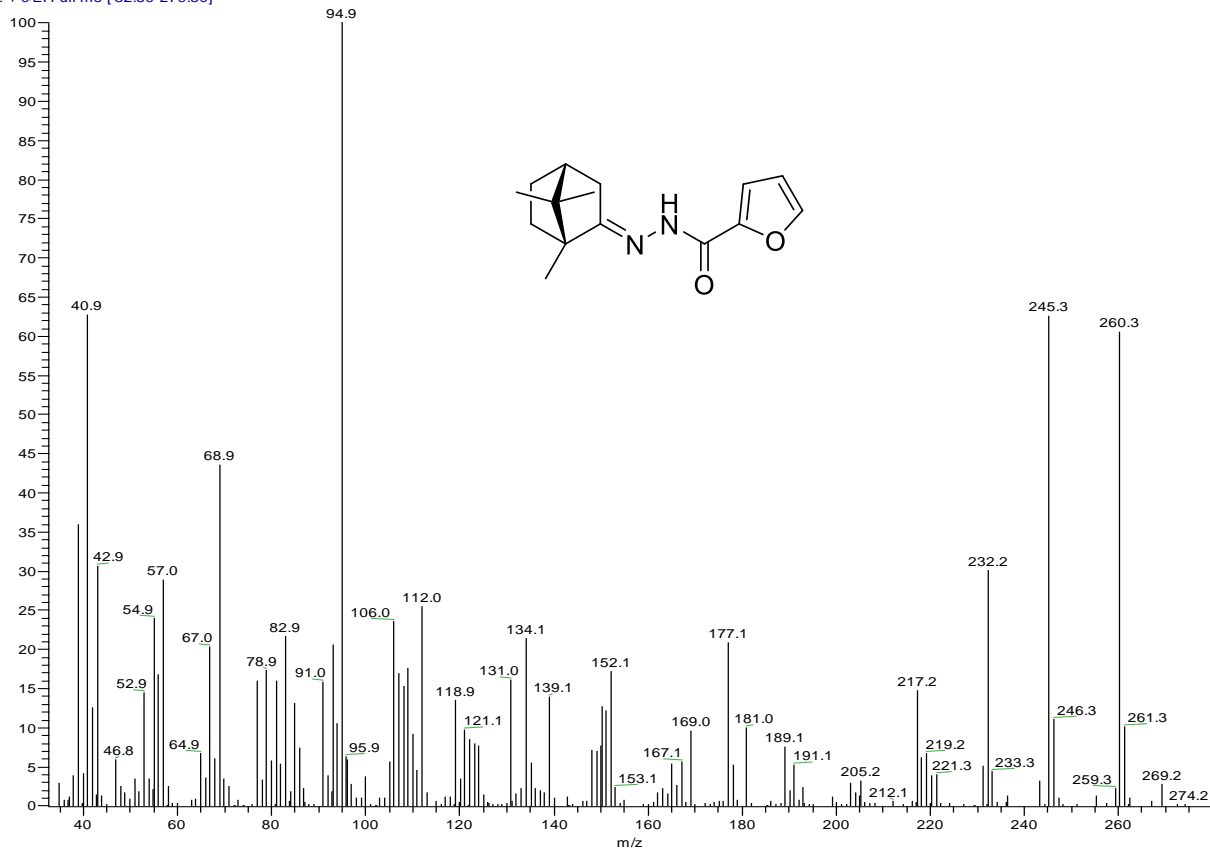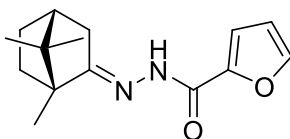



#### 4.7. (E)-N'-((1R,4R)-1,7,7-trimethylbicyclo[2.2.1]heptan-2-ylidene)thiophene-2-carbohydrazide (12)

KSM-21\_180613134518 #8 RT: 0.39 AV: 1 NL: 1.73E7  
T: + c EI Full ms [ 32.50-330.50]

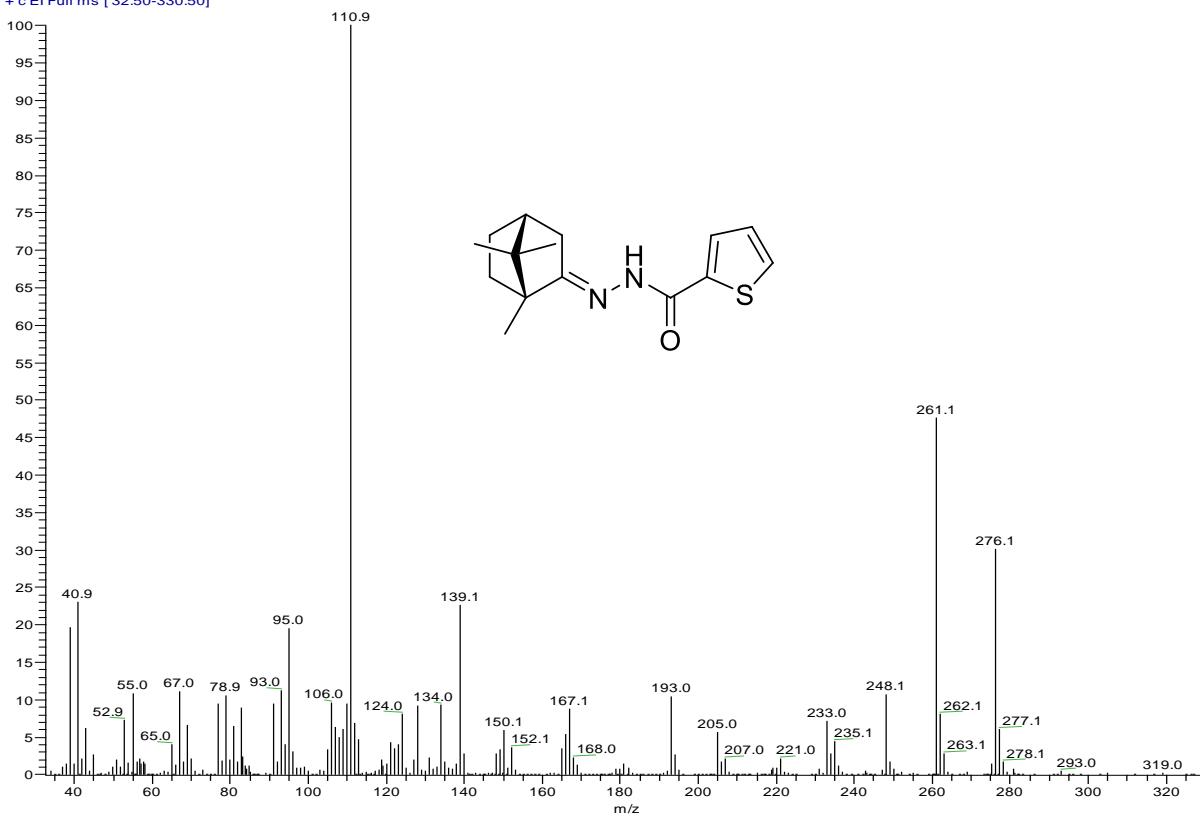

#### 4.8. Mixture of (3aR,6S,7R,7aS)-2-ethyl-1-oxo-N'-[(1R,2E,4R)-1,7,7-trimethylbicyclo[2.2.1]hept-2-ylidene]-1,2,3,6,7,7a-hexahydro-3a,6-epoxyisindole-7-carbohydrazide (a) and (3aS,6R,7S,7aR)-2-ethyl-1-oxo-N'-[(1R,2E,4R)-1,7,7-trimethylbicyclo[2.2.1]hept-2-ylidene]-1,2,3,6,7,7a-hexahydro-3a,6-epoxyisindole-7-carbohydrazide (b) (13)

KSM-15\_#2 RT: 0.08 AV: 1 NL: 4.44E7  
T: + c EI Full ms [ 14.50-400.50]

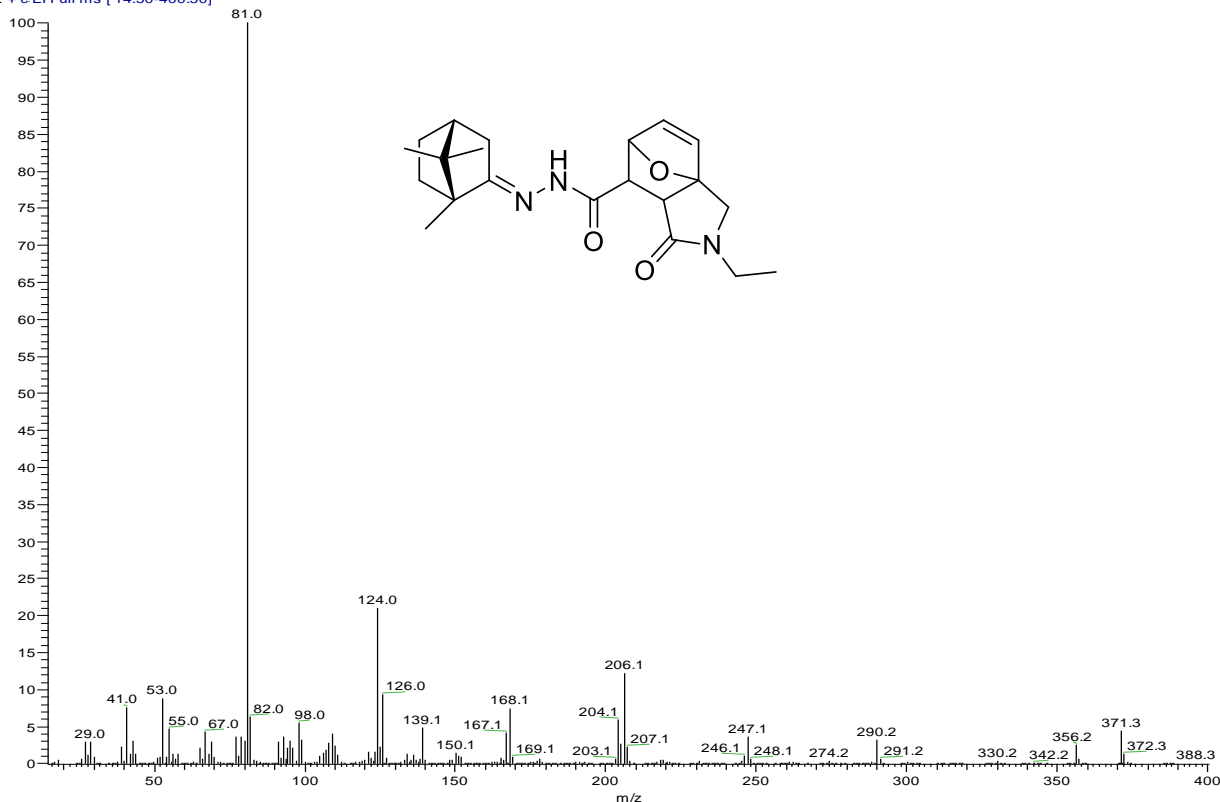

**4.9. Mixture of (3aR,6S,7R,7aS)-2-(2-methoxyethyl)-1-oxo-N'-[(1R,2E,4R)-1,7,7-trimethylbicyclo[2.2.1]hept-2-ylidene]-1,2,3,6,7,7a-hexahydro-3a,6-epoxyisoindole-7-carbohydrazide (a) and (3aS,6R,7S,7aR)-2-(2-methoxyethyl)-1-oxo-N'-[(1R,2E,4R)-1,7,7-trimethylbicyclo[2.2.1]hept-2-ylidene]-1,2,3,6,7,7a-hexahydro-3a,6-epoxyisoindole-7-carbohydrazide (b) (14)**

KSM-28 #14 RT: 0.79 AV: 1 NL: 7.42E6  
T: + c EI Full ms [ 32.50-430.50]

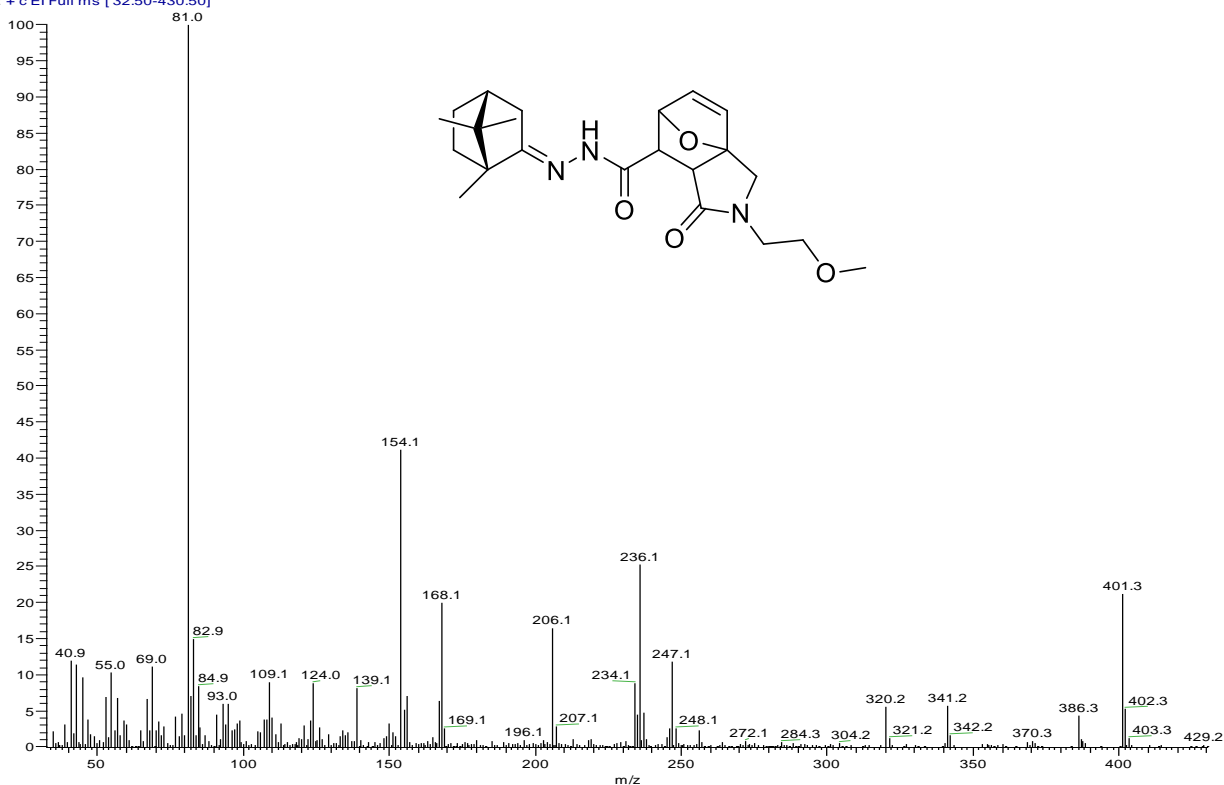

**4.10. Mixture of (3aR,6S,7R,7aS)-6-methyl-1-oxo-2-phenyl-N'-[(1R,2E,4R)-1,7,7-trimethylbicyclo[2.2.1]hept-2-ylidene]-1,2,3,6,7,7a-hexahydro-3a,6-epoxyisoindole-7-carbohydrazide (a) and (3aS,6R,7S,7aR)-6-methyl-1-oxo-2-phenyl-N'-[(1R,2E,4R)-1,7,7-trimethylbicyclo[2.2.1]hept-2-ylidene]-1,2,3,6,7,7a-hexahydro-3a,6-epoxyisoindole-7-carbohydrazide (b) (15)**

KSM-14 #9 RT: 0.49 AV: 1 NL: 6.22E6  
T: + c EI Full ms [ 32.50-450.50]

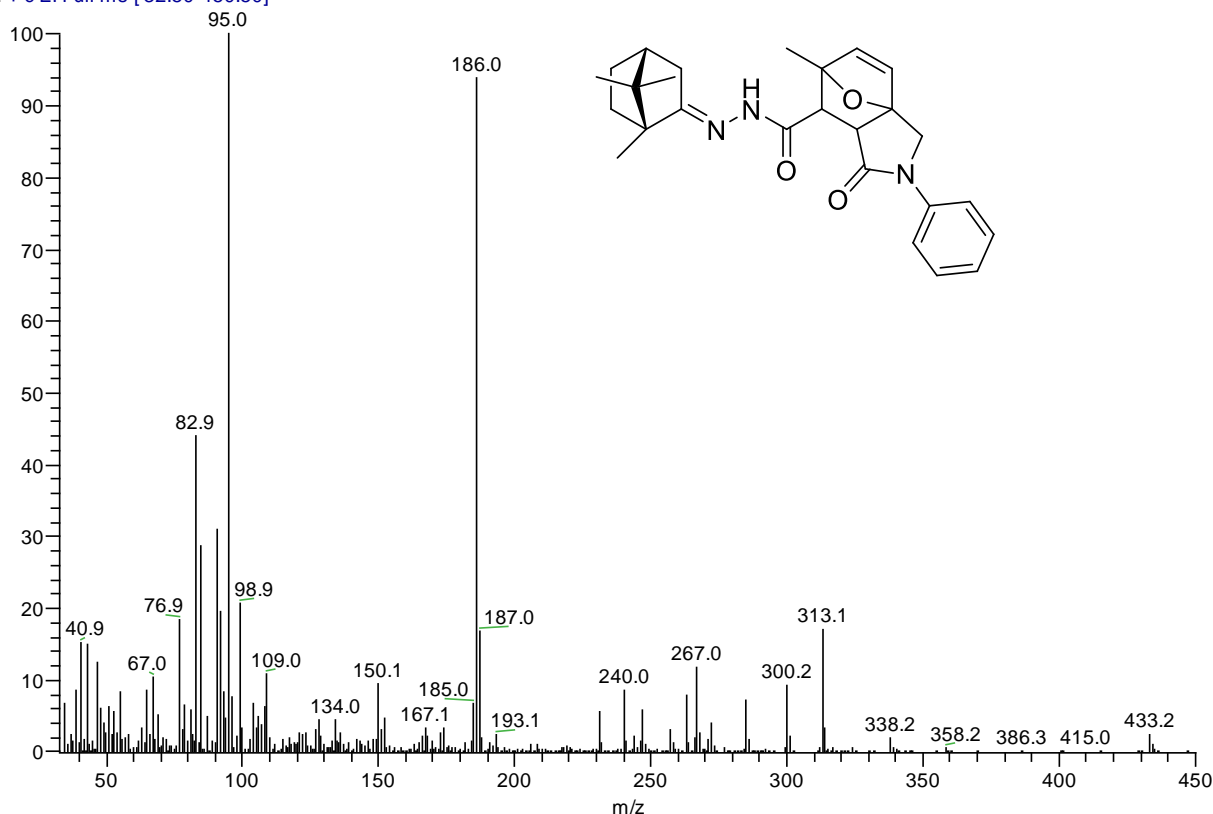

**4.11. Mixture of (3aR,6S,7R,7aS)-1-oxo-2-(2-phenylethyl)-N'-[(1R,2E,4R)-1,7,7-trimethylbicyclo[2.2.1]hept-2-ylidene]-1,2,3,6,7,7a-hexahydro-3a,6-epoxyisoindole-7-carbohydrazide (a) and (3aS,6R,7S,7aR)-1-oxo-2-(2-phenylethyl)-N'-[(1R,2E,4R)-1,7,7-trimethylbicyclo[2.2.1]hept-2-ylidene]-1,2,3,6,7,7a-hexahydro-3a,6-epoxyisoindole-7-carbohydrazide (b) (16)**

KSM-13 #22 RT: 1.68 AV: 1 NL: 4.80E6  
T: + c EI Full ms [ 14.50-480.50]

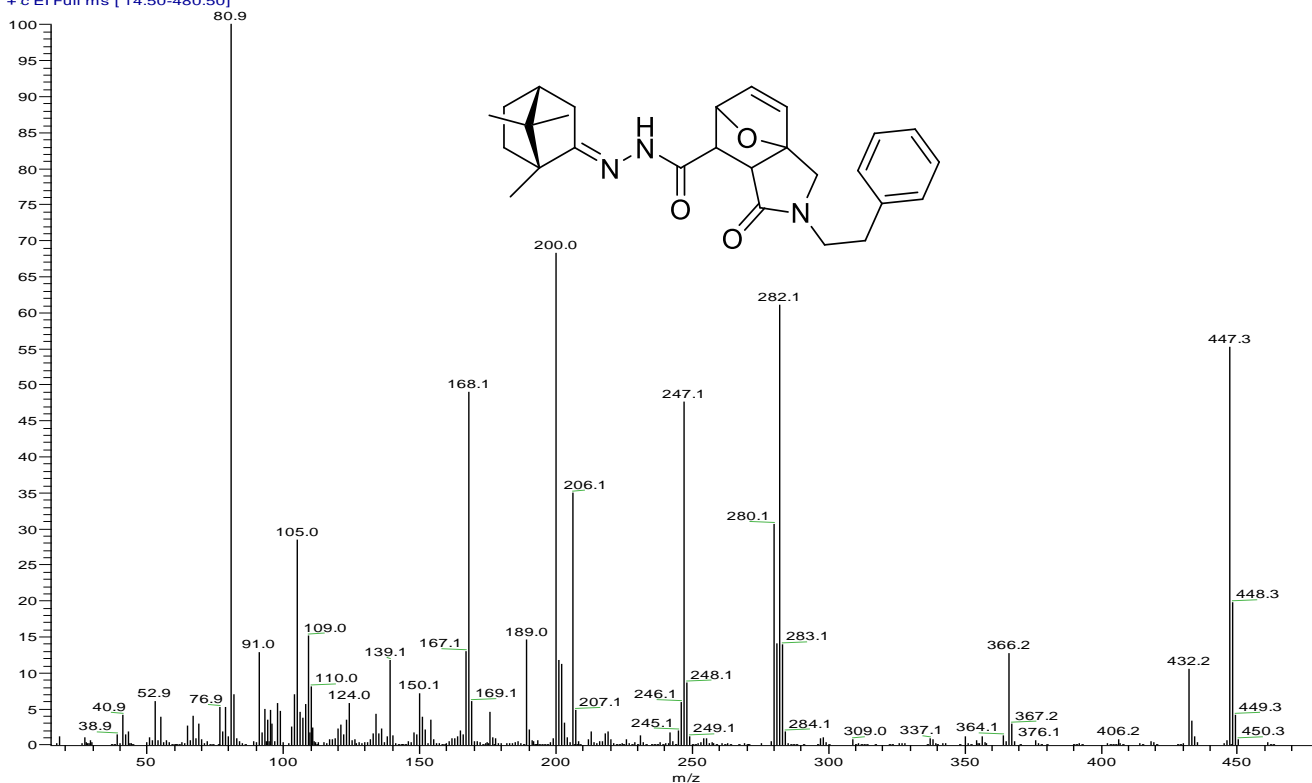

**4.12. Mixture of (5aS,6R,7S,9aR)-5-oxo-N'-[(1R,2E,4R)-1,7,7-trimethylbicyclo[2.2.1]hept-2-ylidene]-2,3,5,5a,6,7-hexahydro-7,9a-epoxy[1,3]thiazolo[2,3-a]isoindole-6-carbohydrazide (a) and (5aR,6S,7R,9aS)-5-oxo-N'-[(1R,2E,4R)-1,7,7-trimethylbicyclo[2.2.1]hept-2-ylidene]-2,3,5,5a,6,7-hexahydro-7,9a-epoxy[1,3]thiazolo[2,3-a]isoindole-6-carbohydrazide (b) (17)**

KSM-9 #21 RT: 1.20 AV: 1 NL: 3.83E6  
T: + c EI Full ms [ 32.50-420.50]

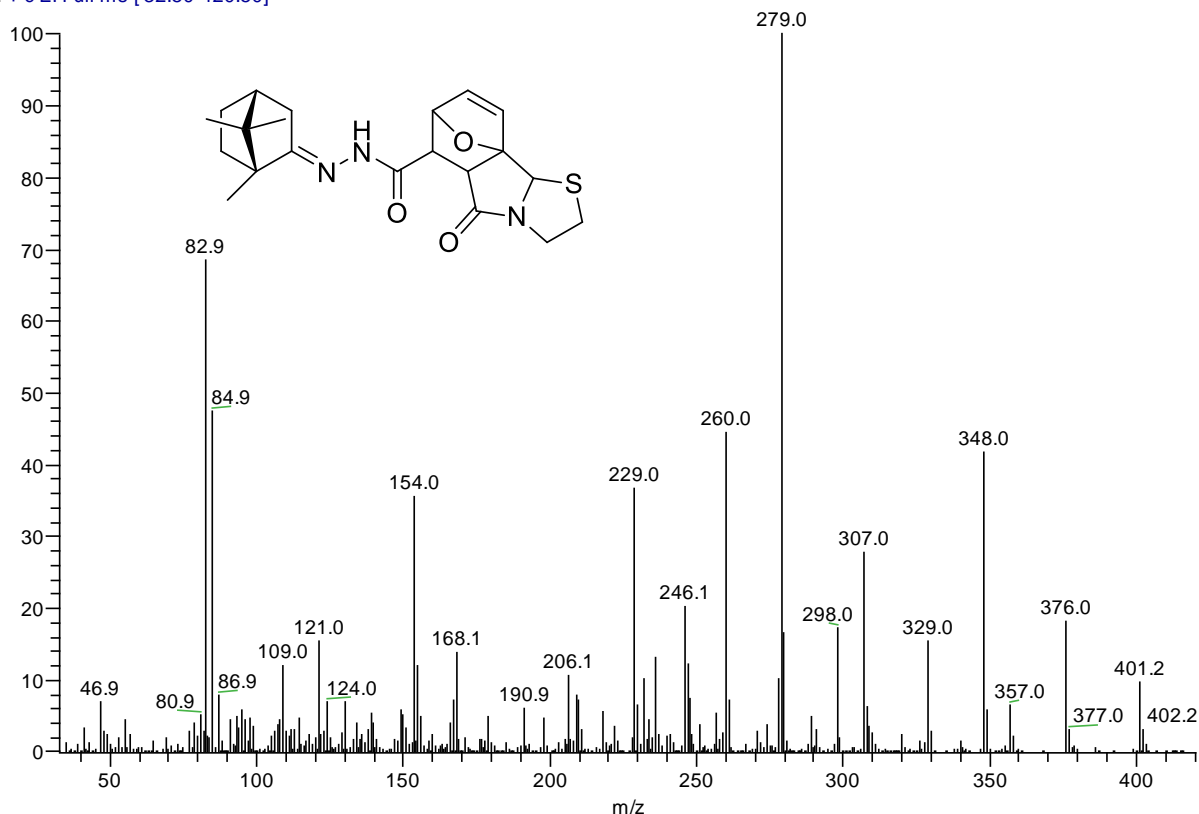

**4.13. Mixture of (1*R*,2*S*,4*aR*,11*aS*)-11-oxo-*N'*-[(1*R*,2*E*,4*R*)-1,7,7-trimethylbicyclo[2.2.1]hept-2-ylidene]-1,2,11,11a-tetrahydro-2,4a-epoxyisindolo[1,2-*b*][1,3]benzothiazole-1-carbohydrazide (a) and (1*S*,2*R*,4*aS*,11*aR*)-11-oxo-*N'*-[(1*R*,2*E*,4*R*)-1,7,7-trimethylbicyclo[2.2.1]hept-2-ylidene]-1,2,11,11a-tetrahydro-2,4a-epoxyisindolo[1,2-*b*][1,3]benzothiazole-1-carbohydrazide (b) (19)**

KSM-8 #41 RT: 3.20 AV: 1 NL: 9.61E5  
T: + c EI Full ms [ 14.50-480.50]

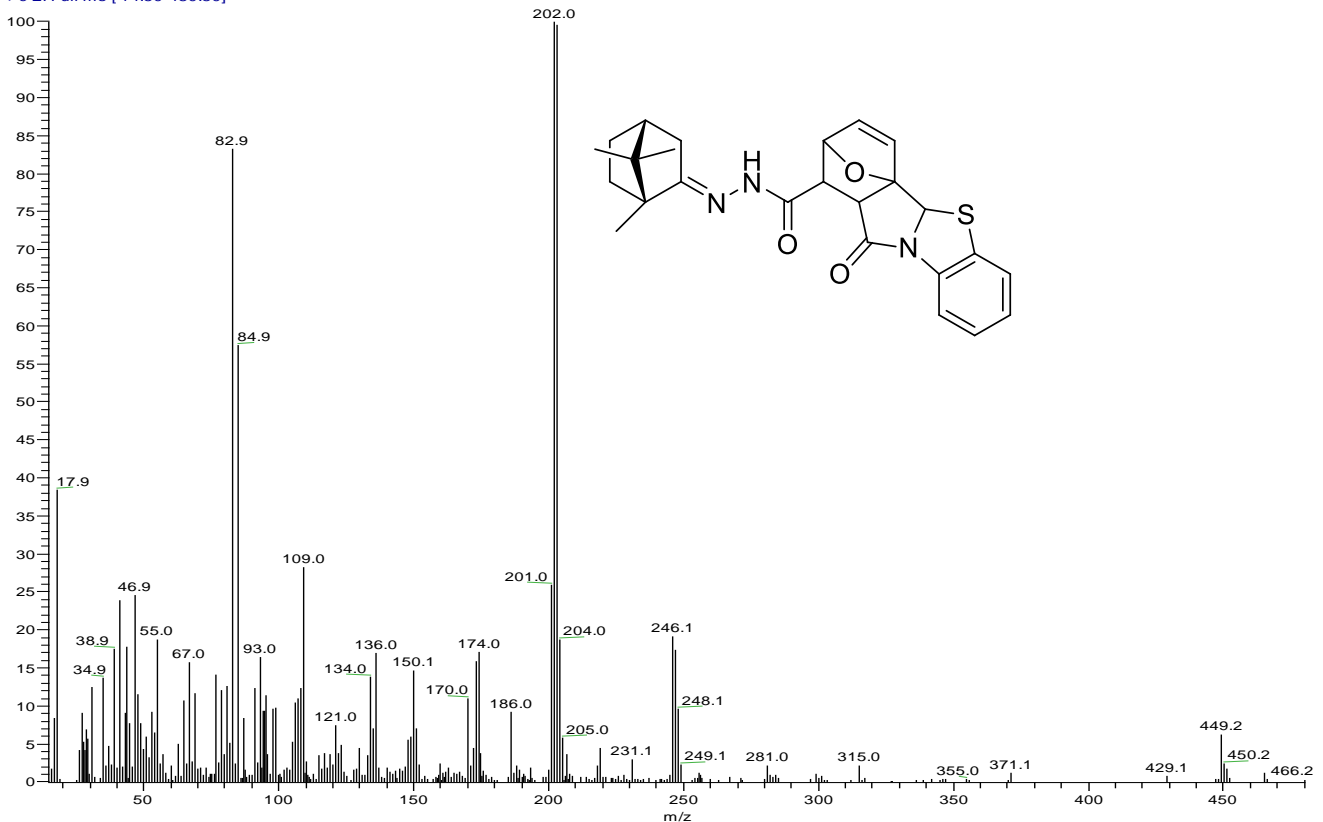

**4.14. Mixture of (6*aS*,7*R*,8*S*,10*aR*,10*bR*)-6-oxo-*N'*-[(1*R*,2*E*,4*R*)-1,7,7-trimethylbicyclo[2.2.1]hept-2-ylidene]-3,4,6,6*a*,7,8-hexahydro-2*H*-8,10*a*-epoxy[1,3]oxazino[2,3-*a*]isindole-7(10*bH*)-carbohydrazide (a) and (6*aR*,7*S*,8*R*,10*aS*,10*bS*)-6-oxo-*N'*-[(1*R*,2*E*,4*R*)-1,7,7-trimethylbicyclo[2.2.1]hept-2-ylidene]-3,4,6,6*a*,7,8-hexahydro-2*H*-8,10*a*-epoxy[1,3]oxazino[2,3-*a*]isindole-7(10*bH*)-carbohydrazide (b) (18)**

KSM-6 #1 RT: 0.00 AV: 1 NL: 1.00E7  
T: + c EI Full ms [ 32.50-420.50]

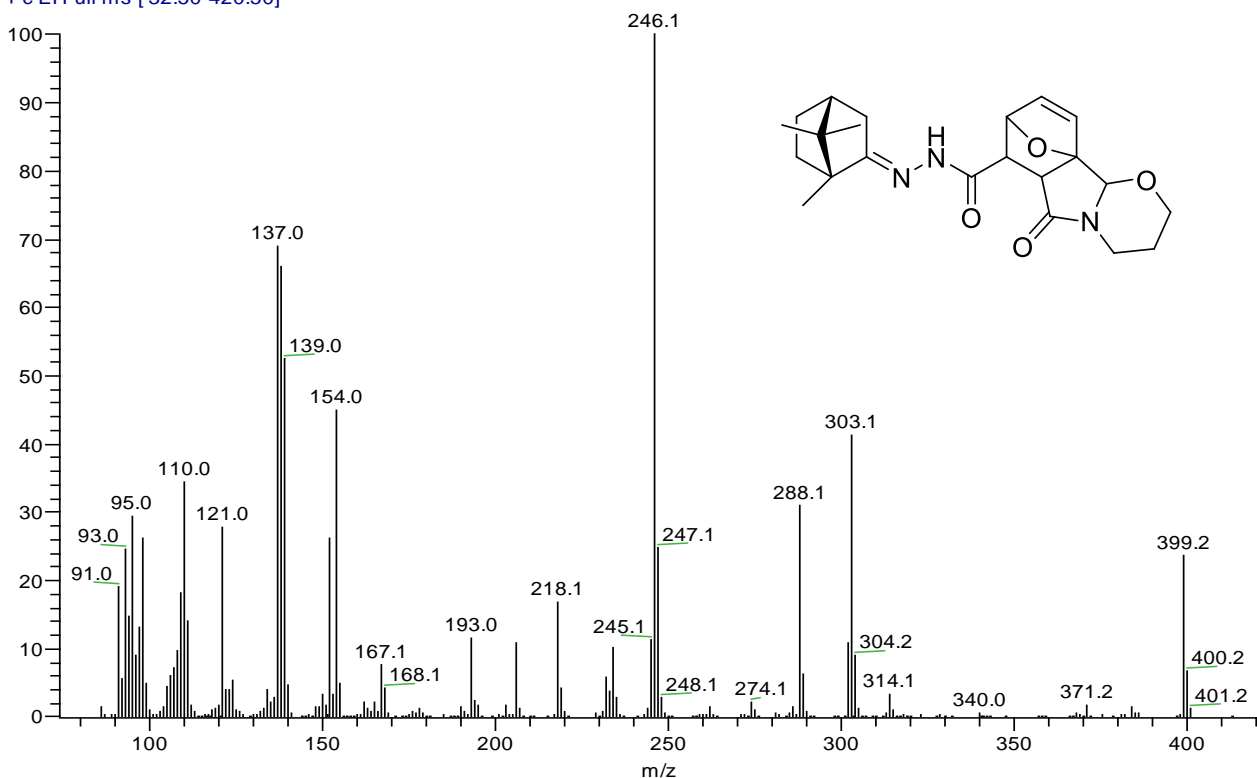

#### 4.15. N'-[(1S,2E,4S)-1,7,7-Trimethylbicyclo[2.2.1]hept-2-ylidene]benzohydrazide (20)

KSM-40 #9 RT: 0.42 AV: 1 NL: 1.12E6  
T: + c EI Full ms [ 32.50-300.50]

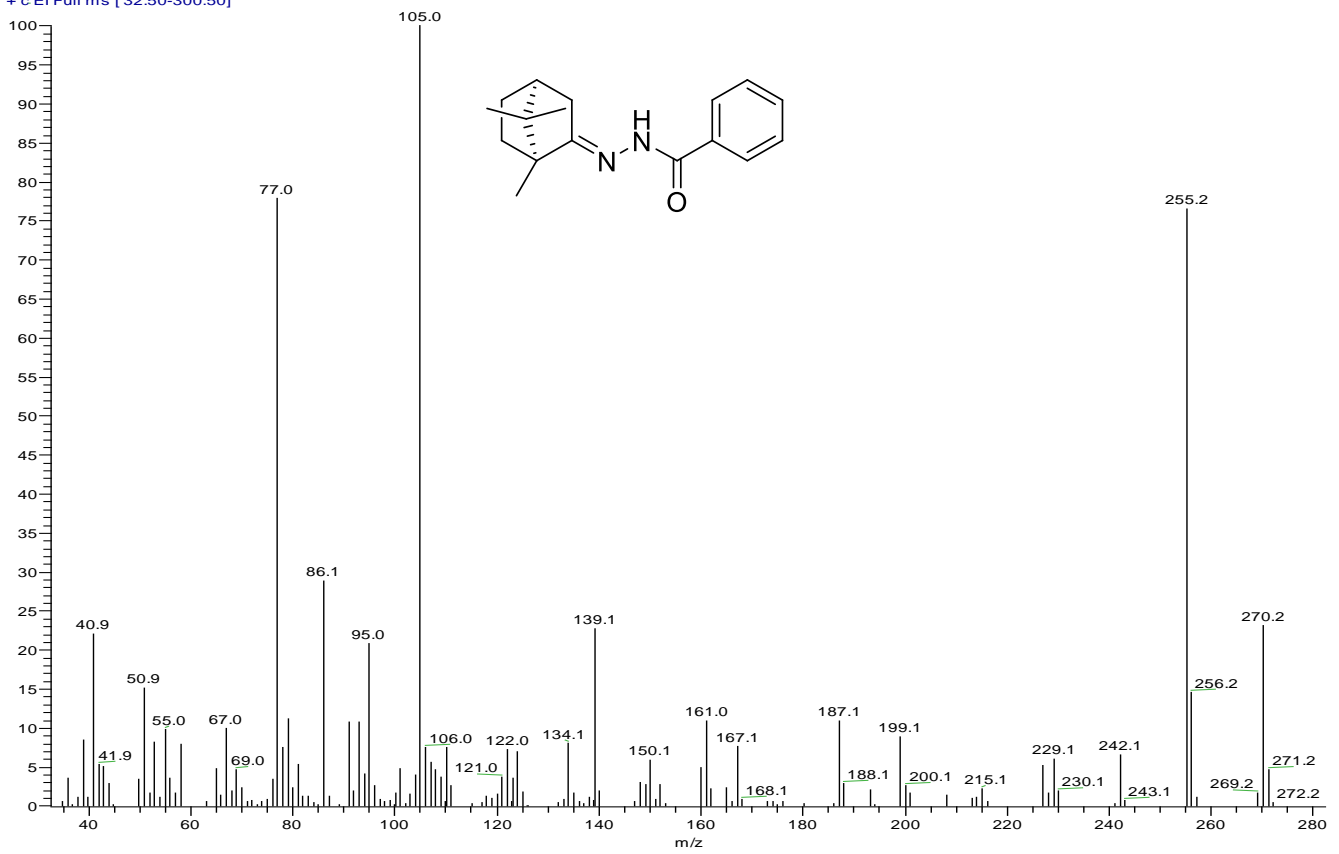

Supplement: MD-009-C8MD00442K-s001.pdf [file MD-009-C8MD00442K-s001.pdf]
